# Supplementary material for: Exploring resilience among hospital workers: a Bayesian approach
Source: Front Public Health. 2024 Aug 29;12:1403721. doi: 10.3389/fpubh.2024.1403721 (PMC11390436; doi:10.3389/fpubh.2024.1403721)
Supplement: Supplementary file 1 [file Table_1.XLSX]

## Sheet: Sheet 1 - Personalità e resili
Personalità e resilienza bozza 3
Timeline	Profession	You are	In what department do you work	Since how many years do you work in this profession	hierarchical role	age	marital status	Physical activity	I am satisfied of my sleep	I am a religious person	I practice meditation or relaxation	I practice mindfulness	Are you satisfied with collaboration with the colleagues of your department	Are you satisfied with communication with the colleagues of your department	are you supported from the colleagues of your department	are you supported from the colleagues of other departments	are you satisfied with your work-life balance	In your department there are sufficient training session on technical skills	In your department there are sufficient training session on non-technical skills	In your department there are sufficient debriefings	In your department there are sufficient listening moments	CD-RISC item 1	CD-RISC item 2	CD-RISC item 3	CD-RISC item 4	CD-RISC item 5	CD-RISC item 6	CD-RISC item 7	CD-RISC item 8	CD-RISC item 9	CD-RISC item 10	I see myself as someone who is reserved	I see myself as someone who is generally trusting	I see myself as someone who tends to be lazy	I see myself as someone who is relaxed, handles stress well	I see myself as someone who has few artists interests	I see myself as someone who is extravert, sociable	I see myself as someone who is tends to find faults with others	I see myself as someone who does a thorough job	I see myself as someone who gets nervous easily	I see myself as someone who has an active imagination
2024/01/12 1:56:41 PM CET	Physician	Male	Intensive care medicine	> 20	Executive	>60	Married/in a relationship	2-3 times per week	4	1 not at all	1 never	1 never	4	4	4	3	2	5 totally true	3	2	2	3	3	3	4	1	3	4	3	3	3	3	4	2	3	2	4	5	4	2	4
2024/01/16 1:20:17 PM CET	Physician	Female	Emergency medicine	16-20	executive	46-50	Married/in a relationship	0-1 times per week	2	2	2 seldom	1 never	3	3	4	3	1 not at all	5 totally true	2	3	3	3	3	2	4	2	4	4	4	4	3	3	5	2	2	2	3	5	5	3	5
2024/01/23 7:53:24 AM CET	Physician	Female	Internal medicine	0-5	Worker	26-30	Married/in a relationship	0-1 times per week	2	2	2 seldom	1 never	3	3	3	2	1 not at all	2	3	2	2	2	3	3	4	3	3	3	4	4	3	5	5	3	2	3	2	2	4	3	2
2024/01/23 7:54:30 AM CET	Physician	Female	Internal medicine	6-10	Executive	35-40	Married/in a relationship	0-1 times per week	2	5 totally	1 never	1 never	4	3	3	2	1 not at all	2	1 not at all true	1 not at all true	3	4	3	1	4	3	3	4	3	4	2	1	5	1	2	2	4	2	5	4	3
2024/01/23 7:55:07 AM CET	Physician	Female	internal medicine	6-10	manager	41-45	Married/in a relationship	0-1 times per week	2	2	1 never	2 seldom	3	3	3	3	2	4	3	4	3	3	2	2	2	1	2	2	3	3	2	3	5	1	1	1	3	2	4	1	3
2024/01/23 7:55:20 AM CET	Administrative sector worker	Female	Internal medicine	6-10	Manager	35-40	Single	0-1 times per week	4	4	3 sometimes	3 sometimes	4	3	4	4	3	4	3	4	4	3	3	2	1	3	3	3	2	3	2	3	5	2	2	1	4	4	4	3	5
2024/01/23 7:55:28 AM CET	Physician	Male	Internal medicine	> 20	Executive	>60	Married/in a relationship	0-1 times per week	3	1 not at all	2 seldom	1 never	5 totally	5 totally	5 totally	4	3	5 totally true	3	4	4	2	3	2	3	3	3	4	2	2	3	2	5	2	4	1	3	4	4	3	3
2024/01/23 7:55:31 AM CET	Physician	Male	Internal medicine	6-10	Worker	35-40	Married/in a relationship	0-1 times per week	2	1 not at all	1 never	1 never	2	2	2	3	1 not at all	3	2	1 not at all true	1 not at all true	3	3	3	3	3	3	4	3	4	4	5	5	1	3	3	2	3	5	5	4
2024/01/23 7:55:43 AM CET	Physician	Male	Internal medicine	> 20	executive	56-60	Single	0-1 times per week	2	1 not at all	2 seldom	1 never	4	3	5 totally	4	2	5 totally true	5 totally true	3	3	3	4	3	2	4	3	4	2	4	4	3	4	3	3	2	3	1	4	3	3
2024/01/23 7:55:49 AM CET	Dietista	Female	Outpatient	6-10	Worker	31-35	Married/in a relationship	0-1 times per week	2	2	1 never	1 never	2	2	2	2	2	1 not at all true	3	4	2	3	3	1	4	3	4	2	2	3	3	5	5	1	4	2	3	5	2	5	3
2024/01/23 7:55:56 AM CET	Nurse	Male	Emergency medicine	16-20	manager	46-50	Single	0-1 times per week	2	3	1 never	1 never	3	3	3	3	2	4	3	1 not at all true	1 not at all true	3	3	2	4	2	2	3	3	3	3	5	4	3	3	3	2	3	3	3	3
2024/01/23 7:56:48 AM CET	Physician	Female	Internal medicine	0-5	Worker	26-30	Married/in a relationship	2-3 times per week	4	4	3 sometimes	3 sometimes	4	4	4	4	3	4	3	4	4	3	3	2	3	3	4	4	3	3	3	2	4	2	4	3	4	5	4	3	4
2024/01/23 7:56:48 AM CET	Nurse	Male	Emergency medicine	> 20	executive	41-45	Married/in a relationship	0-1 times per week	5 totally	2	1 never	1 never	5 totally	4	5 totally	3	4	5 totally true	5 totally true	4	4	4	3	3	4	3	4	4	4	4	3	4	5	1	4	3	4	1	5	1	5
2024/01/23 7:56:53 AM CET	Physician	Female	Internal medicine	6-10	Manager	31-35	Married/in a relationship	0-1 times per week	2	4	4 often	3 sometimes	3	4	5 totally	4	3	4	4	2	2	4	3	3	4	4	3	3	2	4	4	4	4	2	4	1	2	2	4	2	3
2024/01/23 7:56:53 AM CET	Physician	Female	Emergency medicine	6-10	manager	35-40	Married/in a relationship	0-1 times per week	2	1 not at all	1 never	1 never	4	4	4	3	1 not at all	2	2	1 not at all true	1 not at all true	2	3	1	2	2	0	2	0	2	0	3	4	3	2	1	2	2	4	4	4
2024/01/23 7:57:31 AM CET	Nurse	Female	Internal medicine	16-20	Worker	41-45	Married/in a relationship	2-3 times per week	2	1 not at all	1 never	2 seldom	4	3	5 totally	4	2	4	4	5 totally true	4	4	4	4	3	2	2	3	4	4	4	3	5	3	4	1	5	2	5	1	2
2024/01/23 7:57:40 AM CET	Physician	Male	Surgery	6-10	Worker	31-35	Single	2-3 times per week	2	1 not at all	1 never	1 never	4	3	4	5 totally	1 not at all	2	3	5 totally true	1 not at all true	3	4	2	4	4	4	4	4	4	4	3	5	1	4	2	4	3	5	3	4
2024/01/23 7:58:37 AM CET	Nurse	Female	Surgery	6-10	Worker	26-30	Married/in a relationship	0-1 times per week	4	2	1 never	1 never	4	3	5 totally	2	4	3	3	1 not at all true	4	4	3	2	4	3	1	3	1	4	2	3	5	3	3	5	4	3	5	4	2
2024/01/23 7:59:04 AM CET	Administrative sector worker	Female	Surgery	11-15	Worker	46-50	Single	2-3 times per week	1 not at all	3	2 seldom	2 seldom	5 totally	4	4	2	2	4	4	4	2	3	2	2	3	2	2	3	2	3	1	5	4	3	2	2	5	1	4	5	5
2024/01/23 7:59:15 AM CET	Physician	Male	Internal medicine	6-10	Manager	35-40	Married/in a relationship	0-1 times per week	1 not at all	3	1 never	1 never	4	4	4	2	1 not at all	1 not at all true	2	1 not at all true	1 not at all true	4	4	4	4	3	3	2	1	3	4	3	5	1	2	5	5	2	5	2	3
2024/01/23 7:59:35 AM CET	Nurse	Female	Surgery e ostetricia	6-10	manager	26-30	Married/in a relationship	0-1 times per week	4	1 not at all	1 never	1 never	4	4	5 totally	4	3	4	2	3	3	3	2	3	3	2	3	2	3	3	3	3	4	4	3	4	3	4	4	2	1
2024/01/23 7:59:37 AM CET	Nurse	Female	Internal medicine	> 20	executive	51-55	Married/in a relationship	0-1 times per week	2	4	1 never	1 never	5 totally	3	4	4	3	3	3	4	3	4	4	4	4	4	3	3	4	4	3	3	5	1	4	3	5	2	3	3	4
2024/01/23 7:59:43 AM CET	Administrative sector worker	Female	Surgery	11-15	Worker	56-60	Married/in a relationship	0-1 times per week	2	3	2 seldom	2 seldom	4	4	4	4	3	4	4	3	3	3	4	3	3	2	3	3	2	3	4	2	5	3	4	1	5	3	4	1	3
2024/01/23 8:00:04 AM CET	Nurse	Female	Outpatient	> 20	Worker	51-55	Married/in a relationship	2-3 times per week	5 totally	4	4 often	1 never	4	4	5 totally	4	5 totally	4	3	3	2	3	2	3	2	3	3	3	3	3	2	3	5	1	3	2	5	3	3	3	3
2024/01/23 8:00:21 AM CET	Trm	Female	Services	6-10	Worker	31-35	Single	0-1 times per week	1 not at all	2	3 sometimes	3 sometimes	4	4	4	2	1 not at all	3	2	3	2	3	2	1	1	2	2	4	2	4	2	5	5	3	2	3	5	3	5	2	5
2024/01/23 8:00:21 AM CET	Administrative sector worker	Female	Administration	6-10	Executive	51-55	Married/in a relationship	0-1 times per week	4	2	4 often	1 never	4	4	3	3	4	1 not at all true	1 not at all true	1 not at all true	1 not at all true	4	3	2	4	3	4	4	3	4	4	3	5	1	4	4	4	3	4	2	4
2024/01/23 8:00:35 AM CET	Nurse	Male	Emergency medicine	6-10	manager	31-35	Married/in a relationship	0-1 times per week	2	1 not at all	2 seldom	1 never	3	3	4	2	2	3	3	2	2	2	3	2	3	2	3	3	2	3	2	4	4	3	2	4	3	3	4	3	3
2024/01/23 8:00:46 AM CET	Nurse	Male	Administration	> 20	executive	51-55	Married/in a relationship	0-1 times per week	2	3	1 never	1 never	3	2	2	4	2	1 not at all true	1 not at all true	1 not at all true	2	4	3	3	4	2	4	3	2	3	2	3	5	3	2	4	3	4	5	4	5
2024/01/23 8:00:49 AM CET	Nurse	Female	sala operatoria	6-10	manager	31-35	Married/in a relationship	0-1 times per week	3	2	1 never	1 never	2	2	2	1 not at all	2	3	1 not at all true	1 not at all true	1 not at all true	3	3	3	3	3	3	3	3	3	2	4	4	2	4	4	4	3	5	2	3
2024/01/23 8:00:53 AM CET	Nurse	Female	Outpatient	> 20	manager	51-55	Single	2-3 times per week	3	1 not at all	2 seldom	1 never	3	3	3	3	3	4	4	5 totally true	5 totally true	4	4	4	4	4	4	3	4	4	4	4	5	1	5	3	4	5	5	3	5
2024/01/23 8:00:55 AM CET	Physician	Female	Services	6-10	manager	31-35	Married/in a relationship	2-3 times per week	3	1 not at all	3 sometimes	2 seldom	4	4	4	4	1 not at all	4	3	3	3	4	4	4	4	3	4	4	4	4	3	4	5	1	3	1	4	2	5	3	5
2024/01/23 8:00:56 AM CET	Nurse	Female	Surgery	11-15	Worker	35-40	Married/in a relationship	0-1 times per week	1 not at all	3	1 never	1 never	4	4	4	4	2	2	2	2	2	4	4	3	3	3	4	4	4	4	4	5	5	5	5	5	3	2	4	1	3
2024/01/23 8:01:14 AM CET	Administrative sector worker	Female	Surgery	6-10	Worker	35-40	Married/in a relationship	2-3 times per week	4	1 not at all	1 never	2 seldom	4	5 totally	5 totally	4	4	2	2	3	3	3	2	2	2	2	2	3	2	3	2	5	5	2	4	2	3	1	4	2	4
2024/01/23 8:01:14 AM CET	Direttore Lavori	Male	Tecnical sector	0-5	Worker	56-60	Single	0-1 times per week	3	1 not at all	3 sometimes	2 seldom	4	3	4	4	4	2	2	3	1 not at all true	3	3	2	3	3	2	3	3	3	3	4	3	3	3	4	4	3	4	3	3
2024/01/23 8:01:56 AM CET	Hospitality staff	Female	Hospitality	11-15	Worker	56-60	Single	2-3 times per week	5 totally	4	1 never	1 never	4	5 totally	5 totally	5 totally	4	4	3	3	3	4	3	3	4	3	4	4	4	4	3	4	5	1	3	3	3	1	5	3	3
2024/01/23 8:02:38 AM CET	Physician	Male	services	> 20	executive	51-55	Married/in a relationship	0-1 times per week	3	2	2 seldom	2 seldom	4	4	4	5 totally	2	5 totally true	4	3	2	3	4	3	3	3	4	4	4	4	3	2	5	1	3	1	4	4	5	3	5
2024/01/23 8:03:24 AM CET	Technician	Female	Tecnical sector	6-10	Worker	35-40	Married/in a relationship	0-1 times per week	1 not at all	1 not at all	3 sometimes	3 sometimes	4	3	5 totally	3	4	3	1 not at all true	3	3	2	2	3	2	2	2	2	3	3	2	4	4	2	2	3	3	3	4	3	2
2024/01/23 8:04:06 AM CET	Administrative sector worker	Female	Internal medicineenterologia	> 20	Worker	51-55	Married/in a relationship	0-1 times per week	3	2	1 never	1 never	4	4	4	3	4	4	4	4	4	2	2	2	2	3	2	2	2	2	2	2	4	4	2	3	4	3	4	4	3
2024/01/23 8:04:09 AM CET	Technician	Male	Tecnical sector	11-15	Worker	56-60	Single	0-1 times per week	1 not at all	1 not at all	1 never	1 never	2	1 not at all	1 not at all	2	3	1 not at all true	1 not at all true	2	1 not at all true	2	3	2	2	2	2	2	2	3	2	4	5	3	3	3	4	2	4	3	4
2024/01/23 8:04:23 AM CET	Architetto	Female	Tecnical sector	6-10	Worker	35-40	Married/in a relationship	2-3 times per week	4	2	2 seldom	1 never	4	4	5 totally	4	4	3	3	3	4	3	3	3	2	4	3	3	3	2	3	3	4	3	3	2	3	3	3	3	2
2024/01/23 8:05:00 AM CET	Physician	Male	Surgery	> 20	Executive	56-60	Single	0-1 times per week	2	3	3 sometimes	1 never	4	4	4	4	3	2	3	2	3	3	2	3	3	3	2	3	3	2	3	5	4	4	4	1	3	2	3	4	5
2024/01/23 8:05:14 AM CET	Nurse	Male	Intensive care medicine	> 20	manager	>60	Married/in a relationship	0-1 times per week	2	3	1 never	1 never	4	2	4	4	3	2	4	4	2	3	3	2	3	3	3	3	3	3	3	5	5	2	4	4	4	4	5	3	3
2024/01/23 8:05:24 AM CET	Nurse	Male	Intensive care medicine	> 20	manager	46-50	Married/in a relationship	0-1 times per week	1 not at all	2	1 never	1 never	5 totally	5 totally	5 totally	5 totally	5 totally	3	3	5 totally true	4	4	4	4	4	4	4	4	4	4	4	3	5	3	5	3	5	4	3	2	5
2024/01/23 8:05:40 AM CET	Technician	Male	Services	11-15	Tecnico di services	35-40	Married/in a relationship	2-3 times per week	3	3	1 never	1 never	3	3	4	3	2	2	2	2	1 not at all true	4	3	2	3	3	2	2	2	2	3	2	4	3	3	4	5	4	3	3	4
2024/01/23 8:05:48 AM CET	Nurse	Male	Emergency medicine	11-15	Worker	31-35	Married/in a relationship	0-1 times per week	5 totally	5 totally	1 never	1 never	4	4	4	3	3	3	3	2	3	4	3	3	3	2	3	3	3	3	3	4	5	3	3	4	4	2	4	2	5
2024/01/23 8:06:39 AM CET	Administrative sector worker	Female	Malattie infettive	0-5	Worker	31-35	Married/in a relationship	0-1 times per week	3	3	3 sometimes	3 sometimes	4	4	5 totally	4	4	2	2	5 totally true	4	4	2	2	1	1	2	2	1	3	3	4	5	3	3	1	2	3	4	2	5
2024/01/23 8:06:55 AM CET	Technician	Male	Tecnical sector	0-5	Worker	35-40	Single	2-3 times per week	3	1 not at all	1 never	1 never	3	5 totally	4	4	2	2	2	4	4	2	2	3	2	3	2	2	2	2	4	3	5	2	3	5	4	3	5	2	3
2024/01/23 8:07:27 AM CET	Physician	Female	Surgery	16-20	manager	41-45	Married/in a relationship	2-3 times per week	4	2	1 never	1 never	4	4	4	4	3	2	5 totally true	3	3	2	2	1	2	3	1	4	1	2	2	1	5	2	2	4	5	4	5	3	5
2024/01/23 8:07:37 AM CET	Nurse	Female	Intensive care medicine	> 20	manager	56-60	Single	2-3 times per week	4	1 not at all	4 often	4 often	3	3	4	4	3	4	1 not at all true	2	3	3	3	3	2	3	2	2	3	4	3	4	5	1	4	1	4	2	5	2	5
2024/01/23 8:07:39 AM CET	Physician	Male	Internal medicine	6-10	sostituto manager	31-35	Single	0-1 times per week	2	3	1 never	1 never	3	3	4	3	3	1 not at all true	3	2	2	4	4	2	4	3	3	4	3	3	4	5	5	2	5	3	3	1	4	1	2
2024/01/23 8:08:22 AM CET	Nurse	Female	Administration	16-20	Worker	35-40	Single	2-3 times per week	2	1 not at all	1 never	1 never	3	3	3	3	3	2	2	1 not at all true	1 not at all true	4	3	2	4	4	2	4	3	3	3	5	4	4	3	2	3	1	4	2	5
2024/01/23 8:08:33 AM CET	Technician	Male	Tecnical sector	> 20	Executive	51-55	Married/in a relationship	0-1 times per week	4	4	4 often	3 sometimes	4	4	4	4	5 totally	3	3	3	3	4	4	4	4	3	4	4	4	4	4	2	4	4	5	1	4	2	4	2	5
2024/01/23 8:08:37 AM CET	Physician	Female	Surgery	0-5	Worker	26-30	Married/in a relationship	2-3 times per week	3	2	3 sometimes	4 often	4	5 totally	5 totally	5 totally	2	4	4	4	4	4	4	3	4	4	3	4	3	4	4	4	4	1	4	1	2	1	4	1	5
2024/01/23 8:09:01 AM CET	Physician	Female	Internal medicine	11-15	executive	35-40	Married/in a relationship	2-3 times per week	4	1 not at all	1 never	1 never	3	3	4	3	5 totally	1 not at all true	1 not at all true	1 not at all true	1 not at all true	3	3	3	4	2	4	4	4	4	3	2	4	1	3	3	5	2	4	3	5
2024/01/23 8:09:49 AM CET	Administrative sector worker	Female	Internal medicine	6-10	Worker	31-35	Single	4-5 times per week	3	2	2 seldom	2 seldom	2	3	3	3	3	1 not at all true	1 not at all true	1 not at all true	1 not at all true	2	3	0	4	3	4	4	3	4	3	5	5	1	3	1	2	1	5	3	5
2024/01/23 8:09:56 AM CET	Administrative sector worker	Female	Internal medicine	6-10	Worker	26-30	Married/in a relationship	0-1 times per week	1 not at all	3	1 never	1 never	3	3	3	3	1 not at all	2	3	4	5 totally true	4	3	0	2	4	2	4	2	3	3	4	5	1	5	3	4	1	5	1	1
2024/01/23 8:10:30 AM CET	Physician	Female	internal medicine	6-10	manager	31-35	Married/in a relationship	0-1 times per week	2	1 not at all	1 never	1 never	4	3	3	3	1 not at all	2	2	1 not at all true	1 not at all true	4	2	1	3	2	3	3	3	3	3	5	3	3	3	3	2	3	4	4	3
2024/01/23 8:10:31 AM CET	Nurse	Male	Internal medicine	0-5	Worker	26-30	Single	2-3 times per week	3	1 not at all	1 never	1 never	5 totally	5 totally	5 totally	4	4	3	4	4	4	4	3	2	4	3	3	4	3	3	3	3	4	1	4	1	3	2	3	2	4
2024/01/23 8:10:37 AM CET	Apprendista worker	Female	Services	0-5	Apprendista	18-25	Single	0-1 times per week	1 not at all	3	1 never	1 never	2	2	2	4	2	2	2	3	2	1	1	0	0	1	2	1	2	2	2	4	3	2	1	4	2	2	4	3	1
2024/01/23 8:11:12 AM CET	Physician	Male	IoSi	0-5	Worker	26-30	Single	0-1 times per week	5 totally	1 not at all	1 never	1 never	5 totally	5 totally	5 totally	5 totally	4	5 totally true	5 totally true	5 totally true	5 totally true	4	4	3	4	4	4	3	4	4	4	4	5	2	4	1	3	1	5	2	5
2024/01/23 8:11:15 AM CET	Administrative sector worker	Male	Administration	6-10	Executive	56-60	Married/in a relationship	0-1 times per week	4	1 not at all	3 sometimes	1 never	4	4	4	4	2	4	2	4	2	4	4	3	4	4	4	4	4	4	4	4	4	3	5	5	3	1	3	3	3
2024/01/23 8:11:21 AM CET	Administrative sector worker	Female	Administration	> 20	Worker	46-50	Single	0-1 times per week	4	2	3 sometimes	3 sometimes	4	4	4	3	3	3	2	3	3	3	3	3	3	3	3	3	3	3	3	4	4	3	3	2	4	3	4	3	3
2024/01/23 8:11:28 AM CET	Physician	Male	Cardiologia	0-5	Worker	26-30	Single	0-1 times per week	2	3	2 seldom	1 never	4	3	3	2	1 not at all	4	1 not at all true	1 not at all true	1 not at all true	3	1	3	3	3	3	2	1	2	3	5	4	3	4	4	2	4	4	2	3
2024/01/23 8:12:18 AM CET	Administrative sector worker	Male	Emergency medicine	6-10	Worker	31-35	Single	2-3 times per week	4	5 totally	1 never	1 never	3	3	3	3	3	3	3	5 totally true	5 totally true	3	4	4	3	3	3	4	3	3	3	3	4	2	5	3	3	2	4	4	4
2024/01/23 8:12:46 AM CET	Physician	Female	Cure palliative	6-10	manager	35-40	Married/in a relationship	0-1 times per week	4	1 not at all	1 never	1 never	4	3	4	5 totally	2	2	4	4	3	3	2	2	2	3	3	2	2	3	3	1	4	2	2	1	5	3	3	2	2
2024/01/23 8:12:55 AM CET	Administrative sector worker	Female	Administration	> 20	Worker	51-55	Single	0-1 times per week	2	1 not at all	1 never	1 never	4	4	4	2	2	2	2	3	2	4	3	4	3	3	3	3	3	3	3	3	5	3	4	3	5	3	4	3	3
2024/01/23 8:13:28 AM CET	Administrative sector worker	Female	Outpatient	0-5	Worker	18-25	Single	0-1 times per week	1 not at all	1 not at all	2 seldom	1 never	5 totally	5 totally	5 totally	4	4	5 totally true	5 totally true	5 totally true	5 totally true	4	4	3	3	4	3	4	4	4	4	5	5	1	4	3	1	1	5	3	3
2024/01/23 8:13:37 AM CET	Physician	Female	Emergency medicine	16-20	Manager	41-45	Married/in a relationship	2-3 times per week	1 not at all	1 not at all	2 seldom	1 never	5 totally	5 totally	5 totally	2	3	4	4	4	4	4	2	3	4	3	3	3	3	2	2	5	3	3	5	4	3	2	1	1	4
2024/01/23 8:13:39 AM CET	Physician	Male	Surgery e ostetricia	> 20	Executive	46-50	Married/in a relationship	2-3 times per week	3	4	2 seldom	1 never	4	4	4	4	4	4	3	4	4	4	4	2	4	3	4	4	4	4	4	4	5	2	5	3	3	5	5	3	5
2024/01/23 8:13:54 AM CET	Nurse	Female	Surgery	0-5	Worker	26-30	Married/in a relationship	0-1 times per week	2	1 not at all	1 never	1 never	4	4	3	3	3	2	2	2	2	3	2	2	2	2	2	3	2	3	3	2	4	3	2	5	3	2	4	3	4
2024/01/23 8:14:03 AM CET	Administrative sector worker	Male	Acquisti	6-10	Worker	51-55	Married/in a relationship	0-1 times per week	4	1 not at all	1 never	1 never	4	4	4	4	4	1 not at all true	1 not at all true	1 not at all true	1 not at all true	4	4	4	4	4	4	4	4	4	4	5	5	1	5	3	5	1	5	3	4
2024/01/23 8:14:33 AM CET	Technician	Male	Technical sector	> 20	Executive	>60	Married/in a relationship	2-3 times per week	5 totally	1 not at all	1 never	1 never	4	4	4	4	5 totally	3	4	3	4	4	3	4	4	4	3	4	3	3	4	2	4	3	4	1	3	2	5	3	5
2024/01/23 8:14:38 AM CET	Nurse	Male	Internal medicine	11-15	executive	31-35	Single	2-3 times per week	2	1 not at all	2 seldom	1 never	4	3	4	4	4	5 totally true	5 totally true	3	4	4	4	4	4	4	4	4	2	4	3	5	5	4	5	5	5	3	4	2	5
2024/01/23 8:14:49 AM CET	Physician	Male	Anaesthesia	11-15	manager	41-45	Married/in a relationship	4-5 times per week	3	1 not at all	3 sometimes	1 never	1 not at all	1 not at all	1 not at all	1 not at all	1 not at all	1 not at all true	1 not at all true	1 not at all true	1 not at all true	4	4	4	4	3	4	3	4	4	3	3	5	1	3	2	5	1	5	2	5
2024/01/23 8:15:09 AM CET	Technician	Male	Tecnical sector	6-10	Executive	51-55	Married/in a relationship	0-1 times per week	2	4	4 often	4 often	4	4	4	3	2	4	3	2	3	3	2	3	1	1	3	2	3	3	3	3	4	2	2	4	5	2	4	3	4
2024/01/23 8:15:49 AM CET	Nurse	Female	Cure palliative	11-15	Worker	31-35	Married/in a relationship	2-3 times per week	2	1 not at all	3 sometimes	2 seldom	4	4	4	4	4	2	4	3	4	3	3	3	4	3	3	3	3	3	3	3	4	1	3	3	5	3	5	3	3
2024/01/23 8:16:57 AM CET	Physician	Male	Internal medicine	> 20	Executive	56-60	Single	2-3 times per week	4	1 not at all	1 never	1 never	4	4	4	4	4	3	3	4	4	4	3	4	4	4	4	3	3	3	3	5	5	1	5	1	4	2	5	2	4
2024/01/23 8:17:02 AM CET	Hospitality staff	Male	Ristorante	11-15	Worker	56-60	Married/in a relationship	0-1 times per week	2	1 not at all	1 never	1 never	3	3	3	4	4	2	2	2	1 not at all true	2	3	1	0	1	2	2	3	3	0	1	4	4	1	1	5	2	2	4	2
2024/01/23 8:17:27 AM CET	Administrative sector worker	Female	Administration	0-5	Manager	26-30	Married/in a relationship	0-1 times per week	4	2	1 never	1 never	3	3	3	3	4	2	2	2	1 not at all true	3	3	1	2	2	3	3	1	3	2	5	3	4	2	5	2	2	4	2	4
2024/01/23 8:18:13 AM CET	Physician	Male	Administration	> 20	Executive	>60	Single	2-3 times per week	4	3	3 sometimes	1 never	4	3	4	4	4	2	2	2	2	4	3	3	3	3	3	3	3	3	3	4	4	1	3	1	2	1	4	3	4
2024/01/23 8:18:44 AM CET	Physician	Male	Emergency medicine	11-15	manager	41-45	Married/in a relationship	2-3 times per week	4	1 not at all	1 never	1 never	4	4	5 totally	2	5 totally	4	3	3	3	4	4	4	3	3	4	4	4	4	3	3	5	3	4	1	5	4	4	2	5
2024/01/23 8:19:08 AM CET	Worker	Female	Internal medicine	0-5	Worker	35-40	Married/in a relationship	2-3 times per week	3	3	1 never	1 never	3	3	3	3	2	4	4	4	3	3	3	3	1	2	2	3	3	3	3	3	4	2	4	4	4	2	4	2	2
2024/01/23 8:19:42 AM CET	Worker	Female	farmacia	11-15	worker	41-45	Married/in a relationship	2-3 times per week	3	4	2 seldom	3 sometimes	5 totally	5 totally	5 totally	4	5 totally	3	1 not at all true	3	5 totally true	3	1	1	3	0	3	4	3	4	1	3	5	1	3	1	4	1	5	2	5
2024/01/23 8:19:54 AM CET	Administrative sector worker	Male	Administration	6-10	Worker	26-30	Single	0-1 times per week	4	3	1 never	1 never	4	4	4	3	4	2	4	2	4	4	4	3	3	3	3	3	4	4	4	2	5	4	5	4	5	3	4	1	5
2024/01/23 8:20:10 AM CET	Physician	Male	Surgery	> 20	Executive	56-60	Married/in a relationship	0-1 times per week	2	2	1 never	1 never	3	4	5 totally	5 totally	3	4	1 not at all true	2	2	2	3	1	1	3	2	4	3	2	3	3	4	4	3	1	3	2	5	4	4
2024/01/23 8:20:14 AM CET	Administrative sector worker	Female	Internal medicine	> 20	Worker	35-40	Married/in a relationship	2-3 times per week	3	2	2 seldom	2 seldom	3	3	4	4	5 totally	3	2	4	2	3	2	1	3	3	3	4	3	4	3	4	4	2	4	4	2	2	4	2	2
2024/01/23 8:21:05 AM CET	Technician	Male	Technical sector	> 20	Executive	>60	Married/in a relationship	0-1 times per week	3	1 not at all	1 never	1 never	5 totally	5 totally	5 totally	5 totally	4	5 totally true	4	4	4	3	3	1	3	3	3	3	4	3	3	5	5	4	4	1	3	1	5	1	4
2024/01/23 8:21:57 AM CET	Physician	Male	Internal medicine	> 20	Executive	56-60	Married/in a relationship	2-3 times per week	4	1 not at all	1 never	1 never	4	4	3	3	3	4	2	2	2	4	4	2	3	3	3	4	3	4	2	3	4	1	3	2	2	3	4	3	4
2024/01/23 8:21:59 AM CET	Levatrice	Female	Surgery e ostetricia	> 20	Worker	46-50	Married/in a relationship	0-1 times per week	3	1 not at all	2 seldom	1 never	4	3	3	2	3	3	2	4	4	4	3	3	1	2	4	3	3	3	2	4	5	4	3	2	3	3	3	3	5
2024/01/23 8:22:42 AM CET	Physician	Female	Emergency medicine	6-10	manager	35-40	Married/in a relationship	0-1 times per week	1 not at all	3	2 seldom	2 seldom	4	1 not at all	3	1 not at all	1 not at all	3	2	3	1 not at all true	4	4	4	4	4	4	4	3	4	3	3	5	2	4	1	5	3	3	3	4
2024/01/23 8:23:06 AM CET	Nurse	Male	Emergency medicine	0-5	Worker	31-35	Single	2-3 times per week	2	1 not at all	1 never	1 never	2	2	2	4	1 not at all	3	1 not at all true	2	2	3	3	1	2	1	4	3	2	3	3	5	4	3	3	2	2	2	4	3	4
2024/01/23 8:23:21 AM CET	Nurse	Female	Internal medicine	11-15	Worker	31-35	Married/in a relationship	0-1 times per week	1 not at all	1 not at all	3 sometimes	2 seldom	4	4	5 totally	1 not at all	2	3	3	4	4	2	2	0	2	2	3	2	0	4	2	3	5	4	2	1	5	4	4	3	5
2024/01/23 8:23:26 AM CET	Physician	Male	Internal medicine	6-10	Worker	31-35	Single	0-1 times per week	1 not at all	1 not at all	1 never	1 never	5 totally	4	3	2	1 not at all	2	4	1 not at all true	1 not at all true	3	2	3	2	2	1	2	1	2	4	1	5	2	2	3	5	1	3	1	3
2024/01/23 8:23:47 AM CET	Technician	Female	Technical sector	> 20	Trm	41-45	Married/in a relationship	2-3 times per week	3	3	1 never	1 never	4	4	4	2	4	2	2	1 not at all true	1 not at all true	3	3	3	3	2	3	4	3	3	3	3	5	2	3	2	4	2	4	3	2
2024/01/23 8:24:01 AM CET	Physician	Male	Internal medicine	> 20	Executive	51-55	Married/in a relationship	4-5 times per week	2	2	2 seldom	1 never	4	4	5 totally	4	3	4	5 totally true	4	3	4	4	1	4	3	4	3	4	3	3	4	5	1	5	1	5	2	5	2	5
2024/01/23 8:24:13 AM CET	Nurse	Male	Anaesthesia	16-20	executive	41-45	Married/in a relationship	0-1 times per week	3	1 not at all	1 never	1 never	2	1 not at all	2	1 not at all	2	4	4	1 not at all true	1 not at all true	3	3	0	0	2	3	3	2	3	1	3	5	3	1	5	5	3	5	4	4
2024/01/23 8:24:21 AM CET	Technician	Female	Technical sector	> 20	Executive	41-45	Married/in a relationship	0-1 times per week	3	3	1 never	1 never	5 totally	5 totally	5 totally	3	1 not at all	3	3	3	3	4	4	4	4	4	4	4	3	4	4	3	5	1	4	3	5	3	5	1	3
2024/01/23 8:24:55 AM CET	Levatrice	Female	Surgery e ostetricia	0-5	Levatrice	18-25	Single	2-3 times per week	3	1 not at all	1 never	1 never	5 totally	5 totally	5 totally	4	3	3	3	4	4	4	3	2	4	3	4	4	3	4	3	2	5	3	3	1	5	1	5	5	4
2024/01/23 8:25:17 AM CET	Nurse	Female	Outpatient	6-10	manager	31-35	Single	0-1 times per week	5 totally	2	4 often	5 very often	3	3	4	3	5 totally	2	2	2	3	4	4	4	4	4	4	4	4	4	4	5	5	2	5	2	5	2	5	1	3
2024/01/23 8:25:19 AM CET	Administrative sector worker	Female	Surgery e ostetricia	0-5	Worker	26-30	Single	0-1 times per week	3	2	2 seldom	1 never	4	4	4	4	3	3	2	2	2	3	3	3	2	2	3	2	2	3	4	4	5	3	4	2	4	2	4	1	4
2024/01/23 8:25:42 AM CET	Physician	Male	internal medicine	> 20	Executive	46-50	Married/in a relationship	2-3 times per week	3	1 not at all	4 often	4 often	4	4	4	3	3	3	4	3	3	3	2	3	3	3	3	3	3	3	3	3	5	1	3	1	4	4	4	3	4
2024/01/23 8:26:00 AM CET	Administrative sector worker	Female	Intensive care medicine	6-10	Worker	41-45	Married/in a relationship	0-1 times per week	2	1 not at all	1 never	1 never	5 totally	5 totally	5 totally	5 totally	4	5 totally true	2	5 totally true	5 totally true	2	2	0	2	4	4	3	3	4	3	5	5	2	3	2	5	2	5	1	2
2024/01/23 8:26:05 AM CET	Physician	Male	Outpatient	0-5	Worker	31-35	Single	2-3 times per week	3	3	1 never	1 never	4	4	4	4	2	3	3	3	3	4	3	2	3	2	3	3	3	3	3	4	4	2	3	2	3	2	4	3	3
2024/01/23 8:26:15 AM CET	Physician	Female	Anaesthesia	> 20	Executive	46-50	Married/in a relationship	4-5 times per week	4	3	1 never	1 never	4	3	3	4	4	5 totally true	5 totally true	3	4	4	4	2	3	4	4	3	3	4	3	2	5	1	3	3	3	3	4	4	4
2024/01/23 8:26:18 AM CET	Nurse	Female	Cure palliative	16-20	Worker	35-40	Married/in a relationship	0-1 times per week	3	4	1 never	1 never	4	5 totally	5 totally	4	3	4	4	2	2	3	2	2	0	2	3	3	2	4	4	3	5	3	3	1	3	1	5	4	5
2024/01/23 8:26:20 AM CET	administrative sector worker	Female	Administration	> 20	Executive	46-50	Married/in a relationship	0-1 times per week	4	2	1 never	1 never	5 totally	5 totally	5 totally	4	3	2	2	2	4	3	4	3	4	3	3	4	4	4	3	3	5	4	4	2	5	2	3	2	5
2024/01/23 8:26:54 AM CET	Physician	Female	Surgery	0-5	Worker	26-30	Single	0-1 times per week	2	3	3 sometimes	1 never	4	4	4	3	1 not at all	3	3	4	5 totally true	4	4	3	4	3	4	3	3	4	3	5	4	1	3	1	4	1	4	1	5
2024/01/23 8:28:42 AM CET	Nurse	Female	Internal medicine	11-15	Worker	41-45	Married/in a relationship	0-1 times per week	2	4	3 sometimes	3 sometimes	3	2	2	3	3	2	2	1 not at all true	1 not at all true	4	4	2	4	4	3	3	2	1	2	5	4	2	3	1	3	3	3	2	5
2024/01/23 8:28:54 AM CET	Physician	Female	Emergency medicine	11-15	Executive	35-40	Married/in a relationship	0-1 times per week	3	3	3 sometimes	3 sometimes	2	2	2	2	3	3	4	3	3	4	3	4	4	3	3	4	3	4	3	3	4	3	4	3	3	4	3	2	4
2024/01/23 8:31:01 AM CET	Nurse	Female	internal medicine, internal medicine, emato-internal medicine	> 20	manager	41-45	Married/in a relationship	0-1 times per week	5 totally	3	3 sometimes	3 sometimes	4	4	4	3	4	4	3	2	4	3	4	3	4	3	4	3	3	4	3	4	4	2	4	1	3	1	4	1	5
2024/01/23 8:31:23 AM CET	Nurse	Female	internal medicine	0-5	Worker	18-25	Single	0-1 times per week	4	4	3 sometimes	2 seldom	5 totally	5 totally	5 totally	3	4	5 totally true	4	5 totally true	5 totally true	4	3	1	3	1	3	3	2	3	1	3	5	1	1	3	5	1	5	1	3
2024/01/23 8:31:35 AM CET	Administrative sector worker	Female	Internal medicine	> 20	Worker	51-55	Married/in a relationship	2-3 times per week	4	1 not at all	3 sometimes	3 sometimes	4	4	3	3	4	3	3	3	3	3	4	3	3	2	3	4	2	3	3	5	5	1	4	2	5	2	4	2	5
2024/01/23 8:32:23 AM CET	Technician	Female	Technical sector	11-15	Worker	35-40	Married/in a relationship	0-1 times per week	2	1 not at all	1 never	1 never	2	3	4	3	2	4	4	3	1 not at all true	3	2	0	2	2	1	1	1	0	1	4	5	4	2	5	5	5	3	5	5
2024/01/23 8:32:26 AM CET	worker	Female	Cardiologia	> 20	worker	41-45	Married/in a relationship	0-1 times per week	4	4	3 sometimes	1 never	3	3	4	4	3	3	3	4	4	4	2	2	2	2	3	3	2	3	3	3	4	2	3	2	4	2	4	3	2
2024/01/23 8:32:34 AM CET	Administrative sector worker	Female	Administration	16-20	Worker	41-45	Married/in a relationship	2-3 times per week	3	2	1 never	1 never	4	4	3	4	5 totally	4	4	3	3	3	3	4	4	4	3	2	2	2	2	5	4	1	3	4	5	3	3	4	3
2024/01/23 8:33:06 AM CET	Administrative sector worker	Female	Internal medicine	11-15	Worker	41-45	Single	0-1 times per week	3	1 not at all	1 never	1 never	4	4	4	4	4	2	2	5 totally true	5 totally true	4	4	3	4	3	3	3	3	4	3	5	4	4	4	1	3	4	4	5	4
2024/01/23 8:33:08 AM CET	TRM, technician di services	Female	Services	0-5	Worker	26-30	Married/in a relationship	0-1 times per week	3	4	2 seldom	1 never	4	4	4	3	3	2	2	1 not at all true	1 not at all true	3	3	3	2	3	2	3	3	3	3	3	5	3	3	2	4	3	4	2	4
2024/01/23 8:33:15 AM CET	Administrative sector worker	Female	Administration	11-15	Worker	56-60	Single	0-1 times per week	5 totally	3	1 never	1 never	3	3	3	3	5 totally	2	2	3	2	3	3	4	3	3	3	3	3	3	3	5	5	4	4	3	3	2	4	3	4
2024/01/23 8:33:51 AM CET	Nurse	Female	Emergency medicine	6-10	manager	31-35	Married/in a relationship	2-3 times per week	3	1 not at all	2 seldom	2 seldom	2	2	3	1 not at all	2	3	1 not at all true	2	2	3	3	3	3	4	4	4	4	4	4	1	5	1	4	2	5	3	5	5	2
2024/01/23 8:34:04 AM CET	Nurse	Male	Intensive care medicine	> 20	manager	>60	Married/in a relationship	0-1 times per week	1 not at all	1 not at all	1 never	1 never	4	4	4	4	2	2	3	1 not at all true	1 not at all true	4	4	0	0	2	3	4	3	4	4	5	5	1	3	1	3	1	5	2	1
2024/01/23 8:34:15 AM CET	Administrative sector worker	Female	Intensive care medicine	16-20	Worker	51-55	Married/in a relationship	0-1 times per week	3	2	2 seldom	2 seldom	4	4	5 totally	4	4	5 totally true	5 totally true	4	4	4	4	4	3	3	4	4	3	3	4	3	4	4	5	3	4	3	2	2	3
2024/01/23 8:34:22 AM CET	Administrative sector worker	Female	Internal medicine	0-5	Worker	51-55	Married/in a relationship	0-1 times per week	4	2	2 seldom	1 never	5 totally	5 totally	5 totally	5 totally	5 totally	5 totally true	3	4	5 totally true	4	3	3	4	4	4	3	4	4	3	4	5	3	4	3	5	2	4	2	3
2024/01/23 8:35:30 AM CET	Administrative sector worker	Female	Otorinolaringoiatria	6-10	Worker	31-35	Single	2-3 times per week	4	4	2 seldom	1 never	4	4	5 totally	4	3	1 not at all true	1 not at all true	2	2	3	2	2	2	2	3	3	3	3	4	5	5	1	3	1	5	1	5	2	5
2024/01/23 8:35:46 AM CET	Physician	Male	Internal medicine	0-5	Worker	31-35	Married/in a relationship	0-1 times per week	2	3	1 never	1 never	3	3	3	2	1 not at all	4	4	5 totally true	3	3	2	0	4	3	1	2	2	3	3	3	4	3	2	1	4	3	3	4	5
2024/01/23 8:35:56 AM CET	Physician	Female	Services	16-20	manager	46-50	Married/in a relationship	0-1 times per week	1 not at all	2	3 sometimes	2 seldom	4	3	3	3	2	4	3	4	4	4	3	3	4	2	3	3	3	3	3	3	4	1	4	1	3	2	4	2	4
2024/01/23 8:35:58 AM CET	Nurse	Female	Outpatient	> 20	manager	51-55	Married/in a relationship	2-3 times per week	4	2	4 often	4 often	4	4	4	5 totally	4	4	4	4	4	4	4	3	4	3	4	3	3	4	4	1	5	1	3	4	5	4	4	3	5
2024/01/23 8:36:16 AM CET	Physician	Female	Surgery	11-15	Executive	41-45	Single	0-1 times per week	2	1 not at all	2 seldom	2 seldom	3	4	4	4	1 not at all	4	3	4	3	2	2	2	3	2	2	3	2	3	1	5	5	3	3	2	3	4	5	4	5
2024/01/23 8:36:41 AM CET	Administrative sector worker	Male	Iosi	0-5	Worker	35-40	Single	0-1 times per week	4	1 not at all	5 very often	1 never	4	4	4	3	2	2	1 not at all true	2	2	3	2	2	4	3	2	1	1	1	4	5	5	4	4	2	3	4	3	1	5
2024/01/23 8:36:42 AM CET	Hospitality staff	Female	Hospitality	> 20	Worker	51-55	Married/in a relationship	4-5 times per week	3	2	1 never	1 never	3	3	3	3	4	4	3	3	3	3	3	3	4	3	4	3	3	4	3	5	5	1	4	4	4	1	4	1	1
2024/01/23 8:36:59 AM CET	Physician	Male	Internal medicine	6-10	Worker	31-35	Single	2-3 times per week	1 not at all	2	2 seldom	1 never	3	2	2	4	1 not at all	2	2	4	2	1	2	2	1	1	3	2	3	3	3	4	4	1	1	5	3	3	4	3	4
2024/01/23 8:37:13 AM CET	Physician	Male	Services	0-5	manager	31-35	Married/in a relationship	0-1 times per week	3	1 not at all	1 never	1 never	4	4	4	3	1 not at all	4	3	5 totally true	2	3	4	0	0	3	2	4	3	3	1	1	4	3	2	4	5	3	3	1	2
2024/01/23 8:37:50 AM CET	Physician	Male	Emergency medicine	11-15	manager	41-45	Married/in a relationship	0-1 times per week	3	2	1 never	1 never	3	3	3	3	3	4	4	4	3	3	3	2	3	3	4	4	3	3	3	3	5	2	4	3	4	3	4	4	4
2024/01/23 8:38:21 AM CET	Administrative sector worker	Female	Administration	16-20	Executive	46-50	Married/in a relationship	0-1 times per week	4	3	1 never	1 never	3	4	4	4	2	1 not at all true	1 not at all true	1 not at all true	1 not at all true	3	3	3	3	3	3	4	3	4	3	3	5	4	2	5	4	2	5	5	4
2024/01/23 8:38:38 AM CET	Nurse	Male	Intensive care medicine	11-15	manager	35-40	Married/in a relationship	0-1 times per week	3	2	3 sometimes	1 never	4	4	4	4	2	4	4	4	5 totally true	4	3	3	4	3	4	4	2	4	3	4	4	2	4	2	3	2	4	2	2
2024/01/23 8:38:52 AM CET	Hospitality staff	Female	Hospitality	> 20	Worker	51-55	Married/in a relationship	2-3 times per week	1 not at all	1 not at all	1 never	1 never	3	2	2	2	2	2	1 not at all true	2	1 not at all true	3	3	3	0	0	3	3	3	3	3	5	5	3	4	5	5	1	3	4	4
2024/01/23 8:39:17 AM CET	Technician	Female	Technical sector	> 20	Executive	56-60	Single	0-1 times per week	3	4	1 never	1 never	4	3	4	4	4	3	3	5 totally true	3	4	3	3	4	3	4	4	2	3	3	3	4	5	4	1	4	5	5	4	5
2024/01/23 8:39:28 AM CET	Physician	Female	Emergency medicine	> 20	Executive	56-60	Married/in a relationship	2-3 times per week	4	1 not at all	3 sometimes	1 never	5 totally	4	4	4	4	5 totally true	4	5 totally true	5 totally true	4	4	4	4	3	4	4	3	4	2	3	5	3	4	1	4	3	4	3	4
2024/01/23 8:39:51 AM CET	Physician	Female	Emergency medicine	16-20	Executive	41-45	Married/in a relationship	0-1 times per week	3	4	1 never	1 never	5 totally	5 totally	4	3	4	4	4	3	3	4	3	3	4	3	3	4	4	3	3	3	4	2	3	4	4	3	4	3	4
2024/01/23 8:40:20 AM CET	worker	Female	Outpatient	0-5	worker	41-45	Married/in a relationship	2-3 times per week	4	1 not at all	4 often	4 often	4	3	4	4	4	4	4	4	4	4	4	4	4	3	4	3	3	4	3	2	4	1	4	2	5	2	4	2	5
2024/01/23 8:41:21 AM CET	Administrative sector worker	Male	Administration	> 20	Manager	56-60	Married/in a relationship	0-1 times per week	4	3	4 often	4 often	3	3	3	3	4	3	3	2	2	3	3	3	3	2	3	3	3	3	3	4	5	2	4	2	5	2	5	2	5
2024/01/23 8:42:27 AM CET	Nurse	Female	internal medicine e surgery e ostetricia	> 20	manager	46-50	Married/in a relationship	2-3 times per week	3	1 not at all	1 never	1 never	3	3	4	2	3	3	2	2	2	3	2	1	1	2	2	3	2	2	2	5	4	2	3	5	2	4	5	4	2
2024/01/23 8:43:09 AM CET	worker	Female	Cure palliative	0-5	worker	18-25	Single	more than 5 times per week	3	2	1 never	1 never	5 totally	5 totally	5 totally	5 totally	4	4	5 totally true	5 totally true	5 totally true	4	3	3	3	3	4	3	3	3	3	4	4	1	4	3	5	1	4	2	3
2024/01/23 8:43:13 AM CET	Physician	Female	Internal medicine outpatientale	> 20	manager	46-50	Married/in a relationship	2-3 times per week	4	1 not at all	3 sometimes	3 sometimes	4	4	4	4	5 totally	2	2	2	3	4	3	4	4	3	3	3	3	3	3	4	5	2	4	1	3	1	5	1	2
2024/01/23 8:44:08 AM CET	Technician	Male	Technical sector	11-15	Worker	41-45	Married/in a relationship	2-3 times per week	4	3	3 sometimes	1 never	3	2	2	3	4	1 not at all true	1 not at all true	1 not at all true	1 not at all true	3	3	2	4	3	3	3	3	3	3	4	5	3	3	3	2	3	4	2	3
2024/01/23 8:44:09 AM CET	Physician	Male	Internal medicine, services, università	> 20	Executive	51-55	Married/in a relationship	2-3 times per week	3	2	1 never	1 never	5 totally	5 totally	5 totally	3	5 totally	5 totally true	3	4	5 totally true	3	4	4	1	4	4	4	4	4	3	3	5	1	4	1	3	4	4	3	5
2024/01/23 8:44:49 AM CET	Nurse	Female	Outpatient	> 20	manager I	46-50	Married/in a relationship	4-5 times per week	2	2	3 sometimes	1 never	5 totally	5 totally	5 totally	5 totally	5 totally	5 totally true	2	2	4	4	3	2	2	3	4	4	2	4	3	1	5	1	3	4	5	2	4	3	5
2024/01/23 8:45:33 AM CET	Worker	Female	Serviceso sociale	0-5	Worker	18-25	Single	0-1 times per week	3	2	1 never	1 never	4	3	3	4	3	2	2	2	2	3	3	2	3	2	4	4	3	3	2	4	5	1	3	4	4	2	4	4	2
2024/01/23 8:46:12 AM CET	TRM	Male	Medicina Nucleare	> 20	Executive	>60	Single	2-3 times per week	4	1 not at all	2 seldom	1 never	4	4	5 totally	4	5 totally	4	3	4	3	4	3	3	4	4	3	4	4	4	3	4	5	1	5	4	4	2	5	1	3
2024/01/23 8:46:47 AM CET	Technician	Female	Technical sector	6-10	Worker	31-35	Single	2-3 times per week	4	1 not at all	1 never	1 never	3	3	4	1 not at all	4	1 not at all true	1 not at all true	1 not at all true	1 not at all true	4	4	3	4	4	4	3	4	4	2	2	5	1	4	3	5	3	5	4	4
2024/01/23 8:46:58 AM CET	Physician	Female	Emergency medicine	16-20	manager	41-45	Married/in a relationship	2-3 times per week	5 totally	1 not at all	1 never	1 never	3	1 not at all	4	1 not at all	3	5 totally true	4	3	3	1	1	3	4	2	3	1	1	4	2	5	5	2	3	1	1	4	5	5	5
2024/01/23 8:47:18 AM CET	Nurse	Female	Cure palliative	6-10	manager	31-35	Single	0-1 times per week	3	1 not at all	2 seldom	2 seldom	4	4	4	3	3	5 totally true	5 totally true	4	4	3	4	3	4	3	3	4	3	3	3	4	5	3	4	3	5	5	5	2	5
2024/01/23 8:48:12 AM CET	Nurse	Female	Internal medicineenterologia	> 20	executive	51-55	Married/in a relationship	0-1 times per week	4	4	4 often	4 often	5 totally	5 totally	5 totally	5 totally	3	5 totally true	3	3	4	4	3	3	3	4	3	4	3	4	4	3	5	1	4	1	3	1	5	2	5
2024/01/23 8:48:53 AM CET	Nurse	Female	Emergency medicine	> 20	manager	41-45	Married/in a relationship	2-3 times per week	3	4	4 often	1 never	4	4	4	2	3	3	3	3	3	3	3	3	4	4	4	4	3	4	3	2	4	1	4	1	4	3	4	2	4
2024/01/23 8:49:17 AM CET	Nurse	Female	Anaesthesia	6-10	manager	46-50	Married/in a relationship	2-3 times per week	2	2	4 often	2 seldom	4	3	4	4	2	3	1 not at all true	2	2	3	3	3	2	3	4	2	3	4	3	3	5	3	3	1	3	2	4	1	5
2024/01/23 8:50:00 AM CET	Administrative sector worker	Female	Administration	> 20	Worker	56-60	Single	2-3 times per week	2	2	3 sometimes	4 often	3	3	3	3	1 not at all	3	3	1 not at all true	1 not at all true	4	3	3	4	3	4	3	4	4	4	4	4	2	4	1	4	3	4	3	5
2024/01/23 8:50:34 AM CET	Nurse	Female	Anaesthesia	16-20	manager	41-45	Married/in a relationship	2-3 times per week	3	2	2 seldom	1 never	5 totally	2	3	1 not at all	4	1 not at all true	1 not at all true	1 not at all true	2	4	3	2	4	4	3	4	1	4	3	2	5	2	3	2	5	3	5	3	2
2024/01/23 8:51:07 AM CET	Physician	Male	Internal medicine	11-15	Manager	35-40	Married/in a relationship	0-1 times per week	3	3	1 never	1 never	3	4	4	3	2	3	3	2	2	3	4	2	4	3	4	3	3	4	4	5	5	1	3	4	3	2	4	3	3
2024/01/23 8:51:28 AM CET	psicologa	Female	Internal medicine	> 20	Worker	46-50	Single	2-3 times per week	4	1 not at all	4 often	4 often	3	4	4	5 totally	4	2	1 not at all true	1 not at all true	1 not at all true	4	4	2	4	3	2	2	3	2	3	5	5	2	3	2	3	3	4	2	2
2024/01/23 8:52:41 AM CET	Physician	Male	Anaesthesia	16-20	Executive	46-50	Single	2-3 times per week	2	2	1 never	1 never	4	4	4	3	2	4	2	3	2	2	3	3	3	1	3	3	3	2	2	3	4	3	3	3	3	2	3	2	4
2024/01/23 8:54:57 AM CET	Physician	Female	Emergency medicine	11-15	manager ospedaliero	46-50	Married/in a relationship	4-5 times per week	2	1 not at all	2 seldom	1 never	2	2	2	3	2	2	2	4	3	4	3	3	3	2	3	4	4	3	3	3	5	1	3	2	5	3	5	4	5
2024/01/23 8:55:13 AM CET	Physician	Female	Malattie infettive	16-20	manager	46-50	Single	more than 5 times per week	4	1 not at all	1 never	1 never	4	4	4	4	4	4	4	3	3	3	3	3	2	4	2	3	2	3	2	5	5	1	3	5	1	2	5	3	2
2024/01/23 8:55:18 AM CET	Nurse	Female	EONOSO	> 20	manager	46-50	Married/in a relationship	more than 5 times per week	4	3	1 never	1 never	5 totally	5 totally	5 totally	5 totally	5 totally	2	2	3	3	3	4	3	4	3	4	3	4	4	3	4	5	3	4	5	4	2	4	2	2
2024/01/23 8:55:19 AM CET	Administrative sector worker	Female	Hospitality	6-10	Worker	46-50	Single	4-5 times per week	4	1 not at all	1 never	1 never	4	4	3	3	4	3	2	1 not at all true	1 not at all true	1	4	4	4	3	2	1	4	4	2	4	4	1	3	3	4	3	4	3	3
2024/01/23 8:55:23 AM CET	Technician	Female	Services	16-20	Executive	41-45	Married/in a relationship	2-3 times per week	2	1 not at all	1 never	1 never	4	4	4	4	3	4	2	3	3	4	4	3	4	4	4	4	4	4	4	4	5	1	4	5	4	3	5	4	3
2024/01/23 8:56:18 AM CET	Nurse	Female	Internal medicine	> 20	manager	56-60	Married/in a relationship	2-3 times per week	3	1 not at all	3 sometimes	3 sometimes	2	2	2	3	2	2	3	3	3	3	3	2	2	2	3	3	3	4	2	4	5	2	3	3	3	3	5	2	4
2024/01/23 8:57:35 AM CET	Administrative sector worker	Female	Serviceso Sicurezza EOC	11-15	Worker	46-50	Married/in a relationship	2-3 times per week	1 not at all	4	2 seldom	1 never	3	3	3	2	4	3	3	3	4	2	2	3	3	2	4	2	3	3	3	2	4	5	3	5	4	4	3	3	5
2024/01/23 8:57:52 AM CET	cand. physician	Female	Surgery e ostetricia	0-5	cand. med.	18-25	Single	2-3 times per week	4	4	4 often	4 often	3	2	3	4	4	2	3	3	2	4	3	3	3	3	2	3	2	3	4	3	4	2	4	2	2	2	4	2	4
2024/01/23 8:59:45 AM CET	Worker	Female	Surgery e ostetricia	> 20	Worker	41-45	Married/in a relationship	0-1 times per week	5 totally	1 not at all	1 never	1 never	5 totally	5 totally	5 totally	4	4	4	4	3	3	4	4	4	4	4	4	4	4	4	4	4	5	1	4	1	5	1	5	2	3
2024/01/23 9:01:25 AM CET	Physician	Male	Emergency medicine	0-5	manager	35-40	Single	4-5 times per week	2	1 not at all	1 never	1 never	4	4	4	4	3	4	4	3	3	3	3	4	3	3	3	3	2	3	2	3	3	3	2	3	4	3	4	3	5
2024/01/23 9:02:09 AM CET	Nurse	Female	EONOSO	0-5	Worker	51-55	Single	2-3 times per week	5 totally	3	1 never	1 never	5 totally	5 totally	5 totally	4	5 totally	5 totally true	4	4	4	3	3	0	3	3	3	2	2	3	3	4	4	2	3	2	3	3	4	3	3
2024/01/23 9:02:36 AM CET	Nurse	Female	Emergency medicine	6-10	manager	31-35	Married/in a relationship	0-1 times per week	4	4	1 never	1 never	4	4	5 totally	4	4	4	3	3	4	4	3	2	4	4	4	4	4	4	4	3	5	2	4	2	5	3	4	2	5
2024/01/23 9:03:31 AM CET	Nurse	Female	direzione infermieristica	16-20	executive	35-40	Single	0-1 times per week	3	1 not at all	2 seldom	1 never	4	4	4	4	2	3	4	3	4	3	3	3	3	2	3	3	2	2	3	4	4	3	3	3	3	2	4	3	3
2024/01/23 9:03:50 AM CET	Technician	Male	Technical sector	> 20	Executive	51-55	Married/in a relationship	0-1 times per week	3	3	3 sometimes	2 seldom	4	4	4	3	3	3	4	2	3	3	3	4	4	4	3	3	3	4	3	5	5	1	4	3	3	2	4	2	4
2024/01/23 9:03:59 AM CET	Administrative sector worker	Male	Internal medicine	0-5	Worker	31-35	Married/in a relationship	4-5 times per week	3	2	1 never	1 never	5 totally	4	5 totally	4	3	3	3	4	3	4	4	3	4	3	3	3	3	3	3	4	4	3	4	4	5	2	5	1	3
2024/01/23 9:04:02 AM CET	Nurse	Female	Emergency medicine	11-15	manager	31-35	Married/in a relationship	0-1 times per week	3	1 not at all	4 often	1 never	4	4	4	3	4	3	2	3	3	3	3	3	3	3	3	3	3	3	3	5	5	1	5	4	4	1	4	2	4
2024/01/23 9:04:36 AM CET	Administrative sector worker	Female	Administration	11-15	Executive	31-35	Married/in a relationship	2-3 times per week	3	4	4 often	4 often	4	3	4	4	5 totally	3	3	1 not at all true	1 not at all true	4	4	4	4	4	3	2	4	4	4	3	5	3	4	1	5	1	3	2	5
2024/01/23 9:04:47 AM CET	Administrative sector worker	Male	Internal medicine	11-15	Worker	46-50	Married/in a relationship	2-3 times per week	1 not at all	3	2 seldom	1 never	3	2	3	2	2	1 not at all true	1 not at all true	1 not at all true	1 not at all true	2	2	1	2	2	2	1	1	2	1	4	4	2	2	2	4	4	4	4	3
2024/01/23 9:04:54 AM CET	Nurse	Female	Un serviceso della DG	> 20	manager	51-55	Single	0-1 times per week	1 not at all	3	3 sometimes	3 sometimes	2	2	1 not at all	4	3	2	3	1 not at all true	1 not at all true	3	3	1	2	3	2	2	4	3	2	3	3	2	3	1	4	2	4	2	3
2024/01/23 9:05:03 AM CET	Nurse	Female	Emergency medicine	> 20	manager	51-55	Married/in a relationship	4-5 times per week	3	2	3 sometimes	1 never	4	4	4	4	4	3	3	3	3	4	3	2	3	3	3	2	2	3	3	4	5	1	3	2	4	1	5	2	4
2024/01/23 9:05:17 AM CET	Nurse	Female	Surgery e ostetricia	11-15	manager	41-45	Married/in a relationship	0-1 times per week	2	1 not at all	1 never	1 never	3	3	3	3	2	2	1 not at all true	3	3	3	3	0	3	3	2	3	0	2	0	3	4	1	2	5	3	4	3	5	1
2024/01/23 9:05:46 AM CET	Physician	Male	Surgery	0-5	Worker	18-25	Single	2-3 times per week	3	2	1 never	1 never	4	4	4	4	3	5 totally true	5 totally true	5 totally true	4	3	3	2	4	3	4	2	3	4	3	2	4	2	2	4	4	2	4	2	3
2024/01/23 9:06:13 AM CET	Tecnico Services	Male	Outpatient	11-15	Executive	35-40	Single	2-3 times per week	3	1 not at all	5 very often	5 very often	3	4	4	4	4	4	2	5 totally true	2	4	3	4	4	4	3	4	3	3	4	3	4	1	4	2	4	2	4	2	5
2024/01/23 9:06:49 AM CET	Physician	Male	Surgery	6-10	manager	35-40	Married/in a relationship	0-1 times per week	3	1 not at all	1 never	1 never	3	3	3	1 not at all	3	5 totally true	3	2	2	3	3	2	3	2	4	4	4	3	4	4	5	5	3	1	2	4	5	4	3
2024/01/23 9:07:07 AM CET	Technician	Female	Services	11-15	Worker	35-40	Married/in a relationship	2-3 times per week	2	3	2 seldom	2 seldom	4	3	4	3	2	2	1 not at all true	1 not at all true	1 not at all true	3	2	3	2	3	2	2	1	2	3	2	4	1	4	3	5	2	4	2	5
2024/01/23 9:07:27 AM CET	Physician	Female	Anaesthesia	16-20	Manager	41-45	Married/in a relationship	2-3 times per week	4	4	4 often	3 sometimes	5 totally	5 totally	4	5 totally	2	5 totally true	3	4	1 not at all true	4	2	4	4	3	4	4	3	4	4	3	5	2	5	1	5	2	5	2	5
2024/01/23 9:07:38 AM CET	Physician	Female	Cure palliative	11-15	Worker	35-40	Married/in a relationship	0-1 times per week	1 not at all	2	2 seldom	2 seldom	4	3	4	3	1 not at all	4	2	2	2	3	3	1	3	1	4	2	2	4	3	3	5	1	3	1	3	1	5	1	5
2024/01/23 9:07:43 AM CET	Administrative sector worker	Female	Administration	0-5	Worker	46-50	Married/in a relationship	0-1 times per week	2	3	3 sometimes	1 never	1 not at all	1 not at all	2	2	2	2	1 not at all true	2	1 not at all true	4	2	1	3	3	3	3	2	4	3	5	5	1	3	1	2	1	4	1	1
2024/01/23 9:08:26 AM CET	Physician	Female	internal medicine	> 20	Executive	51-55	Married/in a relationship	0-1 times per week	4	1 not at all	1 never	1 never	5 totally	5 totally	5 totally	3	3	3	3	4	5 totally true	4	4	4	4	4	4	4	3	4	4	1	4	1	3	2	5	2	4	3	5
2024/01/23 9:08:42 AM CET	Nurse	Male	Emergency medicine	6-10	executive	26-30	Married/in a relationship	2-3 times per week	4	2	4 often	2 seldom	4	3	4	4	3	3	3	2	2	4	3	3	4	4	4	4	3	4	3	4	4	2	3	2	3	4	4	3	4
2024/01/23 9:08:49 AM CET	Nurse	Female	Surgery e ostetricia	6-10	manager	31-35	Single	0-1 times per week	2	4	1 never	1 never	3	3	3	3	1 not at all	2	1 not at all true	2	2	4	2	2	3	2	3	3	3	3	3	3	5	3	3	3	4	3	5	2	4
2024/01/23 9:09:23 AM CET	Physician	Female	Internal medicine	0-5	Worker	26-30	Single	2-3 times per week	2	1 not at all	1 never	1 never	4	4	3	3	2	3	2	2	4	3	3	4	3	3	3	3	3	3	3	2	4	2	3	4	5	2	3	2	3
2024/01/23 9:09:44 AM CET	Nurse	Male	Surgery	6-10	Worker	31-35	Married/in a relationship	2-3 times per week	2	2	1 never	1 never	4	3	4	3	2	2	2	1 not at all true	1 not at all true	4	3	4	4	3	3	4	4	3	3	4	5	4	4	2	4	2	5	3	5
2024/01/23 9:09:48 AM CET	Physician	Male	Internal medicine	0-5	Worker	26-30	Single	0-1 times per week	3	1 not at all	2 seldom	1 never	4	4	4	4	2	1 not at all true	1 not at all true	3	1 not at all true	3	3	3	4	4	4	2	4	4	2	1	5	2	4	1	5	3	4	4	5
2024/01/23 9:10:43 AM CET	Physician	Male	Emergency medicine	> 20	Executive	51-55	Single	2-3 times per week	4	1 not at all	1 never	1 never	4	4	3	4	3	3	4	2	3	4	4	3	4	4	4	4	3	4	4	4	5	2	4	3	5	4	5	4	4
2024/01/23 9:10:46 AM CET	Physician	Female	Surgery e ostetricia	0-5	Worker	31-35	Married/in a relationship	0-1 times per week	1 not at all	1 not at all	1 never	1 never	2	2	3	2	1 not at all	1 not at all true	2	1 not at all true	1 not at all true	4	3	2	3	2	3	3	1	3	1	1	5	1	3	1	5	3	4	4	5
2024/01/23 9:11:25 AM CET	segretaria medica	Female	Surgery	6-10	Worker	26-30	Married/in a relationship	0-1 times per week	4	1 not at all	1 never	1 never	3	3	4	4	3	2	2	1 not at all true	1 not at all true	4	3	3	3	4	3	3	4	4	2	1	5	1	4	1	5	1	5	3	5
2024/01/23 9:12:52 AM CET	Tecnico in analisi biomediche (TAB)	Female	Services	> 20	worker	>60	Married/in a relationship	0-1 times per week	4	5 totally	4 often	1 never	4	4	4	3	4	3	3	3	2	4	4	3	4	3	3	4	4	3	3	5	5	3	4	1	4	3	4	2	5
2024/01/23 9:13:25 AM CET	Administrative sector worker	Female	Intensive care medicine	> 20	Worker	26-30	Married/in a relationship	2-3 times per week	3	3	2 seldom	1 never	4	4	4	4	4	4	4	4	5 totally true	3	2	2	3	2	2	3	2	2	2	3	4	1	4	3	4	2	4	2	3
2024/01/23 9:14:05 AM CET	Physician	Male	Internal medicine	6-10	manager	35-40	Married/in a relationship	0-1 times per week	2	1 not at all	1 never	1 never	5 totally	5 totally	5 totally	3	4	4	3	3	2	3	3	1	4	3	3	4	3	2	3	5	5	3	4	3	2	1	3	3	3
2024/01/23 9:14:26 AM CET	Administrative sector worker	Female	Outpatient	6-10	Worker	26-30	Married/in a relationship	0-1 times per week	3	3	1 never	1 never	3	2	3	2	2	1 not at all true	1 not at all true	1 not at all true	1 not at all true	3	2	1	3	3	2	3	2	1	2	3	5	4	2	1	3	1	3	3	2
2024/01/23 9:15:10 AM CET	Technician	Female	Technical sector	11-15	worker	35-40	Single	0-1 times per week	3	2	4 often	4 often	1 not at all	1 not at all	1 not at all	2	2	2	1 not at all true	1 not at all true	1 not at all true	2	2	1	0	2	2	1	1	1	2	2	3	2	2	1	2	2	4	3	4
2024/01/23 9:15:44 AM CET	Physician	Female	internal medicine	0-5	worker	31-35	Single	2-3 times per week	4	1 not at all	1 never	1 never	4	4	4	4	3	4	3	5 totally true	3	3	3	3	3	3	3	3	3	4	3	3	5	3	3	3	3	3	4	3	4
2024/01/23 9:16:54 AM CET	Physician	Female	Internal medicine	> 20	executive	51-55	Married/in a relationship	2-3 times per week	5 totally	1 not at all	2 seldom	2 seldom	3	3	3	3	3	2	2	2	3	4	3	3	4	3	3	4	4	4	3	3	5	1	4	3	4	3	4	3	3
2024/01/23 9:18:41 AM CET	Physician	Female	Outpatient	16-20	Manager	41-45	Single	0-1 times per week	2	3	1 never	1 never	5 totally	5 totally	5 totally	3	2	3	3	4	4	3	3	2	2	2	2	2	3	3	2	3	4	2	2	5	3	2	4	2	2
2024/01/23 9:19:19 AM CET	Technician	Male	logistica	> 20	Manager	56-60	Married/in a relationship	0-1 times per week	3	1 not at all	3 sometimes	2 seldom	3	3	3	3	2	1 not at all true	1 not at all true	1 not at all true	1 not at all true	4	3	2	2	2	3	3	4	3	3	3	4	4	3	1	5	3	4	4	5
2024/01/23 9:19:30 AM CET	Ricercatore	Female	Internal medicine	6-10	Manager	31-35	Single	2-3 times per week	4	1 not at all	1 never	1 never	3	3	3	3	2	1 not at all true	1 not at all true	1 not at all true	1 not at all true	3	3	2	2	2	2	4	3	3	2	3	4	2	3	4	4	2	4	4	5
2024/01/23 9:20:33 AM CET	Administrative sector worker	Female	Administration	6-10	Worker	26-30	Married/in a relationship	2-3 times per week	5 totally	4	1 never	1 never	4	3	3	1 not at all	3	1 not at all true	5 totally true	3	4	4	3	4	3	1	2	1	2	3	1	3	5	1	3	2	4	1	3	2	3
2024/01/23 9:23:55 AM CET	Nurse	Female	Emergency medicine	6-10	Worker	31-35	Single	2-3 times per week	1 not at all	1 not at all	1 never	2 seldom	5 totally	3	1 not at all	3	1 not at all	1 not at all true	1 not at all true	3	1 not at all true	4	4	4	2	4	3	3	4	4	4	2	5	2	5	3	4	2	4	1	5
2024/01/23 9:24:03 AM CET	Administrative sector worker	Female	Internal medicine	0-5	Worker	31-35	Single	2-3 times per week	2	2	1 never	1 never	5 totally	4	4	2	3	1 not at all true	1 not at all true	4	4	3	3	3	3	3	3	3	3	3	3	4	4	3	3	4	5	2	5	2	3
2024/01/23 9:25:22 AM CET	Nurse	Female	Internal medicine	> 20	Worker	>60	Single	0-1 times per week	3	1 not at all	2 seldom	1 never	3	3	2	3	4	3	4	3	2	3	3	2	3	1	2	4	3	2	3	3	5	4	4	2	4	3	5	3	4
2024/01/23 9:26:13 AM CET	psicologa-spcioterapeuta	Female	Internal medicine	> 20	worker	46-50	Married/in a relationship	0-1 times per week	5 totally	1 not at all	1 never	1 never	4	4	4	4	4	1 not at all true	1 not at all true	1 not at all true	1 not at all true	4	4	3	3	3	4	4	4	4	4	4	5	1	4	1	4	1	5	1	3
2024/01/23 9:26:53 AM CET	Hospitality staff	Female	Hospitality	16-20	Worker	56-60	Married/in a relationship	0-1 times per week	5 totally	3	1 never	1 never	3	3	4	3	5 totally	3	3	3	3	3	2	2	3	3	3	3	2	4	3	4	5	1	3	2	4	1	5	2	3
2024/01/23 9:27:00 AM CET	Nurse	Female	Internal medicine	> 20	Worker	46-50	Married/in a relationship	0-1 times per week	5 totally	3	3 sometimes	3 sometimes	4	4	5 totally	3	5 totally	3	3	3	3	4	2	3	1	4	3	3	3	4	4	2	4	3	3	1	4	3	4	3	3
2024/01/23 9:27:20 AM CET	Physician	Female	Intensive care medicine	0-5	manager	35-40	Married/in a relationship	2-3 times per week	1 not at all	1 not at all	2 seldom	2 seldom	5 totally	5 totally	5 totally	3	1 not at all	5 totally true	2	3	1 not at all true	4	3	2	4	3	3	4	3	3	2	4	5	3	3	1	3	3	5	4	3
2024/01/23 9:28:03 AM CET	Physician	Female	Radioterapia	0-5	manager	31-35	Married/in a relationship	0-1 times per week	1 not at all	2	2 seldom	2 seldom	3	3	3	4	1 not at all	3	3	3	1 not at all true	4	3	2	3	3	3	3	2	2	2	4	5	3	2	1	3	2	4	2	3
2024/01/23 9:28:07 AM CET	Nurse	Female	Internal medicine	0-5	Worker	26-30	Married/in a relationship	0-1 times per week	2	2	3 sometimes	3 sometimes	4	4	4	4	3	3	3	3	3	3	3	3	4	2	4	3	2	4	3	4	4	2	3	2	4	1	4	3	5
2024/01/23 9:28:46 AM CET	Nurse	Female	Outpatient	16-20	manager	56-60	Single	0-1 times per week	3	1 not at all	4 often	4 often	4	3	4	4	4	3	3	3	3	4	4	3	4	4	4	4	4	4	4	4	5	4	5	1	3	3	5	3	3
2024/01/23 9:30:02 AM CET	Nurse	Male	Sala Operatoria	16-20	Worker	41-45	Married/in a relationship	0-1 times per week	3	2	2 seldom	3 sometimes	4	3	3	3	3	2	2	2	3	3	2	4	3	2	2	2	3	3	3	2	5	2	3	1	5	2	3	1	5
2024/01/23 9:30:13 AM CET	Physician	Male	malattie infettive	11-15	manager	41-45	Married/in a relationship	0-1 times per week	2	1 not at all	2 seldom	2 seldom	3	3	4	5 totally	2	5 totally true	5 totally true	5 totally true	5 totally true	4	4	4	1	3	2	4	4	4	4	3	5	4	4	5	5	1	4	1	5
2024/01/23 9:34:44 AM CET	Nurse	Female	Internal medicine	6-10	manager	31-35	Married/in a relationship	0-1 times per week	4	2	1 never	1 never	4	5 totally	4	1 not at all	3	2	1 not at all true	1 not at all true	1 not at all true	3	2	0	3	0	2	3	2	1	3	4	4	2	3	3	2	2	4	2	3
2024/01/23 9:35:01 AM CET	Nurse	Female	Internal medicine	> 20	Worker	46-50	Married/in a relationship	0-1 times per week	3	1 not at all	3 sometimes	1 never	4	4	5 totally	3	4	2	2	3	3	4	4	3	4	3	4	3	3	4	3	3	5	2	4	2	5	2	5	2	3
2024/01/23 9:35:16 AM CET	Physician	Female	Internal medicine	16-20	Executive	41-45	Married/in a relationship	2-3 times per week	3	3	3 sometimes	1 never	4	4	4	3	3	3	4	4	2	3	3	3	3	2	2	2	3	3	4	3	5	4	3	1	4	4	3	3	5
2024/01/23 9:36:32 AM CET	Physician	Male	Surgery	> 20	Executive	56-60	Single	0-1 times per week	3	3	3 sometimes	1 never	5 totally	5 totally	5 totally	2	2	5 totally true	3	4	4	4	2	1	3	2	3	4	2	4	2	1	5	2	4	1	4	5	5	5	3
2024/01/23 9:37:14 AM CET	Administrative sector worker	Female	Administration	0-5	Worker	18-25	Single	0-1 times per week	2	1 not at all	2 seldom	2 seldom	3	3	4	4	3	4	2	3	1 not at all true	4	4	3	4	4	3	4	3	4	3	1	5	1	4	4	5	1	5	2	5
2024/01/23 9:37:46 AM CET	Physician	Male	Surgery	0-5	Worker	31-35	Single	0-1 times per week	1 not at all	2	1 never	2 seldom	4	4	3	4	1 not at all	1 not at all true	2	1 not at all true	1 not at all true	4	4	3	4	3	3	2	3	3	3	3	4	4	5	2	4	2	4	2	5
2024/01/23 9:38:49 AM CET	Nurse	Female	Surgery	6-10	Worker	26-30	Married/in a relationship	0-1 times per week	3	1 not at all	3 sometimes	3 sometimes	4	4	4	3	4	3	3	3	3	3	3	3	4	3	3	3	3	3	3	3	5	3	4	3	5	2	4	4	3
2024/01/23 9:40:02 AM CET	Nurse	Male	Anaesthesia	6-10	manager	31-35	Married/in a relationship	0-1 times per week	3	5 totally	2 seldom	1 never	3	3	3	4	3	2	1 not at all true	1 not at all true	1 not at all true	3	3	4	3	2	3	3	2	3	2	2	1	2	4	4	4	3	5	2	4
2024/01/23 9:40:21 AM CET	Physician	Female	Internal medicine	0-5	Worker	31-35	Single	2-3 times per week	3	3	1 never	1 never	4	4	4	2	2	1 not at all true	4	5 totally true	4	2	2	3	3	2	3	3	3	3	3	4	5	1	3	2	2	4	4	1	2
2024/01/23 9:40:47 AM CET	Nurse	Female	Surgery	> 20	Worker	46-50	Married/in a relationship	2-3 times per week	4	1 not at all	4 often	2 seldom	2	3	3	3	3	2	3	2	3	4	4	4	4	4	4	4	0	4	3	3	4	2	3	1	5	2	5	3	4
2024/01/23 9:41:02 AM CET	Nurse	Female	polioutpatiento	> 20	manager	56-60	Single	0-1 times per week	4	1 not at all	3 sometimes	1 never	5 totally	5 totally	5 totally	5 totally	4	3	2	5 totally true	5 totally true	4	4	3	3	3	4	4	4	4	3	2	5	3	3	3	5	1	5	1	4
2024/01/23 9:41:35 AM CET	Nurse	Male	Internal medicine	6-10	executive	31-35	Single	4-5 times per week	2	1 not at all	1 never	1 never	3	3	2	3	2	4	1 not at all true	1 not at all true	1 not at all true	3	3	3	4	4	3	4	3	3	2	2	5	3	3	2	5	5	5	4	5
2024/01/23 9:42:03 AM CET	Nurse	Female	Surgery	6-10	Worker	35-40	Married/in a relationship	0-1 times per week	4	1 not at all	1 never	1 never	4	4	4	4	5 totally	2	3	2	2	4	3	2	3	4	4	3	4	4	3	4	4	4	3	4	3	3	4	3	2
2024/01/23 9:44:58 AM CET	Administrative sector worker	Female	Administration	0-5	Worker	31-35	Single	2-3 times per week	5 totally	3	2 seldom	1 never	5 totally	5 totally	5 totally	5 totally	5 totally	5 totally true	5 totally true	5 totally true	5 totally true	4	4	3	4	4	4	4	4	4	3	3	5	1	3	3	4	2	5	3	3
2024/01/23 9:45:28 AM CET	Physician	Female	Internal medicine	> 20	Executive	46-50	Married/in a relationship	2-3 times per week	2	3	2 seldom	2 seldom	5 totally	5 totally	5 totally	5 totally	3	2	4	4	4	4	4	4	4	3	3	4	4	3	4	5	5	1	4	3	3	2	4	2	2
2024/01/23 9:45:43 AM CET	Nurse	Female	Internal medicine	> 20	manager	56-60	Married/in a relationship	4-5 times per week	2	1 not at all	3 sometimes	1 never	5 totally	3	4	3	4	1 not at all true	1 not at all true	1 not at all true	1 not at all true	2	2	2	3	3	3	1	2	3	3	2	4	2	1	5	4	4	4	4	4
2024/01/23 9:45:52 AM CET	Physician	Female	Surgery	11-15	executive	35-40	Single	0-1 times per week	5 totally	1 not at all	1 never	1 never	5 totally	5 totally	5 totally	3	3	5 totally true	5 totally true	5 totally true	5 totally true	3	3	0	3	4	3	4	3	2	3	5	5	1	4	1	1	1	5	4	5
2024/01/23 9:46:27 AM CET	Nurse	Female	RAMI	> 20	manager	56-60	Married/in a relationship	0-1 times per week	1 not at all	5 totally	1 never	1 never	4	2	2	2	3	2	1 not at all true	2	1 not at all true	3	3	2	4	4	3	4	3	4	3	3	5	1	3	5	3	3	5	3	4
2024/01/23 9:47:03 AM CET	Physician	Male	Surgery	11-15	Executive	35-40	Married/in a relationship	0-1 times per week	2	2	1 never	1 never	4	4	5 totally	4	2	3	3	3	3	3	3	3	3	3	4	4	4	4	3	4	5	2	4	5	3	5	5	3	2
2024/01/23 9:47:21 AM CET	Nurse	Female	Internal medicine	0-5	Worker	18-25	Married/in a relationship	0-1 times per week	2	1 not at all	2 seldom	1 never	3	3	1 not at all	1 not at all	1 not at all	2	1 not at all true	2	1 not at all true	3	1	4	3	1	3	4	2	2	4	3	4	2	5	1	5	2	4	1	5
2024/01/23 9:47:47 AM CET	Physician	Female	Surgery	11-15	manager	41-45	Married/in a relationship	0-1 times per week	1 not at all	1 not at all	2 seldom	1 never	5 totally	5 totally	5 totally	4	1 not at all	3	1 not at all true	4	4	3	3	2	2	2	3	3	3	3	3	3	4	1	3	2	4	1	5	1	4
2024/01/23 9:49:33 AM CET	Nurse	Female	Quadro infermieristico	> 20	executive	51-55	Married/in a relationship	0-1 times per week	2	3	3 sometimes	1 never	3	3	3	4	3	3	2	1 not at all true	1 not at all true	3	4	3	3	2	3	3	3	4	3	3	5	1	3	1	3	3	4	2	5
2024/01/23 9:49:44 AM CET	Physician	Male	Otorinolaringoiatria	> 20	Manager	>60	Married/in a relationship	0-1 times per week	4	2	1 never	1 never	4	4	5 totally	5 totally	3	3	2	4	3	4	4	4	4	3	4	4	4	4	4	3	5	3	5	3	5	3	5	2	4
2024/01/23 9:50:34 AM CET	Physician	Male	Surgery	6-10	Manager	31-35	Married/in a relationship	0-1 times per week	3	4	3 sometimes	1 never	4	4	4	4	3	4	3	4	4	3	3	3	4	3	3	3	3	3	2	2	5	2	2	1	4	3	4	4	3
2024/01/23 9:53:29 AM CET	Physician	Female	Emergency medicine	6-10	manager	41-45	Married/in a relationship	0-1 times per week	2	2	2 seldom	2 seldom	5 totally	5 totally	5 totally	3	3	4	4	4	4	4	3	3	3	4	3	4	3	2	3	5	5	1	3	3	3	1	4	1	3
2024/01/23 9:54:58 AM CET	Physician	Female	Surgery e ostetricia	0-5	Worker	26-30	Married/in a relationship	2-3 times per week	4	2	1 never	1 never	4	4	4	4	2	3	3	2	2	3	4	4	4	4	3	3	3	4	4	4	5	3	4	4	5	3	4	3	4
2024/01/23 9:56:03 AM CET	Administrative sector worker	Female	Administration	11-15	Worker	35-40	Single	0-1 times per week	2	2	1 never	1 never	2	2	2	2	2	2	2	2	2	4	4	3	4	4	3	3	3	4	4	5	5	3	4	5	3	2	4	3	3
2024/01/23 9:56:30 AM CET	Nurse	Female	Internal medicine	6-10	Worker	35-40	Married/in a relationship	2-3 times per week	3	3	4 often	3 sometimes	5 totally	5 totally	5 totally	3	3	3	3	4	4	2	3	3	1	2	2	2	2	3	2	3	4	1	2	3	5	3	4	2	3
2024/01/23 9:57:13 AM CET	Hospitality staff	Female	Hospitality	6-10	Executive	26-30	Married/in a relationship	0-1 times per week	5 totally	1 not at all	1 never	1 never	3	3	3	3	4	2	2	3	1 not at all true	3	2	2	3	2	2	3	3	3	3	4	5	3	4	4	3	2	4	3	4
2024/01/23 10:03:29 AM CET	Administrative sector worker	Female	Surgery e ostetricia	> 20	Manager	>60	Married/in a relationship	2-3 times per week	3	3	3 sometimes	2 seldom	3	4	3	3	2	2	3	2	2	2	3	2	3	3	3	2	2	3	2	4	4	2	3	3	4	2	4	3	3
2024/01/23 10:05:21 AM CET	Nurse	Male	Outpatient	6-10	Worker	31-35	Married/in a relationship	0-1 times per week	3	1 not at all	2 seldom	1 never	4	4	5 totally	4	4	1 not at all true	2	3	3	3	3	2	3	3	2	3	2	2	2	2	4	2	3	2	4	2	4	4	3
2024/01/23 10:06:09 AM CET	Physician	Male	Internal medicine	11-15	Executive	41-45	Married/in a relationship	0-1 times per week	3	3	1 never	1 never	4	4	5 totally	5 totally	3	5 totally true	4	3	3	4	4	4	4	4	4	4	4	4	4	4	5	1	4	3	4	1	5	1	4
2024/01/23 10:07:38 AM CET	Physician	Female	Neurosurgery	11-15	manager	41-45	Married/in a relationship	0-1 times per week	1 not at all	2	1 never	1 never	3	2	3	3	2	3	4	5 totally true	4	3	3	2	3	3	4	4	3	4	4	5	5	2	4	4	4	3	5	1	5
2024/01/23 10:07:49 AM CET	Hospitality staff	Female	Hospitality	6-10	Executive	35-40	Married/in a relationship	2-3 times per week	5 totally	3	1 never	1 never	4	4	4	4	2	3	3	3	3	4	4	4	4	4	4	4	4	4	2	5	5	2	5	3	3	1	5	1	3
2024/01/23 10:09:04 AM CET	Physician	Male	Surgery	> 20	executive	>60	Married/in a relationship	2-3 times per week	4	1 not at all	3 sometimes	2 seldom	4	4	4	4	3	5 totally true	3	3	3	4	4	4	4	3	3	4	4	4	4	2	5	3	3	1	3	4	5	2	4
2024/01/23 10:10:45 AM CET	Nurse	Female	Emergency medicine	16-20	manager	41-45	Married/in a relationship	0-1 times per week	4	3	1 never	1 never	4	2	3	2	4	2	2	3	2	3	4	3	3	3	4	4	3	4	3	4	5	1	4	2	5	2	5	2	3
2024/01/23 10:12:00 AM CET	Nurse	Female	Emergency medicine	6-10	Worker	31-35	Married/in a relationship	0-1 times per week	2	4	2 seldom	1 never	4	4	5 totally	4	2	3	2	3	3	2	1	2	2	2	1	1	1	2	2	1	5	5	1	5	2	2	4	4	2
2024/01/23 10:12:38 AM CET	Nurse	Female	Emergency medicine	0-5	Worker	31-35	Single	0-1 times per week	2	1 not at all	1 never	1 never	4	3	3	2	2	2	2	5 totally true	3	4	3	3	4	4	3	3	4	4	4	4	5	3	3	4	5	2	3	2	3
2024/01/23 10:12:56 AM CET	Technician	Female	Technical sector	> 20	Worker	51-55	Single	0-1 times per week	3	2	2 seldom	1 never	4	4	3	4	4	4	4	3	4	4	3	3	4	3	3	3	2	3	3	3	5	3	3	3	5	3	5	4	4
2024/01/23 10:14:29 AM CET	Segretaria medica (attualmente, prima Study Nurse e Terapista riab cardiaca per un tot di 20 anni))	Female	Cardiologia	0-5	Worker	56-60	Single	4-5 times per week	4	3	2 seldom	1 never	2	3	3	3	4	3	3	1 not at all true	1 not at all true	4	4	3	4	4	3	4	4	3	4	4	5	1	5	1	5	1	5	1	5
2024/01/23 10:15:00 AM CET	Technician	Female	Technical sector	> 20	worker	>60	Married/in a relationship	2-3 times per week	3	3	1 never	1 never	4	3	4	4	4	5 totally true	4	4	4	3	3	3	4	4	3	3	3	3	3	4	4	1	1	4	5	1	5	1	2
2024/01/23 10:15:42 AM CET	Administrative sector worker	Female	Administration	> 20	Executive	>60	Married/in a relationship	0-1 times per week	3	4	1 never	1 never	4	4	3	3	2	2	3	2	2	4	2	3	2	3	2	4	2	2	2	4	4	2	3	4	4	2	3	2	2
2024/01/23 10:16:36 AM CET	Technician	Female	services	6-10	worker	31-35	Married/in a relationship	0-1 times per week	1 not at all	2	1 never	1 never	2	3	2	4	2	2	2	5 totally true	2	3	3	3	4	2	4	3	3	3	3	3	5	1	4	1	5	2	4	1	4
2024/01/23 10:19:01 AM CET	Administrative sector worker	Female	Administration	16-20	Manager	35-40	Married/in a relationship	0-1 times per week	2	5 totally	1 never	1 never	3	3	3	2	2	1 not at all true	2	1 not at all true	1 not at all true	4	3	3	3	3	4	3	3	4	3	3	5	2	3	2	3	2	5	3	5
2024/01/23 10:19:29 AM CET	Physician	Female	Anaesthesia	11-15	manager	41-45	Married/in a relationship	2-3 times per week	3	2	1 never	1 never	5 totally	5 totally	5 totally	3	5 totally	4	4	4	4	4	4	3	4	3	4	4	4	4	4	5	5	1	5	1	4	3	4	1	4
2024/01/23 10:21:49 AM CET	Nurse	Female	Emergency medicine	6-10	Worker	26-30	Single	2-3 times per week	2	1 not at all	1 never	1 never	4	4	4	3	2	2	2	3	2	3	3	3	4	3	3	3	2	2	2	3	4	3	3	2	2	3	4	4	3
2024/01/23 10:23:46 AM CET	Physician	Male	Internal medicine	16-20	Executive	41-45	Married/in a relationship	0-1 times per week	4	2	4 often	4 often	3	3	3	3	2	2	2	2	2	3	3	4	3	3	3	3	2	3	1	3	5	3	2	4	3	3	4	3	3
2024/01/23 10:24:32 AM CET	Administrative sector worker	Female	Surgery e ostetricia	11-15	Worker	46-50	Married/in a relationship	0-1 times per week	3	1 not at all	4 often	3 sometimes	4	4	4	3	3	2	2	2	2	3	3	3	4	3	4	3	2	4	3	4	5	1	3	3	5	1	5	2	3
2024/01/23 10:30:35 AM CET	Physician	Male	Surgery	0-5	Worker	26-30	Married/in a relationship	0-1 times per week	3	5 totally	1 never	1 never	4	4	4	4	3	3	4	4	4	4	4	3	4	4	4	4	4	4	4	4	4	1	4	4	3	3	4	2	3
2024/01/23 10:32:13 AM CET	Administrative sector worker	Female	Surgery e ostetricia	0-5	Worker	18-25	Married/in a relationship	0-1 times per week	3	1 not at all	1 never	1 never	2	2	2	3	3	2	2	1 not at all true	1 not at all true	3	3	2	3	2	3	3	2	3	3	3	4	3	3	3	3	4	4	4	3
2024/01/23 10:35:32 AM CET	Nurse	Female	Surgery e ostetricia	16-20	manager	35-40	Married/in a relationship	0-1 times per week	3	2	1 never	1 never	4	3	4	2	3	3	1 not at all true	2	2	3	3	3	3	2	4	3	3	4	4	4	5	2	3	2	4	2	4	2	4
2024/01/23 10:38:42 AM CET	Physician	Male	Anaesthesia	6-10	Manager	31-35	Married/in a relationship	2-3 times per week	3	1 not at all	1 never	1 never	5 totally	5 totally	5 totally	4	4	4	3	3	3	4	4	4	2	4	4	4	4	4	4	3	5	1	4	3	4	1	4	2	4
2024/01/23 10:39:37 AM CET	Nurse	Male	services	11-15	executive	31-35	Married/in a relationship	0-1 times per week	1 not at all	5 totally	2 seldom	1 never	4	4	4	4	2	2	2	4	4	4	3	4	4	1	3	3	4	4	3	3	5	1	3	1	5	1	3	1	5
2024/01/23 10:39:39 AM CET	Physician	Male	Internal medicine	> 20	Executive	46-50	Married/in a relationship	2-3 times per week	4	3	4 often	4 often	5 totally	4	5 totally	5 totally	4	4	3	4	4	4	4	4	4	4	4	3	3	4	3	2	5	1	4	1	4	2	5	2	5
2024/01/23 10:41:35 AM CET	Nurse	Male	Outpatient	6-10	Worker	31-35	Single	2-3 times per week	1 not at all	1 not at all	1 never	1 never	2	1 not at all	1 not at all	5 totally	2	3	2	3	2	3	3	3	3	3	2	0	1	2	2	4	4	4	2	3	3	4	4	4	3
2024/01/23 10:42:22 AM CET	Nurse	Male	Cure palliative	16-20	Worker	41-45	Married/in a relationship	2-3 times per week	2	4	3 sometimes	1 never	4	4	4	4	3	3	2	2	2	3	3	2	3	3	3	3	2	3	3	4	4	2	3	2	3	3	4	3	3
2024/01/23 10:46:24 AM CET	Physician	Female	Surgery	11-15	manager	41-45	Married/in a relationship	0-1 times per week	2	5 totally	4 often	1 never	4	4	4	4	3	3	4	4	4	4	3	3	3	4	3	3	3	4	3	3	5	1	3	1	5	1	5	2	5
2024/01/23 10:47:27 AM CET	Nurse	Female	Internal medicine	> 20	Worker	46-50	Married/in a relationship	0-1 times per week	3	3	2 seldom	1 never	5 totally	5 totally	5 totally	4	4	3	1 not at all true	2	2	4	3	4	4	4	4	4	4	4	3	1	4	3	3	2	5	2	4	2	4
2024/01/23 10:47:35 AM CET	Nurse	Female	Intensive care medicine	> 20	manager	56-60	Single	0-1 times per week	2	1 not at all	1 never	1 never	4	3	5 totally	5 totally	3	1 not at all true	2	1 not at all true	1 not at all true	3	3	3	3	3	3	2	3	3	3	3	5	1	4	4	4	3	4	3	4
2024/01/23 10:47:37 AM CET	Administrative sector worker	Female	Cardiologia	11-15	Worker	35-40	Married/in a relationship	0-1 times per week	3	5 totally	1 never	5 very often	4	4	4	4	4	2	2	3	3	4	3	3	4	4	4	4	4	4	4	5	5	1	5	3	5	1	5	1	3
2024/01/23 10:50:53 AM CET	Nurse	Female	Surgery	0-5	Worker	18-25	Single	2-3 times per week	1 not at all	2	2 seldom	2 seldom	3	3	3	3	3	2	1 not at all true	1 not at all true	1 not at all true	4	4	3	4	3	4	3	3	4	3	3	5	1	4	5	5	2	4	3	3
2024/01/23 10:51:16 AM CET	Nurse	Female	Internal medicine	6-10	Worker	26-30	Married/in a relationship	0-1 times per week	1 not at all	3	1 never	1 never	3	3	4	2	1 not at all	2	1 not at all true	1 not at all true	1 not at all true	2	3	3	0	2	3	3	3	3	3	3	5	2	3	4	3	2	5	2	3
2024/01/23 10:52:32 AM CET	Physician	Female	Internal medicine	11-15	manager	41-45	Married/in a relationship	0-1 times per week	1 not at all	1 not at all	1 never	1 never	2	2	2	3	2	3	3	4	3	3	3	3	2	3	3	3	3	3	4	3	4	4	2	4	4	3	4	4	4
2024/01/23 10:53:24 AM CET	levatrice	Female	Surgery e ostetricia	> 20	Worker	46-50	Single	0-1 times per week	3	1 not at all	3 sometimes	3 sometimes	3	3	4	4	3	3	2	4	4	3	3	3	3	3	3	2	2	3	3	3	4	2	3	1	4	3	4	3	4
2024/01/23 10:55:54 AM CET	Physician	Female	Internal medicine	6-10	Executive	35-40	Married/in a relationship	0-1 times per week	3	1 not at all	1 never	1 never	3	3	3	3	3	2	3	2	2	3	3	1	2	2	3	1	1	3	2	3	4	3	1	4	3	5	4	5	3
2024/01/23 10:56:26 AM CET	Nurse	Female	Internal medicine	0-5	Worker	26-30	Single	2-3 times per week	3	2	3 sometimes	2 seldom	4	3	4	2	2	3	1 not at all true	3	3	3	3	3	4	1	3	4	3	3	3	2	5	3	2	4	4	1	4	3	3
2024/01/23 10:56:59 AM CET	ass. ammnistrativa infermieristica	Female	Internal medicine	> 20	Worker	51-55	Single	0-1 times per week	4	4	2 seldom	1 never	4	4	4	4	4	2	2	2	2	4	3	3	3	3	4	2	2	2	3	5	5	4	3	2	4	2	4	2	4
2024/01/23 10:58:06 AM CET	Nurse	Male	Emergency medicine	> 20	executive	51-55	Married/in a relationship	2-3 times per week	4	2	1 never	1 never	4	4	4	3	5 totally	4	2	3	3	4	4	4	4	4	4	4	4	4	3	4	5	1	4	3	4	2	4	2	4
2024/01/23 10:59:59 AM CET	Nurse	Female	Outpatient	> 20	Worker	46-50	Single	0-1 times per week	3	1 not at all	4 often	2 seldom	5 totally	5 totally	5 totally	3	5 totally	3	3	3	4	3	3	2	4	3	3	3	3	3	3	5	5	3	4	3	3	4	4	1	2
2024/01/23 11:02:05 AM CET	Hospitality staff	Female	guardaroba	> 20	worker	46-50	Single	2-3 times per week	1 not at all	2	2 seldom	1 never	5 totally	5 totally	5 totally	5 totally	4	1 not at all true	1 not at all true	1 not at all true	2	4	3	3	3	3	4	4	3	4	4	5	5	1	5	2	5	1	5	2	5
2024/01/23 11:02:14 AM CET	Hospitality staff	Male	Hospitality	> 20	worker	56-60	Married/in a relationship	0-1 times per week	2	1 not at all	1 never	1 never	5 totally	5 totally	5 totally	4	4	2	2	4	4	4	3	4	4	4	2	3	3	1	3	4	4	5	4	1	5	3	2	3	5
2024/01/23 11:04:39 AM CET	Technician	Female	Technical sector	6-10	Worker	26-30	Single	2-3 times per week	2	1 not at all	3 sometimes	3 sometimes	2	2	2	2	2	2	3	2	1 not at all true	4	3	3	3	3	3	3	3	3	3	4	5	1	3	1	4	1	5	3	4
2024/01/23 11:06:37 AM CET	Nurse	Female	Anaesthesia	16-20	Worker	35-40	Married/in a relationship	2-3 times per week	4	3	1 never	1 never	2	1 not at all	2	3	3	3	1 not at all true	2	1 not at all true	3	3	2	3	3	3	3	3	3	3	2	5	1	4	1	4	3	4	3	3
2024/01/23 11:07:10 AM CET	Technician	Female	Farmacia	> 20	worker	51-55	Married/in a relationship	2-3 times per week	2	1 not at all	4 often	3 sometimes	4	3	3	2	3	2	2	3	2	3	2	2	3	3	3	3	2	2	3	5	5	2	4	4	4	2	5	2	3
2024/01/23 11:07:21 AM CET	Administrative sector worker	Male	Administration	16-20	Manager	56-60	Married/in a relationship	0-1 times per week	4	1 not at all	1 never	1 never	4	4	4	3	3	1 not at all true	1 not at all true	3	3	4	3	2	2	4	3	3	2	3	2	3	5	1	3	5	3	3	5	4	4
2024/01/23 11:07:53 AM CET	Physician	Male	Emergency medicine	> 20	Executive	51-55	Married/in a relationship	2-3 times per week	3	1 not at all	2 seldom	3 sometimes	4	3	3	4	5 totally	4	3	3	3	4	4	3	3	3	3	4	3	3	3	4	4	3	5	2	4	3	5	2	4
2024/01/23 11:10:54 AM CET	Physician	Male	Neurosurgery	0-5	Worker	31-35	Single	2-3 times per week	3	2	4 often	2 seldom	3	3	5 totally	3	1 not at all	4	2	4	3	2	3	2	3	2	4	3	3	3	4	5	5	2	4	2	3	5	5	3	5
2024/01/23 11:11:56 AM CET	Administrative sector worker	Female	Administration	16-20	Worker	56-60	Single	2-3 times per week	2	3	4 often	4 often	3	2	3	3	4	1 not at all true	3	2	2	3	4	3	4	3	3	2	3	4	2	2	5	4	3	1	3	2	2	3	4
2024/01/23 11:11:58 AM CET	Nurse	Male	Anaesthesia	6-10	manager	35-40	Married/in a relationship	2-3 times per week	3	2	1 never	1 never	4	4	3	3	3	4	3	3	3	3	3	1	4	1	4	3	2	3	1	4	4	1	3	4	5	2	4	4	4
2024/01/23 11:12:54 AM CET	Technician	Male	Farmacia	16-20	Executive	46-50	Single	0-1 times per week	4	3	4 often	1 never	4	3	4	4	3	4	3	4	3	4	4	3	3	4	3	3	1	4	2	5	5	1	4	1	3	3	5	2	5
2024/01/23 11:12:59 AM CET	Physician	Female	Neurosurgery	6-10	manager	31-35	Married/in a relationship	2-3 times per week	3	1 not at all	1 never	1 never	4	3	5 totally	4	3	3	5 totally true	5 totally true	4	4	4	4	4	3	4	4	4	4	4	4	5	2	4	1	3	3	4	2	3
2024/01/23 11:13:05 AM CET	Nurse	Male	Outpatient	> 20	executive	51-55	Married/in a relationship	2-3 times per week	4	2	3 sometimes	3 sometimes	5 totally	5 totally	5 totally	4	4	3	3	5 totally true	5 totally true	3	4	2	3	4	3	4	3	3	3	4	5	2	3	3	3	2	5	4	4
2024/01/23 11:15:12 AM CET	Administrative sector worker	Female	Surgery	> 20	Worker	26-30	Married/in a relationship	0-1 times per week	4	2	1 never	1 never	4	4	3	4	2	2	2	1 not at all true	1 not at all true	3	4	4	3	3	3	2	1	2	4	4	5	3	2	4	5	5	5	5	4
2024/01/23 11:15:50 AM CET	Physician	Female	Internal medicine	6-10	Manager	35-40	Married/in a relationship	0-1 times per week	4	2	3 sometimes	1 never	3	2	2	3	2	2	4	4	3	3	3	3	3	2	3	3	3	3	3	4	4	1	3	3	2	4	4	3	2
2024/01/23 11:16:29 AM CET	Nurse	Female	Intensive care medicine	> 20	manager	46-50	Married/in a relationship	4-5 times per week	2	2	1 never	1 never	4	4	5 totally	5 totally	3	4	4	2	3	2	2	1	2	3	3	2	1	2	2	2	5	1	2	4	4	2	5	3	3
2024/01/23 11:19:35 AM CET	Physician	Female	Internal medicine	0-5	Worker	26-30	Married/in a relationship	2-3 times per week	2	3	1 never	1 never	5 totally	5 totally	4	3	2	2	5 totally true	4	5 totally true	4	4	2	1	1	3	3	4	4	3	2	5	1	3	1	5	3	5	2	3
2024/01/23 11:19:42 AM CET	worker	Female	outpatiento	> 20	Worker	41-45	Married/in a relationship	0-1 times per week	1 not at all	1 not at all	2 seldom	1 never	4	4	4	4	2	2	3	3	3	3	3	3	4	3	3	4	2	3	2	5	5	3	2	2	4	1	5	3	3
2024/01/23 11:20:02 AM CET	Hospitality staff	Female	Hospitality	6-10	Worker	31-35	Single	2-3 times per week	5 totally	3	4 often	4 often	5 totally	5 totally	5 totally	5 totally	5 totally	5 totally true	4	5 totally true	5 totally true	4	4	4	4	4	4	4	4	4	4	3	4	1	4	1	3	2	4	1	4
2024/01/23 11:20:18 AM CET	Hospitality staff	Female	Hospitality	6-10	Worker	31-35	Single	2-3 times per week	5 totally	3	4 often	4 often	5 totally	5 totally	5 totally	5 totally	5 totally	5 totally true	4	5 totally true	5 totally true	4	4	4	4	4	4	4	4	4	4	3	4	1	4	1	3	2	4	1	4
2024/01/23 11:24:43 AM CET	Nurse	Female	Internal medicine	11-15	Worker	35-40	Married/in a relationship	0-1 times per week	3	4	2 seldom	1 never	4	4	4	3	4	1 not at all true	1 not at all true	1 not at all true	1 not at all true	3	3	3	3	3	3	3	3	3	3	4	5	2	3	4	4	3	4	3	3
2024/01/23 11:25:07 AM CET	Worker	Female	Services	0-5	Worker	18-25	Married/in a relationship	0-1 times per week	1 not at all	1 not at all	1 never	2 seldom	4	4	4	3	3	4	4	4	4	3	3	2	4	3	4	3	3	3	3	3	4	1	3	2	5	2	3	3	3
2024/01/23 11:25:29 AM CET	Physician	Male	Surgery	> 20	Executive	>60	Married/in a relationship	2-3 times per week	4	1 not at all	2 seldom	1 never	5 totally	5 totally	3	3	5 totally	5 totally true	5 totally true	2	4	4	4	3	4	4	4	4	4	4	4	4	5	4	5	1	4	1	5	1	5
2024/01/23 11:26:04 AM CET	Administrative sector worker	Female	Surgery	> 20	Worker	26-30	Married/in a relationship	2-3 times per week	4	5 totally	1 never	1 never	3	2	4	3	1 not at all	1 not at all true	1 not at all true	1 not at all true	1 not at all true	2	2	3	0	3	3	3	3	2	0	3	5	1	2	1	4	3	5	3	3
2024/01/23 11:30:06 AM CET	Physician	Male	Internal medicine	> 20	Executive	>60	Married/in a relationship	more than 5 times per week	4	3	2 seldom	1 never	4	4	4	5 totally	3	3	2	2	2	4	3	4	2	3	4	4	4	3	3	4	5	1	5	2	3	1	5	2	4
2024/01/23 11:30:11 AM CET	Physician	Male	Internal medicine	> 20	Executive	56-60	Married/in a relationship	4-5 times per week	4	1 not at all	1 never	1 never	4	3	3	3	4	3	3	2	2	3	3	4	2	3	4	4	4	4	3	4	5	4	5	4	3	2	5	3	5
2024/01/23 11:30:26 AM CET	Terapista	Female	Outpatient	11-15	Executive	41-45	Married/in a relationship	2-3 times per week	4	2	4 often	3 sometimes	4	3	4	2	5 totally	1 not at all true	1 not at all true	1 not at all true	1 not at all true	3	4	4	2	4	4	3	3	4	4	4	5	2	4	1	4	2	4	3	5
2024/01/23 11:30:48 AM CET	Hospitality staff	Male	Alberghiero -	> 20	Worker	>60	Married/in a relationship	more than 5 times per week	3	4	2 seldom	1 never	2	2	2	2	5 totally	1 not at all true	1 not at all true	2	1 not at all true	4	4	4	4	4	4	4	4	4	4	5	5	1	5	5	5	3	3	5	5
2024/01/23 11:31:51 AM CET	Hospitality staff	Female	Hospitality	> 20	Worker	35-40	Married/in a relationship	2-3 times per week	1 not at all	1 not at all	3 sometimes	3 sometimes	4	4	4	2	4	1 not at all true	1 not at all true	1 not at all true	2	3	3	3	4	3	4	3	3	4	4	3	5	2	3	3	5	2	5	3	5
2024/01/23 11:38:32 AM CET	Nurse	Female	Surgery	0-5	Worker	18-25	Single	2-3 times per week	4	2	1 never	1 never	4	4	4	4	3	4	4	4	4	3	3	2	3	2	3	3	3	3	3	2	4	2	3	2	5	3	5	2	3
2024/01/23 11:39:05 AM CET	Administrative sector worker	Female	Outpatient	6-10	Worker	51-55	Single	2-3 times per week	4	2	4 often	4 often	4	3	4	2	3	2	2	4	3	4	3	2	4	4	3	4	3	4	4	5	5	1	3	1	5	3	5	1	4
2024/01/23 11:47:37 AM CET	Administrative sector worker	Female	Outpatient	> 20	Worker	35-40	Single	2-3 times per week	1 not at all	1 not at all	1 never	1 never	4	4	4	4	4	1 not at all true	1 not at all true	4	3	3	4	4	4	4	4	4	4	4	3	2	5	1	3	4	4	3	5	4	5
2024/01/23 11:48:13 AM CET	Technician	Female	Technical sector	> 20	Worker	41-45	Married/in a relationship	0-1 times per week	1 not at all	2	2 seldom	1 never	3	4	3	3	3	1 not at all true	1 not at all true	3	1 not at all true	4	4	3	4	4	3	4	4	4	4	5	4	4	4	1	3	3	4	4	5
2024/01/23 11:50:08 AM CET	Nurse	Female	Surgery	> 20	Worker	41-45	Married/in a relationship	0-1 times per week	2	3	1 never	1 never	4	4	3	2	2	1 not at all true	2	1 not at all true	1 not at all true	3	3	2	2	2	3	2	3	4	3	4	5	1	3	4	4	2	5	3	1
2024/01/23 11:50:59 AM CET	Administrative sector worker	Female	Neurosurgery	11-15	Manager	35-40	Single	0-1 times per week	1 not at all	1 not at all	1 never	1 never	3	3	3	3	3	1 not at all true	1 not at all true	1 not at all true	1 not at all true	3	3	4	3	1	2	3	2	3	3	2	4	5	4	4	4	4	4	2	4
2024/01/23 11:51:46 AM CET	Physician	Male	Neurosurgery	16-20	executive	41-45	Married/in a relationship	0-1 times per week	3	5 totally	3 sometimes	3 sometimes	4	4	5 totally	5 totally	3	4	2	2	2	4	4	4	4	3	4	4	3	4	4	5	5	2	5	4	3	3	4	1	2
2024/01/23 11:53:47 AM CET	Physician	Female	Emergency medicine	> 20	executive	51-55	Married/in a relationship	4-5 times per week	3	3	5 very often	1 never	4	4	4	4	4	4	4	2	1 not at all true	4	3	2	3	3	3	3	3	3	3	3	5	1	4	1	5	3	5	2	5
2024/01/23 11:54:22 AM CET	worker	Male	Outpatient	11-15	Worker	35-40	Single	4-5 times per week	2	4	3 sometimes	1 never	3	2	2	3	2	2	2	2	2	2	2	1	2	2	1	1	1	2	2	3	5	1	2	3	3	3	4	3	4
2024/01/23 11:55:15 AM CET	Nurse	Female	Anaesthesia	11-15	manager	35-40	Married/in a relationship	0-1 times per week	3	1 not at all	2 seldom	1 never	4	4	4	4	3	3	2	2	2	4	3	3	4	3	3	4	2	3	3	4	5	1	4	4	5	2	5	1	4
2024/01/23 11:56:32 AM CET	trm	Male	Technical sector	> 20	trm	41-45	Married/in a relationship	0-1 times per week	2	3	1 never	1 never	3	2	3	3	2	4	3	1 not at all true	2	4	3	3	2	3	4	3	2	3	2	3	5	1	3	2	4	2	5	3	4
2024/01/23 11:58:44 AM CET	Administrative sector worker	Female	Neurocentro	11-15	Worker	>60	Married/in a relationship	0-1 times per week	4	1 not at all	1 never	1 never	3	3	3	3	4	1 not at all true	1 not at all true	2	3	4	4	3	3	3	2	3	3	3	3	5	5	2	4	2	3	2	4	3	4
2024/01/23 12:04:05 PM CET	Hospitality	Male	Hospitality	> 20	Worker	35-40	Single	0-1 times per week	4	1 not at all	1 never	1 never	3	4	4	4	3	1 not at all true	1 not at all true	1 not at all true	2	4	3	3	3	3	4	4	3	4	3	4	4	1	3	2	4	2	4	3	4
2024/01/23 12:05:14 PM CET	Physician	Female	Emergency medicine	0-5	Manager	41-45	Married/in a relationship	0-1 times per week	2	4	1 never	1 never	4	4	4	3	2	2	4	2	2	2	3	3	4	2	2	1	1	1	2	2	4	1	2	2	3	3	3	3	1
2024/01/23 12:06:25 PM CET	Physician	Male	Intensive care medicine	6-10	Worker	31-35	Single	2-3 times per week	2	1 not at all	1 never	1 never	4	4	5 totally	5 totally	4	4	4	4	4	4	4	4	4	4	4	4	4	4	4	3	5	2	4	2	4	1	4	2	3
2024/01/23 12:06:49 PM CET	Nurse	Female	Emergency medicine	> 20	manager	56-60	Married/in a relationship	2-3 times per week	4	3	1 never	1 never	5 totally	4	5 totally	5 totally	5 totally	1 not at all true	2	4	5 totally true	4	4	4	4	4	4	4	4	4	3	5	5	1	5	4	5	2	5	2	5
2024/01/23 12:08:29 PM CET	Administrative sector worker	Male	Internal medicine	6-10	Worker	31-35	Single	0-1 times per week	4	3	1 never	1 never	4	3	5 totally	3	5 totally	5 totally true	5 totally true	5 totally true	5 totally true	4	3	3	4	3	4	3	3	3	3	5	4	1	4	2	5	5	4	5	4
2024/01/23 12:08:50 PM CET	Technician	Female	Technical sector	6-10	Worker	31-35	Single	2-3 times per week	3	2	1 never	1 never	2	3	3	3	2	1 not at all true	1 not at all true	1 not at all true	1 not at all true	3	2	2	3	3	3	3	3	3	3	4	5	1	3	1	5	2	5	1	3
2024/01/23 12:09:33 PM CET	Nurse	Male	Surgery	0-5	Worker	18-25	Single	2-3 times per week	4	2	3 sometimes	4 often	4	2	2	3	3	3	4	3	2	4	3	3	4	3	3	3	4	4	4	4	4	2	5	2	4	1	3	2	5
2024/01/23 12:12:50 PM CET	Hospitality staff	Female	Hospitality	0-5	Worker	46-50	Married/in a relationship	0-1 times per week	4	4	3 sometimes	1 never	4	3	5 totally	4	3	4	3	4	3	4	3	3	4	4	4	4	3	4	3	5	5	1	5	3	4	1	5	4	4
2024/01/23 12:12:53 PM CET	impiegata in logistica	Female	Emergency medicine	0-5	worker	18-25	Single	4-5 times per week	5 totally	1 not at all	1 never	1 never	5 totally	5 totally	4	4	4	5 totally true	5 totally true	5 totally true	5 totally true	4	4	2	4	3	4	4	3	4	4	4	5	1	4	3	4	2	5	2	3
2024/01/23 12:13:08 PM CET	Physician	Male	Internal medicine	16-20	Executive	41-45	Married/in a relationship	0-1 times per week	1 not at all	1 not at all	1 never	1 never	3	3	3	3	1 not at all	4	1 not at all true	4	2	3	3	2	3	3	3	4	4	4	3	5	5	2	4	1	4	3	4	3	4
2024/01/23 12:15:16 PM CET	Administrative sector worker	Female	Administration	0-5	Worker	26-30	Married/in a relationship	0-1 times per week	3	2	2 seldom	1 never	3	3	3	3	3	3	2	3	3	3	2	3	3	3	2	2	2	2	2	3	4	3	2	2	3	1	4	2	3
2024/01/23 12:16:28 PM CET	Physician	Female	Internal medicine	11-15	Manager	35-40	Married/in a relationship	2-3 times per week	2	2	2 seldom	1 never	3	3	3	3	2	3	3	3	3	3	3	4	3	3	3	3	3	3	3	3	4	3	4	3	4	3	3	2	2
2024/01/23 12:21:30 PM CET	Nurse	Female	Medicina penitenziaria	> 20	Worker	46-50	Single	2-3 times per week	4	2	2 seldom	1 never	4	4	5 totally	4	4	2	2	1 not at all true	1 not at all true	4	3	2	3	3	2	3	2	3	4	5	5	4	4	3	5	3	5	1	3
2024/01/23 12:21:32 PM CET	Nurse	Female	Surgery e ostetricia	16-20	semplice nurse	51-55	Married/in a relationship	0-1 times per week	4	2	3 sometimes	1 never	3	4	4	4	3	4	4	5 totally true	2	4	4	3	4	4	3	4	4	3	4	5	5	1	4	3	5	2	4	1	3
2024/01/23 12:23:36 PM CET	Administrative sector worker	Female	Emergency medicine	0-5	Worker	18-25	Married/in a relationship	2-3 times per week	2	2	4 often	4 often	4	4	3	2	4	3	3	3	2	3	4	3	4	3	3	3	4	4	3	3	5	1	4	2	5	1	5	2	4
2024/01/23 12:24:49 PM CET	Neuropsicologo	Male	Internal medicine	0-5	Neuropsicologo	26-30	Married/in a relationship	4-5 times per week	4	2	1 never	2 seldom	5 totally	4	5 totally	4	4	2	2	5 totally true	4	4	4	4	3	4	4	2	4	4	3	1	5	2	5	3	5	3	4	1	3
2024/01/23 12:26:11 PM CET	Physician	Male	Emergency medicine	6-10	manager med worker in Ps (rotazione)	35-40	Married/in a relationship	0-1 times per week	2	4	2 seldom	1 never	4	4	3	3	2	3	4	2	2	3	3	4	3	3	3	3	3	3	3	5	4	2	3	2	3	2	4	1	3
2024/01/23 12:27:23 PM CET	Tecnico di sala operatoria	Female	Sale operatorie	0-5	Worker	26-30	Single	more than 5 times per week	1 not at all	1 not at all	2 seldom	1 never	3	3	1 not at all	1 not at all	4	1 not at all true	1 not at all true	1 not at all true	1 not at all true	3	3	3	3	4	4	4	2	4	2	5	5	1	3	1	1	3	5	5	4
2024/01/23 12:30:35 PM CET	Physician	Female	Internal medicine	0-5	Worker	26-30	Single	2-3 times per week	2	2	2 seldom	2 seldom	4	3	4	3	3	2	4	4	2	4	3	4	3	3	3	3	2	3	3	1	4	1	4	2	5	1	5	3	3
2024/01/23 12:31:34 PM CET	Nurse	Female	Outpatient	6-10	Worker	31-35	Married/in a relationship	2-3 times per week	3	1 not at all	2 seldom	1 never	2	2	3	4	4	1 not at all true	2	1 not at all true	1 not at all true	4	4	2	1	2	0	4	4	4	2	3	5	1	3	4	3	1	4	1	3
2024/01/23 12:37:25 PM CET	Nurse	Female	Intensive care medicine	16-20	Nurse	>60	Single	2-3 times per week	1 not at all	1 not at all	1 never	1 never	4	4	4	3	4	4	4	4	4	3	2	1	1	3	3	1	1	2	2	4	5	3	2	4	3	4	4	4	2
2024/01/23 12:37:43 PM CET	Physician	Male	Internal medicine	6-10	manager	31-35	Married/in a relationship	more than 5 times per week	4	1 not at all	1 never	1 never	4	4	4	4	4	3	3	3	3	3	3	3	3	3	3	3	3	3	3	2	5	1	4	4	5	2	4	2	3
2024/01/23 12:44:00 PM CET	Nurse	Female	Surgery e ostetricia	0-5	Nurse	41-45	Married/in a relationship	0-1 times per week	3	2	2 seldom	2 seldom	5 totally	5 totally	5 totally	4	5 totally	4	4	4	4	4	4	2	4	3	4	3	3	4	3	5	5	1	3	4	4	2	4	3	3
2024/01/23 12:48:01 PM CET	Nurse	Female	Internal medicine	16-20	executive	41-45	Single	0-1 times per week	2	2	4 often	5 very often	2	1 not at all	1 not at all	3	1 not at all	3	2	3	2	3	3	3	3	3	3	3	3	3	3	3	4	3	3	1	4	3	4	3	4
2024/01/23 12:48:32 PM CET	Nurse	Female	Surgery e ostetricia	> 20	manager	51-55	Married/in a relationship	0-1 times per week	3	5 totally	2 seldom	1 never	4	4	4	4	3	4	2	3	2	3	3	3	3	3	3	3	3	3	3	3	5	2	4	3	4	3	4	2	4
2024/01/23 12:50:17 PM CET	Nurse	Female	Emergency medicine	11-15	manager	35-40	Married/in a relationship	0-1 times per week	2	3	3 sometimes	2 seldom	3	3	3	2	2	3	3	2	2	4	3	4	4	4	4	4	4	4	4	3	5	1	4	1	5	2	4	2	4
2024/01/23 12:51:04 PM CET	Administrative sector worker	Female	Administration	6-10	Manager	46-50	Single	0-1 times per week	4	2	1 never	1 never	4	4	3	4	2	2	2	3	3	4	3	3	4	3	4	4	4	4	4	5	4	1	3	2	5	2	5	3	5
2024/01/23 12:51:37 PM CET	Physician	Male	Internal medicine	6-10	manager	31-35	Single	2-3 times per week	2	1 not at all	2 seldom	1 never	5 totally	4	4	4	2	1 not at all true	4	3	3	4	4	2	0	3	4	1	4	3	2	2	4	2	5	4	4	2	5	1	3
2024/01/23 12:54:23 PM CET	Esperto in prevenzione infezioni e Medicina del Personale	Male	EONOSO	> 20	EPIAS	56-60	Married/in a relationship	2-3 times per week	5 totally	5 totally	1 never	1 never	5 totally	5 totally	5 totally	5 totally	5 totally	4	3	1 not at all true	1 not at all true	3	3	0	4	4	4	4	3	4	3	2	5	1	2	1	1	2	5	4	3
2024/01/23 12:57:44 PM CET	TRM	Male	Technical sector	> 20	Executive	>60	Married/in a relationship	0-1 times per week	5 totally	1 not at all	1 never	1 never	3	3	4	4	4	3	2	2	2	3	3	3	2	3	3	3	3	3	3	4	4	3	4	1	4	2	4	2	4
2024/01/23 12:58:51 PM CET	Nurse	Male	Intensive care medicine	> 20	manager	46-50	Married/in a relationship	0-1 times per week	4	4	1 never	1 never	5 totally	5 totally	5 totally	5 totally	5 totally	5 totally true	4	3	3	4	3	4	4	3	3	4	4	4	4	3	5	2	4	5	5	3	5	2	4
2024/01/23 12:59:03 PM CET	Administrative sector worker	Female	Outpatient	16-20	Worker	31-35	Single	0-1 times per week	5 totally	3	1 never	1 never	3	3	4	4	4	1 not at all true	1 not at all true	1 not at all true	1 not at all true	4	4	3	3	4	4	2	3	3	3	5	5	3	4	4	4	3	5	3	3
2024/01/23 12:59:20 PM CET	Physician	Female	Surgery	0-5	Worker	18-25	Single	0-1 times per week	3	4	3 sometimes	2 seldom	4	4	5 totally	3	3	3	3	3	3	4	3	2	4	4	4	3	4	4	3	2	5	1	3	1	5	2	5	1	5
2024/01/23 1:02:01 PM CET	worker	Female	Angiologia	> 20	Worker	51-55	Married/in a relationship	2-3 times per week	4	4	1 never	1 never	4	5 totally	5 totally	5 totally	4	1 not at all true	1 not at all true	2	2	4	3	3	3	4	4	3	3	4	4	5	5	1	4	1	3	1	5	1	4
2024/01/23 1:02:19 PM CET	Physician	Male	Surgery e ostetricia	16-20	Executive	41-45	Married/in a relationship	4-5 times per week	2	1 not at all	1 never	1 never	4	4	5 totally	5 totally	3	3	3	5 totally true	5 totally true	4	4	4	4	4	4	4	3	3	4	4	5	2	4	1	5	2	4	3	5
2024/01/23 1:03:30 PM CET	Delegato sicurezza locale	Male	Tecnical sector	11-15	Executive	56-60	Married/in a relationship	0-1 times per week	4	1 not at all	1 never	1 never	4	4	4	4	4	4	4	3	3	3	3	3	2	3	3	3	3	3	3	3	4	2	4	4	3	2	4	3	4
2024/01/23 1:03:41 PM CET	Nurse	Female	Intensive care medicine	> 20	manager	51-55	Single	2-3 times per week	2	4	4 often	3 sometimes	4	3	5 totally	3	3	2	2	2	4	2	1	1	2	4	3	1	2	2	2	5	5	2	2	3	3	1	3	3	1
2024/01/23 1:04:41 PM CET	Technician	Male	Technical sector	> 20	Worker	56-60	Married/in a relationship	2-3 times per week	3	2	3 sometimes	1 never	2	2	4	2	2	1 not at all true	1 not at all true	2	2	3	3	3	4	3	3	3	2	3	4	5	5	1	5	3	5	2	5	2	5
2024/01/23 1:06:50 PM CET	Nurse	Female	Sala operatoria	11-15	Worker	46-50	Married/in a relationship	0-1 times per week	3	2	3 sometimes	2 seldom	3	4	4	4	1 not at all	2	1 not at all true	1 not at all true	2	2	4	1	0	3	3	2	1	4	3	3	5	3	2	2	3	2	5	3	5
2024/01/23 1:07:58 PM CET	Nurse	Female	Anaesthesia	16-20	Worker	35-40	Married/in a relationship	4-5 times per week	2	2	3 sometimes	3 sometimes	3	3	3	1 not at all	3	2	1 not at all true	2	1 not at all true	3	3	3	3	3	2	3	2	3	3	3	5	2	4	4	3	3	5	2	3
2024/01/23 1:11:23 PM CET	Administrative sector worker	Female	Surgery	> 20	Worker	41-45	Married/in a relationship	0-1 times per week	4	3	2 seldom	1 never	4	4	4	3	4	3	3	4	3	3	2	2	3	2	3	3	2	2	3	4	4	4	4	4	4	3	3	4	3
2024/01/23 1:15:57 PM CET	Physician	Male	Internal medicine	16-20	manager	46-50	Married/in a relationship	0-1 times per week	4	1 not at all	1 never	1 never	4	4	4	2	4	3	4	1 not at all true	2	4	4	2	1	2	2	3	1	1	3	5	5	3	5	2	2	4	4	4	4
2024/01/23 1:18:25 PM CET	Nurse	Female	Internal medicine	0-5	Worker	18-25	Single	0-1 times per week	4	1 not at all	1 never	1 never	3	3	4	4	2	4	4	4	4	4	4	4	4	2	4	2	2	4	3	4	5	2	4	4	5	3	5	3	5
2024/01/23 1:19:35 PM CET	Physician	Male	Emergency medicine	0-5	Worker	26-30	Married/in a relationship	0-1 times per week	4	3	1 never	1 never	4	4	5 totally	4	3	4	4	5 totally true	5 totally true	4	3	4	4	4	4	3	4	4	4	3	4	4	4	3	4	3	4	3	4
2024/01/23 1:21:30 PM CET	Nurse	Female	Surgery	> 20	Worker	46-50	Single	0-1 times per week	3	1 not at all	1 never	1 never	5 totally	5 totally	5 totally	3	1 not at all	3	3	3	4	0	4	3	3	3	2	2	3	4	4	1	5	4	3	4	4	2	4	4	4
2024/01/23 1:22:35 PM CET	Technician	Male	Technical sector	16-20	Worker	41-45	Single	2-3 times per week	3	2	1 never	1 never	4	3	5 totally	5 totally	2	3	3	1 not at all true	1 not at all true	3	2	4	4	4	3	1	3	4	1	3	5	5	5	2	5	4	4	3	3
2024/01/23 1:22:37 PM CET	Nurse	Male	Emergency medicine	11-15	executive	46-50	Married/in a relationship	2-3 times per week	3	1 not at all	2 seldom	1 never	4	3	4	4	4	5 totally true	5 totally true	4	4	4	4	4	4	4	3	4	4	3	3	4	4	3	4	3	4	1	4	3	4
2024/01/23 1:23:43 PM CET	Capo gruppo worker	Female	Hospitality	0-5	Manager	31-35	Married/in a relationship	2-3 times per week	4	4	3 sometimes	3 sometimes	4	4	4	4	4	4	4	3	4	4	4	3	4	4	4	3	3	4	3	5	5	1	4	1	4	1	5	2	3
2024/01/23 1:24:57 PM CET	Worker	Female	Serviceso sociale	6-10	Worker	26-30	Married/in a relationship	0-1 times per week	4	1 not at all	3 sometimes	2 seldom	3	4	4	4	5 totally	1 not at all true	1 not at all true	1 not at all true	2	3	3	3	4	3	4	3	2	3	3	5	5	4	3	1	3	3	4	5	2
2024/01/23 1:27:53 PM CET	Administrative sector worker	Female	Administration	11-15	Worker	31-35	Married/in a relationship	0-1 times per week	2	1 not at all	2 seldom	1 never	4	4	4	3	2	3	2	2	1 not at all true	3	2	2	3	2	3	3	2	2	1	4	4	5	3	5	4	5	4	3	5
2024/01/23 1:32:05 PM CET	Nurse	Female	Cure palliative	11-15	Worker	35-40	Married/in a relationship	2-3 times per week	1 not at all	1 not at all	1 never	1 never	3	2	3	1 not at all	2	1 not at all true	1 not at all true	1 not at all true	1 not at all true	4	4	4	4	4	4	4	4	4	3	3	5	1	5	1	5	3	5	3	5
2024/01/23 1:36:03 PM CET	Nurse	Female	Intensive care medicine	11-15	manager	35-40	Single	0-1 times per week	4	4	3 sometimes	4 often	4	3	4	4	4	4	3	3	4	3	2	2	4	3	3	3	2	4	3	4	5	4	4	2	4	2	5	1	4
2024/01/23 1:38:01 PM CET	Nurse	Female	Intensive care medicine	> 20	executive	51-55	Single	2-3 times per week	3	2	4 often	3 sometimes	4	3	4	4	3	3	3	2	4	4	3	3	4	2	3	4	3	3	3	3	5	2	4	2	4	3	5	4	3
2024/01/23 1:38:58 PM CET	psicologa	Female	internal medicine	6-10	worker	35-40	Single	0-1 times per week	3	1 not at all	2 seldom	2 seldom	4	5 totally	5 totally	3	3	2	2	3	3	4	3	2	3	3	4	4	2	4	3	4	5	3	2	4	3	2	4	3	2
2024/01/23 1:41:13 PM CET	Technician	Male	Technical sector	11-15	executive	35-40	Married/in a relationship	2-3 times per week	3	1 not at all	1 never	2 seldom	4	4	4	4	4	3	3	2	4	4	4	3	3	4	3	3	3	4	3	3	4	3	5	2	3	3	4	3	4
2024/01/23 1:44:08 PM CET	Hospitality staff	Female	Administration	> 20	Worker	56-60	Single	2-3 times per week	3	4	4 often	3 sometimes	3	3	3	4	4	4	4	1 not at all true	2	3	4	4	4	4	4	4	4	4	4	3	4	2	4	3	4	3	4	2	4
2024/01/23 1:44:40 PM CET	Nurse	Male	Internal medicine	0-5	executive	31-35	Single	4-5 times per week	4	1 not at all	2 seldom	2 seldom	4	4	4	3	3	3	2	4	4	3	3	2	4	3	3	3	2	4	3	2	5	1	4	4	4	4	5	3	4
2024/01/23 1:46:24 PM CET	Administrative sector worker	Male	Administration	> 20	Worker	46-50	Married/in a relationship	2-3 times per week	4	3	2 seldom	1 never	3	3	3	3	3	3	3	3	3	4	4	4	4	4	4	4	4	4	4	2	4	2	5	1	5	3	4	3	4
2024/01/23 1:46:30 PM CET	Hospitality staff	Male	Administration	0-5	Worker	26-30	Single	0-1 times per week	5 totally	1 not at all	1 never	1 never	5 totally	5 totally	5 totally	5 totally	5 totally	5 totally true	4	1 not at all true	5 totally true	4	4	4	4	4	4	4	4	4	4	2	5	1	5	3	5	1	5	1	5
2024/01/23 1:47:33 PM CET	Administrative sector worker	Female	Administration	16-20	Worker	46-50	Married/in a relationship	0-1 times per week	5 totally	1 not at all	5 very often	3 sometimes	3	3	4	4	4	2	2	1 not at all true	1 not at all true	4	4	4	4	3	4	3	4	4	3	1	5	4	4	1	5	3	5	4	5
2024/01/23 1:48:11 PM CET	Hospitality staff	Female	Hospitality	> 20	Executive	51-55	Married/in a relationship	0-1 times per week	3	3	3 sometimes	3 sometimes	3	4	4	4	4	4	4	4	4	4	4	3	2	4	4	4	4	4	4	5	5	3	4	2	2	1	5	1	2
2024/01/23 1:52:10 PM CET	Administrative sector worker	Male	Emergency medicine	11-15	Worker	35-40	Married/in a relationship	2-3 times per week	2	2	1 never	1 never	3	4	3	2	2	3	3	3	3	3	2	4	1	4	3	4	2	2	3	4	2	3	3	4	2	2	4	2	4
2024/01/23 1:54:46 PM CET	Administrative sector worker	Female	Technical sector	16-20	Worker	46-50	Married/in a relationship	4-5 times per week	3	4	3 sometimes	3 sometimes	3	3	4	3	4	2	1 not at all true	2	3	3	2	3	2	2	3	2	2	3	3	3	4	2	3	5	3	3	4	3	4
2024/01/23 1:55:14 PM CET	Nurse	Male	Surgery	0-5	Worker	31-35	Married/in a relationship	2-3 times per week	3	2	2 seldom	1 never	4	4	4	3	3	3	3	3	3	4	3	3	3	4	4	4	4	4	4	4	5	1	4	3	5	2	4	1	4
2024/01/23 1:58:49 PM CET	Nurse	Female	Surgery e ostetricia	0-5	Worker	26-30	Married/in a relationship	2-3 times per week	3	1 not at all	2 seldom	1 never	4	4	4	4	2	4	1 not at all true	2	1 not at all true	2	3	2	4	4	4	3	2	4	2	3	5	1	2	2	4	4	5	3	5
2024/01/23 2:05:49 PM CET	Nurse	Female	Internal medicine	0-5	manager	26-30	Single	0-1 times per week	3	1 not at all	3 sometimes	4 often	4	3	3	3	4	2	1 not at all true	1 not at all true	2	4	4	3	4	4	3	3	4	4	3	3	5	1	4	2	5	3	5	2	5
2024/01/23 2:10:08 PM CET	Worker	Female	Worker	0-5	Worker	46-50	Married/in a relationship	0-1 times per week	4	5 totally	3 sometimes	1 never	4	4	4	4	3	3	3	2	2	3	3	2	3	3	3	1	2	2	2	5	5	1	5	5	4	1	5	1	2
2024/01/23 2:10:46 PM CET	Economica domestica	Female	Dove serve nei vari piani	0-5	Worker	51-55	Married/in a relationship	0-1 times per week	2	1 not at all	1 never	1 never	5 totally	5 totally	5 totally	5 totally	3	3	3	3	4	4	2	4	2	3	3	1	1	3	3	5	5	1	4	3	5	1	5	1	5
2024/01/23 2:14:39 PM CET	Nurse	Male	Emergency medicine	> 20	manager	56-60	Married/in a relationship	0-1 times per week	1 not at all	3	2 seldom	1 never	3	3	5 totally	5 totally	1 not at all	2	1 not at all true	1 not at all true	2	4	2	2	2	2	2	2	1	2	2	3	4	4	3	3	4	1	4	3	4
2024/01/23 2:14:48 PM CET	Administrative sector worker	Female	Administration	16-20	Worker	46-50	Married/in a relationship	more than 5 times per week	5 totally	3	1 never	2 seldom	5 totally	5 totally	5 totally	5 totally	5 totally	3	2	4	5 totally true	4	3	4	3	3	3	3	3	3	0	1	3	3	3	1	5	4	3	5	5
2024/01/23 2:15:41 PM CET	Administrative sector worker	Male	Emergency medicine	0-5	Worker	18-25	Single	4-5 times per week	4	2	1 never	1 never	4	4	4	4	4	3	3	4	4	4	4	4	4	3	3	3	4	4	4	4	5	4	4	4	3	2	4	4	3
2024/01/23 2:21:33 PM CET	Nurse	Male	Surgery	6-10	Worker	35-40	Married/in a relationship	0-1 times per week	2	1 not at all	1 never	1 never	3	4	4	3	2	1 not at all true	1 not at all true	3	2	4	4	4	4	3	4	4	4	4	3	2	5	3	4	3	3	2	4	2	4
2024/01/23 2:21:53 PM CET	Administrative sector worker	Female	Internal medicine	> 20	Worker	56-60	Married/in a relationship	4-5 times per week	3	2	1 never	1 never	5 totally	5 totally	5 totally	5 totally	4	4	4	3	4	4	4	4	3	4	4	3	3	3	2	4	4	1	3	4	4	2	4	3	5
2024/01/23 2:27:18 PM CET	Physician	Male	Surgery	0-5	Worker	26-30	Single	2-3 times per week	2	1 not at all	1 never	1 never	2	2	5 totally	5 totally	1 not at all	5 totally true	5 totally true	1 not at all true	1 not at all true	4	4	4	4	4	4	4	4	4	2	5	5	4	5	1	4	5	5	3	5
2024/01/23 2:38:36 PM CET	Nurse	Female	Internal medicine / Pronto soccorso Ped / Maternità/ Surgery / Sala Parto	> 20	Worker	>60	Married/in a relationship	0-1 times per week	2	3	3 sometimes	2 seldom	4	4	4	4	3	4	3	4	3	4	3	2	3	4	2	2	3	4	2	3	5	2	4	2	3	4	4	2	4
2024/01/23 2:41:20 PM CET	Hospitality staff	Male	Hospitality	> 20	Executive	41-45	Married/in a relationship	2-3 times per week	1 not at all	2	1 never	2 seldom	3	3	4	4	4	1 not at all true	1 not at all true	3	1 not at all true	4	4	3	4	4	4	4	2	4	4	5	5	1	4	2	4	2	5	3	4
2024/01/23 2:49:37 PM CET	Physician	Male	Surgery	0-5	Worker	26-30	Married/in a relationship	2-3 times per week	1 not at all	3	2 seldom	1 never	2	2	1 not at all	3	2	1 not at all true	3	2	1 not at all true	4	4	3	4	4	4	3	2	3	2	3	5	2	4	1	4	3	5	2	5
2024/01/23 2:49:58 PM CET	Physician	Female	Anaesthesia	16-20	Manager	46-50	Married/in a relationship	0-1 times per week	3	4	1 never	1 never	4	3	4	3	2	4	2	3	3	4	2	3	4	4	4	4	4	4	2	3	5	2	5	1	4	2	4	1	5
2024/01/23 2:51:41 PM CET	Nurse	Female	Surgery	6-10	manager	31-35	Single	2-3 times per week	2	2	3 sometimes	3 sometimes	4	3	4	4	4	3	3	2	2	4	4	3	3	3	3	4	3	4	3	2	5	1	4	2	5	2	4	2	4
2024/01/23 2:54:47 PM CET	Nurse	Male	Internal medicine	0-5	Worker	18-25	Married/in a relationship	2-3 times per week	2	2	3 sometimes	3 sometimes	5 totally	5 totally	5 totally	4	3	2	2	3	1 not at all true	4	4	2	4	3	4	3	3	3	3	4	5	2	3	4	3	2	4	3	2
2024/01/23 3:03:09 PM CET	Nurse	Female	internal medicine	> 20	manager	46-50	Married/in a relationship	2-3 times per week	5 totally	5 totally	3 sometimes	3 sometimes	4	4	4	4	4	5 totally true	4	4	4	4	4	3	3	3	3	3	4	4	3	4	4	1	3	2	3	2	4	3	2
2024/01/23 3:04:39 PM CET	Nurse	Male	Anaesthesia	> 20	Worker	51-55	Single	4-5 times per week	2	3	2 seldom	2 seldom	4	4	4	4	4	4	3	4	4	4	3	4	4	3	4	3	4	4	4	4	4	2	4	4	5	3	4	4	4
2024/01/23 3:05:03 PM CET	Administrative sector worker	Male	Administration	> 20	Worker	41-45	Single	2-3 times per week	4	4	1 never	1 never	4	4	4	4	4	4	4	4	4	3	3	2	3	3	3	3	3	4	2	3	4	1	4	3	4	2	5	1	4
2024/01/23 3:11:05 PM CET	Administrative sector worker	Female	Administration	> 20	Worker	>60	Single	0-1 times per week	4	1 not at all	4 often	1 never	2	2	4	5 totally	3	1 not at all true	1 not at all true	2	1 not at all true	4	4	4	3	3	4	3	3	3	4	4	5	4	3	2	2	2	5	3	5
2024/01/23 3:13:51 PM CET	Administrative sector worker	Female	Intensive care medicine	> 20	Worker	51-55	Single	0-1 times per week	5 totally	1 not at all	3 sometimes	1 never	4	4	4	3	5 totally	3	3	4	4	3	3	2	3	3	3	4	2	3	3	4	5	2	4	2	4	3	5	1	3
2024/01/23 3:18:46 PM CET	Administrative sector worker	Male	Outpatient	0-5	Worker	26-30	Single	2-3 times per week	4	3	2 seldom	2 seldom	4	5 totally	4	4	4	3	3	4	4	3	2	1	3	3	4	3	3	3	3	3	3	2	3	2	4	3	4	3	4
2024/01/23 3:19:20 PM CET	Nurse	Female	Surgery	> 20	Worker	41-45	Married/in a relationship	4-5 times per week	3	2	1 never	1 never	4	4	4	3	4	4	3	4	4	4	4	2	3	3	3	3	3	4	4	3	4	2	3	4	3	3	5	3	4
2024/01/23 3:21:23 PM CET	infermiera/Nurse	Female	Internal medicine	16-20	manager	46-50	Married/in a relationship	2-3 times per week	3	4	2 seldom	1 never	5 totally	5 totally	5 totally	4	5 totally	3	3	3	4	4	4	4	4	4	4	3	4	4	4	1	5	1	5	1	5	2	5	1	4
2024/01/23 3:30:20 PM CET	Hospitality staff	Female	Hospitality	16-20	Manager	51-55	Married/in a relationship	0-1 times per week	5 totally	5 totally	4 often	1 never	4	3	4	3	3	3	3	3	4	4	4	4	4	2	3	3	3	3	4	3	4	2	4	1	5	2	4	1	5
2024/01/23 3:31:56 PM CET	Nurse	Female	Surgery	6-10	Worker	26-30	Married/in a relationship	2-3 times per week	2	1 not at all	2 seldom	1 never	4	4	4	3	2	3	3	3	3	4	3	2	4	3	3	2	3	3	2	4	4	1	4	4	3	2	4	2	2
2024/01/23 3:33:26 PM CET	Worker	Male	Outpatient	11-15	Worker	35-40	Married/in a relationship	2-3 times per week	2	4	1 never	4 often	3	3	4	3	2	4	4	3	4	3	3	4	3	2	3	3	3	4	3	4	5	3	4	1	5	3	4	3	5
2024/01/23 3:34:11 PM CET	worker	Female	Cardiologia	> 20	Manager	56-60	Single	0-1 times per week	3	1 not at all	2 seldom	1 never	5 totally	4	5 totally	4	4	3	3	2	3	4	3	4	3	3	3	4	3	4	2	4	5	1	4	3	5	1	4	3	5
2024/01/23 3:35:47 PM CET	Nurse	Female	Emergency medicine	6-10	manager	31-35	Single	4-5 times per week	3	1 not at all	4 often	2 seldom	5 totally	4	5 totally	3	4	3	3	2	4	3	4	3	4	4	4	3	3	4	3	3	5	1	3	1	5	2	4	4	5
2024/01/23 3:38:56 PM CET	Nurse	Male	Emergency medicine	16-20	manager	46-50	Married/in a relationship	0-1 times per week	4	1 not at all	2 seldom	3 sometimes	3	3	4	2	4	2	3	2	2	3	3	4	3	4	3	3	2	3	4	3	5	4	3	5	2	2	4	3	4
2024/01/23 3:39:24 PM CET	Administrative sector worker	Female	Surgery	> 20	Worker	46-50	Married/in a relationship	0-1 times per week	4	3	2 seldom	1 never	4	4	4	4	4	3	3	4	4	4	4	4	4	4	4	3	3	4	3	3	5	1	4	1	5	4	5	3	5
2024/01/23 3:42:02 PM CET	Nurse	Female	Internal medicine	0-5	Worker	26-30	Single	0-1 times per week	2	1 not at all	2 seldom	1 never	3	2	3	2	3	2	2	2	2	2	2	2	2	1	1	1	2	1	1	4	4	4	2	2	2	3	4	4	4
2024/01/23 3:42:30 PM CET	Physician	Male	Emergency medicine	6-10	Worker	31-35	Married/in a relationship	0-1 times per week	2	2	1 never	1 never	4	4	3	4	2	1 not at all true	3	4	4	3	2	1	1	1	2	3	2	3	3	3	4	3	4	2	3	2	3	2	2
2024/01/23 3:42:49 PM CET	Physician	Male	Intensive care medicine	> 20	Executive	56-60	Married/in a relationship	0-1 times per week	4	1 not at all	2 seldom	1 never	4	5 totally	5 totally	4	2	4	3	4	2	3	3	3	3	3	3	3	3	4	3	4	4	3	4	2	4	4	4	3	3
2024/01/23 3:45:22 PM CET	Nurse	Male	Internal medicine	> 20	manager	>60	Married/in a relationship	0-1 times per week	1 not at all	1 not at all	1 never	1 never	3	3	2	3	2	3	3	2	2	2	3	2	2	2	2	2	2	2	2	3	4	3	3	2	3	3	4	3	3
2024/01/23 3:53:54 PM CET	Nurse	Female	Internal medicine	6-10	Worker	26-30	Married/in a relationship	0-1 times per week	2	4	3 sometimes	1 never	4	3	4	3	2	2	2	1 not at all true	2	3	2	3	2	3	3	4	3	3	2	3	4	4	3	2	3	3	4	4	5
2024/01/23 3:54:21 PM CET	Administrative sector worker	Female	Surgery	0-5	Worker	46-50	Married/in a relationship	2-3 times per week	1 not at all	5 totally	2 seldom	1 never	4	4	3	4	4	2	1 not at all true	1 not at all true	3	4	4	2	4	3	3	4	4	4	4	4	5	1	4	3	4	2	5	2	3
2024/01/23 3:57:02 PM CET	Administrative sector worker	Female	Administration	> 20	Worker	56-60	Married/in a relationship	2-3 times per week	2	3	1 never	1 never	3	3	2	2	4	3	3	1 not at all true	2	3	2	1	2	3	2	3	1	2	2	5	5	1	2	3	2	1	4	2	4
2024/01/23 4:03:31 PM CET	Technician	Male	Technical sector	0-5	manager	26-30	Married/in a relationship	2-3 times per week	3	2	1 never	1 never	3	4	3	2	3	1 not at all true	2	1 not at all true	2	4	4	4	4	4	4	4	3	4	4	4	5	4	5	3	4	2	3	3	3
2024/01/23 4:05:09 PM CET	Nurse	Female	Anaesthesia	6-10	manager	31-35	Single	2-3 times per week	4	1 not at all	1 never	1 never	4	4	3	3	3	4	4	2	2	3	3	3	2	3	3	3	3	3	3	3	4	2	4	3	3	2	3	1	2
2024/01/23 4:06:59 PM CET	Nurse	Female	Outpatient	> 20	manager	56-60	Married/in a relationship	0-1 times per week	3	1 not at all	3 sometimes	1 never	5 totally	5 totally	5 totally	3	4	3	2	2	2	4	4	4	4	4	4	4	3	4	4	4	5	4	4	2	5	3	4	2	4
2024/01/23 4:08:33 PM CET	Nurse	Female	Outpatient	11-15	manager	31-35	Married/in a relationship	0-1 times per week	4	5 totally	1 never	1 never	4	4	5 totally	3	5 totally	2	3	4	4	4	2	1	2	4	2	3	3	3	2	5	5	2	3	5	4	2	4	4	2
2024/01/23 4:16:03 PM CET	Nurse	Female	Internal medicine	6-10	executive	31-35	Married/in a relationship	0-1 times per week	3	1 not at all	1 never	1 never	5 totally	5 totally	5 totally	4	3	4	3	3	4	4	3	2	3	3	4	3	4	4	4	5	5	2	4	2	4	3	5	3	4
2024/01/23 4:16:27 PM CET	Physician	Female	Emergency medicine	16-20	manager	41-45	Single	2-3 times per week	3	5 totally	5 very often	5 very often	3	3	3	2	2	3	5 totally true	1 not at all true	1 not at all true	4	4	1	4	1	4	3	0	4	1	5	5	1	2	3	3	5	5	5	5
2024/01/23 4:18:09 PM CET	Nurse	Female	Internal medicine	11-15	manager	31-35	Married/in a relationship	0-1 times per week	1 not at all	4	4 often	4 often	4	4	4	4	4	4	4	3	2	4	4	3	4	4	4	4	3	4	4	4	5	1	4	1	5	3	4	2	4
2024/01/23 4:19:20 PM CET	Worker	Female	Hospitality	0-5	Worker	35-40	Married/in a relationship	0-1 times per week	5 totally	5 totally	1 never	1 never	4	4	4	4	4	4	4	2	4	4	4	4	4	4	4	4	4	4	4	5	5	1	5	1	5	1	5	1	5
2024/01/23 4:22:28 PM CET	Administrative sector worker	Male	Administration	0-5	Manager	35-40	Married/in a relationship	0-1 times per week	4	1 not at all	1 never	1 never	3	4	3	2	4	2	1 not at all true	2	3	4	3	2	3	3	3	3	3	3	3	5	5	3	3	5	2	3	4	2	2
2024/01/23 4:23:42 PM CET	Nurse	Female	Outpatient	11-15	manager	51-55	Single	2-3 times per week	4	3	3 sometimes	1 never	5 totally	4	5 totally	5 totally	4	4	4	5 totally true	5 totally true	4	4	4	4	3	4	4	4	4	4	3	5	3	5	3	3	1	5	2	5
2024/01/23 4:42:41 PM CET	Technician	Male	Tecnical sector	6-10	Worker	56-60	Single	0-1 times per week	5 totally	2	1 never	1 never	4	4	4	4	4	4	3	3	4	4	3	3	4	4	3	3	1	3	3	3	4	1	4	3	4	2	4	1	3
2024/01/23 4:44:18 PM CET	Nurse	Female	Anaesthesia	> 20	manager	46-50	Married/in a relationship	2-3 times per week	3	3	1 never	1 never	4	3	4	3	3	3	2	2	2	4	3	0	3	3	2	2	2	3	3	3	4	1	3	2	4	1	4	3	5
2024/01/23 4:44:22 PM CET	Nurse	Female	Internal medicine	6-10	Worker	31-35	Single	2-3 times per week	3	3	1 never	2 seldom	4	4	5 totally	5 totally	2	2	2	2	2	3	4	4	4	3	4	4	4	4	3	3	5	1	4	4	3	1	4	3	5
2024/01/23 4:56:00 PM CET	Hospitality staff	Female	Hospitality	> 20	Worker	>60	Married/in a relationship	0-1 times per week	2	2	1 never	1 never	3	3	4	3	3	2	4	1 not at all true	1 not at all true	3	3	1	1	4	4	3	2	4	4	5	5	1	3	5	5	3	5	5	3
2024/01/23 5:03:13 PM CET	Physician	Female	Anaesthesia	6-10	manager	41-45	Married/in a relationship	0-1 times per week	1 not at all	3	1 never	1 never	5 totally	5 totally	5 totally	5 totally	2	3	4	2	2	4	3	3	3	3	3	3	2	3	2	3	4	2	2	2	4	2	4	3	4
2024/01/23 5:04:39 PM CET	Technician	Male	Tecnical sector	6-10	Worker	35-40	Married/in a relationship	2-3 times per week	3	2	1 never	1 never	3	3	3	3	4	4	4	3	4	3	3	2	3	3	2	3	2	2	3	3	4	1	3	2	5	3	4	3	4
2024/01/23 5:05:09 PM CET	Physician	Male	Surgery	> 20	Executive	51-55	Married/in a relationship	0-1 times per week	2	3	1 never	1 never	4	4	4	5 totally	4	3	4	2	2	4	4	4	4	4	4	4	4	4	4	5	5	1	5	3	4	3	5	2	4
2024/01/23 5:08:14 PM CET	Physician	Male	Intensive care medicine	> 20	Executive	56-60	Married/in a relationship	2-3 times per week	3	1 not at all	3 sometimes	3 sometimes	5 totally	5 totally	5 totally	3	3	4	4	4	3	3	3	3	3	3	3	3	3	3	3	3	4	1	4	1	4	2	4	2	3
2024/01/23 5:11:58 PM CET	Nurse	Female	Emergency medicine	0-5	Worker	18-25	Married/in a relationship	0-1 times per week	1 not at all	4	2 seldom	2 seldom	3	3	4	4	2	3	3	1 not at all true	1 not at all true	4	3	3	4	4	3	4	3	3	4	4	5	2	3	1	5	1	5	3	3
2024/01/23 5:14:02 PM CET	Nurse	Male	Emergency medicine	6-10	manager	35-40	Married/in a relationship	2-3 times per week	2	1 not at all	1 never	1 never	5 totally	5 totally	5 totally	5 totally	2	4	1 not at all true	1 not at all true	1 not at all true	3	3	4	4	4	4	4	4	4	3	4	5	1	5	2	5	2	5	4	5
2024/01/23 5:14:30 PM CET	Physician	Male	Anaesthesia	0-5	Worker	31-35	Single	2-3 times per week	4	1 not at all	1 never	2 seldom	5 totally	4	5 totally	4	3	5 totally true	4	5 totally true	5 totally true	3	3	3	4	3	4	3	3	3	3	5	5	3	4	4	2	1	5	1	4
2024/01/23 5:16:22 PM CET	Nurse	Female	Internal medicine	> 20	Worker	56-60	Married/in a relationship	2-3 times per week	4	4	2 seldom	1 never	4	4	4	4	5 totally	3	4	4	4	4	4	3	4	4	4	4	3	4	4	3	4	1	4	2	5	3	4	2	4
2024/01/23 5:22:32 PM CET	Nurse	Female	Internal medicine	16-20	Worker	41-45	Married/in a relationship	0-1 times per week	4	1 not at all	3 sometimes	2 seldom	3	3	4	3	4	5 totally true	2	4	2	4	4	4	4	4	4	4	4	4	4	2	4	5	5	1	5	4	4	3	5
2024/01/23 5:29:00 PM CET	Technician	Female	Outpatient	11-15	Worker	31-35	Single	0-1 times per week	3	3	1 never	1 never	3	2	2	1 not at all	3	1 not at all true	1 not at all true	1 not at all true	1 not at all true	3	3	2	3	2	4	3	2	3	3	5	5	1	3	5	5	1	4	3	2
2024/01/23 5:29:05 PM CET	Technician	Female	Outpatient	11-15	Worker	31-35	Single	0-1 times per week	3	3	1 never	1 never	3	2	2	1 not at all	3	1 not at all true	1 not at all true	1 not at all true	1 not at all true	3	3	2	3	2	4	3	2	3	3	5	5	1	3	5	5	1	4	3	2
2024/01/23 5:29:05 PM CET	Physician	Female	Intensive care medicine	11-15	manager	35-40	Married/in a relationship	0-1 times per week	2	1 not at all	1 never	1 never	3	4	3	4	3	4	1 not at all true	2	1 not at all true	4	3	3	4	4	3	4	3	4	3	3	5	1	4	3	4	4	4	2	2
2024/01/23 5:30:15 PM CET	Nurse	Female	Surgery e ostetricia	> 20	manager	51-55	Married/in a relationship	2-3 times per week	1 not at all	3	1 never	1 never	3	3	3	3	2	2	2	2	2	2	2	2	3	4	4	1	1	3	2	5	5	1	2	4	4	1	4	5	5
2024/01/23 5:32:09 PM CET	Nurse	Female	Internal medicine	6-10	Worker	26-30	Married/in a relationship	2-3 times per week	3	1 not at all	3 sometimes	4 often	3	3	4	3	2	4	3	2	3	4	3	2	3	3	3	3	2	3	4	4	5	3	3	2	2	2	3	3	4
2024/01/23 5:33:44 PM CET	Nurse	Female	Intensive care medicine	16-20	manager	41-45	Married/in a relationship	2-3 times per week	3	4	4 often	4 often	3	3	3	4	3	3	1 not at all true	1 not at all true	2	4	3	3	4	3	3	2	3	3	4	2	5	1	3	3	5	1	4	1	4
2024/01/23 5:37:22 PM CET	Nurse	Male	Emergency medicine	11-15	Worker	35-40	Married/in a relationship	0-1 times per week	2	2	1 never	1 never	3	3	3	4	3	3	3	3	4	4	4	4	4	4	4	4	4	3	4	3	5	1	5	3	5	1	4	1	5
2024/01/23 5:40:50 PM CET	Nurse	Female	Rami	11-15	Worker	41-45	Married/in a relationship	2-3 times per week	3	2	1 never	2 seldom	4	4	5 totally	4	5 totally	5 totally true	4	4	3	4	4	3	4	3	4	3	4	4	3	3	5	3	4	3	5	5	5	3	5
2024/01/23 5:53:12 PM CET	Physician	Male	Surgery e ostetricia	6-10	manager	35-40	Married/in a relationship	0-1 times per week	3	1 not at all	1 never	1 never	5 totally	4	4	3	3	4	3	3	4	3	3	3	3	3	3	3	3	3	3	5	5	4	5	5	4	1	4	4	4
2024/01/23 5:57:17 PM CET	Administrative sector worker	Male	Administration	0-5	Executive	41-45	Married/in a relationship	0-1 times per week	4	1 not at all	2 seldom	3 sometimes	4	4	3	5 totally	2	4	4	3	3	3	4	4	4	3	4	4	4	4	4	3	5	1	5	3	4	2	3	1	5
2024/01/23 6:15:54 PM CET	Hospitality staff	Male	Hospitality	> 20	Worker	56-60	Married/in a relationship	2-3 times per week	5 totally	3	1 never	1 never	3	3	5 totally	3	5 totally	1 not at all true	1 not at all true	3	1 not at all true	4	4	4	4	4	4	4	4	4	4	5	5	1	5	4	5	1	5	1	4
2024/01/23 6:17:33 PM CET	Nurse	Female	Intensive care medicine	> 20	manager	46-50	Married/in a relationship	0-1 times per week	1 not at all	2	1 never	1 never	4	4	4	3	3	3	2	3	3	4	3	3	3	3	2	3	2	3	3	4	4	1	3	4	4	1	3	3	3
2024/01/23 6:25:36 PM CET	Nurse	Female	Surgery e ostetricia	> 20	Worker	51-55	Married/in a relationship	0-1 times per week	2	5 totally	3 sometimes	3 sometimes	4	4	4	3	3	3	3	2	2	4	4	4	4	3	3	3	4	4	4	1	4	2	4	3	5	2	3	2	5
2024/01/23 6:25:53 PM CET	Nurse	Male	Emergency medicine	> 20	Worker	51-55	Married/in a relationship	4-5 times per week	4	5 totally	1 never	1 never	5 totally	5 totally	5 totally	4	4	5 totally true	4	3	3	4	4	4	3	4	4	4	4	4	4	3	5	1	4	3	5	2	5	2	5
2024/01/23 6:28:18 PM CET	Nurse	Female	Outpatient	16-20	manager	35-40	Married/in a relationship	0-1 times per week	3	4	1 never	1 never	5 totally	4	4	4	4	3	3	4	4	4	3	4	3	3	3	4	3	4	4	3	5	3	4	4	5	2	5	3	4
2024/01/23 6:54:49 PM CET	Physician	Male	Anaesthesia	> 20	manager	56-60	Married/in a relationship	2-3 times per week	3	2	1 never	1 never	4	4	4	3	3	3	1 not at all true	1 not at all true	1 not at all true	3	3	2	3	3	1	3	3	3	3	3	4	3	4	2	4	3	4	2	3
2024/01/23 7:21:17 PM CET	Worker	Female	Fisioterapia in degenza e outpatiento	16-20	Worker	41-45	Single	0-1 times per week	5 totally	1 not at all	1 never	1 never	5 totally	4	5 totally	4	5 totally	2	2	3	3	2	4	4	2	2	3	3	3	3	4	3	4	2	5	2	3	4	4	2	4
2024/01/23 7:33:28 PM CET	Nurse	Male	Neurosurgery	> 20	Worker	51-55	Married/in a relationship	2-3 times per week	4	3	2 seldom	1 never	3	3	3	2	3	2	2	2	2	3	3	3	3	2	2	3	2	1	2	3	2	1	3	1	3	1	4	1	3
2024/01/23 7:33:36 PM CET	Physician	Male	Otorinolaringoiatria	> 20	worker	26-30	Single	0-1 times per week	3	1 not at all	1 never	1 never	5 totally	5 totally	5 totally	4	2	3	4	4	4	2	2	0	3	1	1	2	3	2	4	4	4	1	1	1	2	1	4	2	2
2024/01/23 7:35:49 PM CET	Technician	Female	Services	> 20	Executive	56-60	Married/in a relationship	0-1 times per week	2	1 not at all	5 very often	3 sometimes	4	4	4	4	3	4	4	4	4	4	3	4	4	4	4	4	4	4	4	4	5	4	5	1	3	1	5	1	5
2024/01/23 7:35:51 PM CET	Physician	Male	Emergency medicine	> 20	executive	51-55	Married/in a relationship	0-1 times per week	3	1 not at all	1 never	1 never	4	4	5 totally	4	5 totally	2	4	2	2	4	4	3	4	4	3	4	4	4	1	3	4	2	4	1	5	3	4	2	4
2024/01/23 7:38:44 PM CET	Hospitality staff	Female	Hospitality	6-10	Worker	51-55	Married/in a relationship	0-1 times per week	1 not at all	1 not at all	3 sometimes	3 sometimes	3	3	3	3	1 not at all	1 not at all true	1 not at all true	1 not at all true	1 not at all true	3	2	2	3	3	3	3	0	0	0	1	1	1	1	1	1	1	1	1	1
2024/01/23 7:47:23 PM CET	Worker	Female	Worker	16-20	Worker	51-55	Married/in a relationship	2-3 times per week	3	4	1 never	1 never	2	4	4	3	3	2	2	4	3	2	3	4	3	1	3	3	3	4	2	4	5	1	5	2	5	1	5	1	5
2024/01/23 8:07:29 PM CET	Tecnico di sala operatoria	Female	Anaesthesia	6-10	manager	31-35	Married/in a relationship	0-1 times per week	1 not at all	2	3 sometimes	2 seldom	3	3	3	3	3	2	1 not at all true	1 not at all true	1 not at all true	4	3	3	4	4	4	4	4	4	3	3	4	2	3	2	4	2	4	3	4
2024/01/23 8:28:46 PM CET	Physician	Female	Emergency medicine	0-5	Worker	26-30	Single	2-3 times per week	3	2	3 sometimes	3 sometimes	5 totally	5 totally	4	3	3	2	2	2	2	3	3	1	4	3	4	2	4	4	3	3	5	2	3	2	4	2	4	2	2
2024/01/23 8:42:27 PM CET	Physician	Female	Internal medicine	> 20	manager	>60	Married/in a relationship	0-1 times per week	3	3	1 never	1 never	5 totally	5 totally	5 totally	3	5 totally	3	3	3	3	4	4	3	4	4	4	4	3	4	3	4	5	1	4	4	4	4	5	3	4
2024/01/23 8:56:50 PM CET	Nurse	Female	Surgery	6-10	Worker	26-30	Married/in a relationship	0-1 times per week	2	1 not at all	3 sometimes	3 sometimes	4	3	3	3	3	3	4	4	4	4	3	1	3	3	4	4	4	4	4	3	5	3	3	3	5	3	4	4	4
2024/01/23 9:07:48 PM CET	Physician	Male	Emergency medicine	6-10	manager	35-40	Married/in a relationship	0-1 times per week	2	2	3 sometimes	3 sometimes	4	4	4	3	4	3	3	4	2	2	2	2	3	2	2	2	1	4	3	2	4	3	3	1	4	4	4	3	5
2024/01/23 9:23:39 PM CET	Nurse	Female	Emergency medicine	> 20	manager	56-60	Married/in a relationship	4-5 times per week	4	3	5 very often	5 very often	4	4	4	4	5 totally	5 totally true	4	3	3	4	4	3	4	4	4	4	4	4	3	3	4	1	4	1	5	2	5	4	5
2024/01/23 9:31:18 PM CET	Nurse	Female	Emergency medicine	0-5	Worker	26-30	Married/in a relationship	0-1 times per week	4	4	1 never	1 never	4	4	4	4	3	4	4	5 totally true	4	3	3	0	4	2	3	4	3	2	2	3	5	1	3	5	3	4	4	4	2
2024/01/23 9:37:44 PM CET	Nurse	Female	Cardiologia	6-10	Worker	35-40	Married/in a relationship	0-1 times per week	3	1 not at all	1 never	1 never	4	4	4	4	4	1 not at all true	1 not at all true	3	4	4	1	4	4	0	4	3	4	4	2	1	5	1	4	2	5	1	5	1	5
2024/01/23 9:50:48 PM CET	Physician	Male	Outpatient	0-5	Worker	31-35	Single	2-3 times per week	3	3	4 often	1 never	5 totally	4	4	5 totally	3	4	3	3	2	4	3	3	3	3	4	4	3	3	3	2	5	2	4	1	5	2	4	2	3
2024/01/23 9:59:37 PM CET	Hospitality staff	Female	Hospitality	6-10	Worker	41-45	Married/in a relationship	0-1 times per week	4	3	1 never	1 never	2	2	3	2	1 not at all	3	3	2	2	2	2	2	2	2	2	1	1	2	2	2	5	1	3	3	4	2	4	2	2
2024/01/23 10:04:48 PM CET	Nurse	Female	Intensive care medicine	11-15	manager	35-40	Married/in a relationship	2-3 times per week	3	1 not at all	4 often	4 often	3	3	2	1 not at all	2	4	3	2	3	3	3	3	4	4	4	3	3	4	3	5	5	1	4	2	2	1	5	2	3
2024/01/23 10:04:52 PM CET	Nurse	Female	tutti reparti degenza	11-15	Worker	31-35	Married/in a relationship	0-1 times per week	1 not at all	2	1 never	1 never	3	3	3	3	3	2	2	1 not at all true	1 not at all true	4	3	2	4	4	3	4	3	3	3	4	5	1	3	5	5	1	4	5	5
2024/01/23 10:35:10 PM CET	Physician	Male	Emergency medicine	0-5	Worker	26-30	Married/in a relationship	2-3 times per week	2	1 not at all	1 never	1 never	4	3	4	3	2	4	4	4	1 not at all true	2	2	0	4	3	4	4	1	3	1	4	5	2	1	1	4	5	5	5	4
2024/01/23 10:57:37 PM CET	Nurse	Female	Outpatient	11-15	manager	35-40	Married/in a relationship	0-1 times per week	2	4	2 seldom	1 never	3	4	4	3	3	3	3	4	3	3	3	2	3	3	4	3	3	3	2	3	4	2	3	3	4	4	4	3	3
2024/01/23 11:31:46 PM CET	Nurse	Female	Surgery	0-5	Worker	31-35	Single	0-1 times per week	1 not at all	3	2 seldom	1 never	4	3	4	2	2	3	3	3	4	2	2	1	3	3	3	2	2	4	3	3	5	3	2	2	3	3	4	3	2
2024/01/23 11:55:39 PM CET	Physician	Female	Emergency medicine	0-5	Worker	35-40	Single	2-3 times per week	3	4	3 sometimes	2 seldom	4	4	4	4	4	4	4	4	3	3	4	4	3	4	3	4	3	4	4	5	5	1	4	1	4	1	5	3	3
2024/01/24 12:14:42 AM CET	Nurse	Female	Intensive care medicine	> 20	manager	56-60	Married/in a relationship	0-1 times per week	2	1 not at all	4 often	3 sometimes	3	2	4	4	2	3	3	2	2	4	3	2	3	3	4	3	3	4	3	5	5	1	3	1	4	1	5	2	3
2024/01/24 12:22:58 AM CET	Nurse	Female	Surgery e ostetricia	0-5	Worker	26-30	Married/in a relationship	0-1 times per week	3	5 totally	1 never	1 never	3	3	4	4	4	2	1 not at all true	1 not at all true	1 not at all true	3	3	0	3	3	3	3	2	3	4	5	4	2	4	3	3	4	4	1	2
2024/01/24 12:32:49 AM CET	Nurse	Female	Intensive care medicine	6-10	manager	31-35	Married/in a relationship	2-3 times per week	2	2	3 sometimes	3 sometimes	4	4	4	4	2	3	4	3	3	3	3	2	2	2	3	2	3	4	3	4	4	2	3	2	3	1	4	1	4
2024/01/24 1:38:50 AM CET	Nurse	Female	Emergency medicine	16-20	manager	41-45	Married/in a relationship	2-3 times per week	2	2	1 never	1 never	3	4	4	3	3	4	2	4	3	4	4	3	3	2	3	3	3	4	4	5	5	1	4	2	4	3	5	1	3
2024/01/24 1:51:21 AM CET	Nurse	Female	internal medicine	0-5	Worker	26-30	Single	0-1 times per week	3	3	2 seldom	1 never	4	4	4	4	3	3	3	2	3	4	2	1	3	3	2	3	2	3	2	3	4	3	3	2	4	2	4	2	3
2024/01/24 2:12:10 AM CET	Nurse	Female	internal medicine	16-20	manager	46-50	Married/in a relationship	2-3 times per week	4	1 not at all	2 seldom	1 never	4	4	4	4	3	2	2	2	2	3	3	3	4	3	3	3	3	3	3	4	4	2	4	2	3	1	4	1	3
2024/01/24 2:37:55 AM CET	Nurse	Female	Internal medicine	0-5	Worker	26-30	Married/in a relationship	2-3 times per week	2	1 not at all	4 often	1 never	4	5 totally	5 totally	3	2	1 not at all true	1 not at all true	3	4	3	2	2	4	2	3	3	0	3	4	2	5	1	3	5	4	1	5	4	4
2024/01/24 4:45:42 AM CET	Physician	Male	Surgery e ostetricia	0-5	Worker	26-30	Married/in a relationship	2-3 times per week	3	2	1 never	1 never	4	3	4	4	2	3	1 not at all true	2	3	4	3	3	3	1	4	4	1	4	4	4	5	2	5	4	2	2	4	3	3
2024/01/24 4:57:41 AM CET	Physician	Female	Emergency medicine	0-5	worker	31-35	Single	4-5 times per week	2	2	2 seldom	1 never	5 totally	5 totally	5 totally	5 totally	2	2	4	5 totally true	5 totally true	3	3	2	4	3	4	4	1	4	3	5	5	1	2	1	1	1	5	5	3
2024/01/24 5:35:25 AM CET	Nurse	Female	Internal medicine	6-10	Worker	31-35	Single	0-1 times per week	1 not at all	4	1 never	1 never	4	4	4	4	1 not at all	2	2	3	3	2	2	2	2	3	2	3	2	2	3	5	5	3	3	3	2	2	5	3	2
2024/01/24 5:59:33 AM CET	Physician	Female	Surgery	6-10	manager	31-35	Single	2-3 times per week	1 not at all	1 not at all	3 sometimes	2 seldom	4	5 totally	4	4	1 not at all	4	5 totally true	1 not at all true	4	4	4	3	4	4	4	4	3	4	3	3	5	4	3	5	3	3	5	3	5
2024/01/24 6:20:55 AM CET	Nurse	Female	Surgery e ostetricia	> 20	manager	46-50	Married/in a relationship	2-3 times per week	2	2	3 sometimes	2 seldom	4	4	4	2	3	3	2	2	1 not at all true	2	1	2	1	2	2	2	1	2	2	5	5	2	3	4	3	2	5	3	2
2024/01/24 7:23:32 AM CET	Nurse	Female	Internal medicine	0-5	Worker	18-25	Single	2-3 times per week	3	4	2 seldom	1 never	3	3	3	3	2	5 totally true	3	5 totally true	5 totally true	3	2	1	3	3	3	3	1	3	2	3	4	4	3	2	5	2	4	3	4
2024/01/24 7:29:10 AM CET	Nurse	Female	Internal medicine	6-10	manager	26-30	Married/in a relationship	0-1 times per week	1 not at all	1 not at all	1 never	1 never	4	4	4	3	3	3	3	3	3	4	4	4	3	3	4	4	2	3	3	3	5	3	4	3	3	2	5	3	4
2024/01/24 7:38:34 AM CET	Technician	Female	Services	11-15	Worker	46-50	Married/in a relationship	0-1 times per week	3	5 totally	1 never	1 never	5 totally	3	4	3	5 totally	2	3	2	2	3	3	4	3	4	4	3	3	2	2	3	4	1	3	4	5	3	5	3	3
2024/01/24 7:42:05 AM CET	Physician	Male	Services	> 20	manager	56-60	Married/in a relationship	0-1 times per week	2	4	1 never	1 never	4	4	4	3	2	3	5 totally true	3	3	3	4	2	3	3	3	2	3	3	3	4	5	3	4	2	3	2	4	3	3
2024/01/24 7:54:00 AM CET	Physician	Female	Surgery e ostetricia	6-10	Worker	35-40	Married/in a relationship	0-1 times per week	2	3	2 seldom	1 never	3	3	3	1 not at all	4	2	1 not at all true	4	2	3	2	2	3	3	1	3	2	1	3	4	4	3	3	3	3	1	4	2	3
2024/01/24 7:55:45 AM CET	Nurse	Female	internal medicine	> 20	manager	46-50	Married/in a relationship	0-1 times per week	4	2	4 often	4 often	4	4	4	4	3	2	3	2	3	4	3	2	4	4	4	3	4	4	4	5	5	1	4	1	3	2	5	1	2
2024/01/24 8:00:24 AM CET	Administrative sector worker	Female	Outpatient	6-10	Worker	31-35	Single	2-3 times per week	5 totally	1 not at all	2 seldom	1 never	4	3	4	2	4	1 not at all true	4	2	2	4	4	3	4	2	3	4	4	4	4	5	5	3	5	2	3	2	5	3	2
2024/01/24 8:14:02 AM CET	Hospitality staff	Female	Jolly	0-5	Worker	51-55	Single	0-1 times per week	2	1 not at all	1 never	1 never	2	2	1 not at all	2	2	3	2	2	1 not at all true	4	3	4	3	2	2	2	3	3	3	4	5	2	2	4	5	2	4	1	5
2024/01/24 8:15:42 AM CET	Nurse	Female	Administration	> 20	executive	41-45	Married/in a relationship	0-1 times per week	5 totally	1 not at all	3 sometimes	1 never	4	3	4	4	3	3	4	4	4	4	4	4	4	4	3	3	2	4	4	3	5	1	4	3	5	3	4	2	5
2024/01/24 8:22:32 AM CET	Nurse	Male	Emergency medicine	> 20	manager	46-50	Married/in a relationship	2-3 times per week	4	1 not at all	1 never	1 never	5 totally	5 totally	5 totally	4	4	4	3	4	3	4	3	3	3	3	3	4	3	3	3	4	5	1	4	5	4	1	5	1	3
2024/01/24 8:26:40 AM CET	Nurse	Female	Emergency medicine	> 20	manager	51-55	Married/in a relationship	2-3 times per week	3	4	2 seldom	2 seldom	4	4	4	4	4	3	1 not at all true	2	1 not at all true	3	3	3	3	3	3	3	4	4	2	4	4	1	4	1	3	2	4	3	3
2024/01/24 8:29:13 AM CET	Nurse	Male	Anaesthesia	16-20	manager	41-45	Married/in a relationship	2-3 times per week	3	4	1 never	1 never	4	4	5 totally	5 totally	3	2	2	3	3	4	3	3	4	4	4	4	4	4	4	2	5	1	4	2	5	1	5	1	5
2024/01/24 8:32:53 AM CET	Technician	Male	Technical sector	> 20	Worker	>60	Married/in a relationship	0-1 times per week	4	3	1 never	1 never	5 totally	4	4	5 totally	4	3	3	4	2	3	3	3	2	3	2	3	3	4	3	5	5	3	4	3	5	2	4	2	3
2024/01/24 8:38:08 AM CET	Physician	Female	Anaesthesia	0-5	Worker	26-30	Single	4-5 times per week	3	2	1 never	1 never	3	3	3	2	2	3	2	1 not at all true	1 not at all true	4	4	4	4	4	3	4	3	4	3	2	4	1	4	1	5	3	4	3	4
2024/01/24 8:46:55 AM CET	Technician	Male	Tecnical sector	6-10	Worker	46-50	Married/in a relationship	0-1 times per week	4	5 totally	2 seldom	1 never	4	4	4	4	4	2	2	3	3	3	3	2	3	2	3	3	2	3	3	4	5	3	4	3	3	4	4	2	3
2024/01/24 8:49:14 AM CET	Physician	Female	Surgery	0-5	Worker	26-30	Single	0-1 times per week	2	1 not at all	1 never	1 never	4	4	4	4	2	5 totally true	5 totally true	4	3	4	4	3	4	4	4	3	3	4	3	3	4	2	3	3	4	3	5	5	2
2024/01/24 8:49:56 AM CET	Administrative sector worker	Female	internal medicine	0-5	Worker	46-50	Single	0-1 times per week	5 totally	3	1 never	1 never	5 totally	5 totally	5 totally	5 totally	5 totally	3	3	5 totally true	3	4	4	4	4	3	3	3	4	4	3	3	5	1	5	2	4	1	4	1	5
2024/01/24 8:50:10 AM CET	Nurse	Female	Emergency medicine	> 20	Worker	51-55	Single	0-1 times per week	1 not at all	2	1 never	1 never	3	3	3	3	1 not at all	3	2	2	2	2	3	2	1	2	2	2	3	2	3	5	5	3	3	5	1	2	5	4	2
2024/01/24 9:08:03 AM CET	Administrative sector worker	Female	Administration	> 20	Worker	56-60	Married/in a relationship	0-1 times per week	4	3	1 never	1 never	4	4	4	4	4	4	3	4	4	4	4	3	3	4	4	4	4	4	4	5	5	5	5	2	5	1	5	1	5
2024/01/24 9:12:17 AM CET	Physician	Male	Services	0-5	worker	31-35	Single	0-1 times per week	2	1 not at all	3 sometimes	2 seldom	5 totally	4	4	3	3	5 totally true	5 totally true	4	4	4	3	4	2	3	3	4	3	3	3	4	5	2	5	2	3	2	5	1	3
2024/01/24 9:16:31 AM CET	worker	Female	Cardiologia	> 20	Worker	46-50	Single	0-1 times per week	5 totally	2	2 seldom	2 seldom	4	4	4	4	4	3	3	3	3	3	4	4	4	4	4	4	4	4	4	4	5	1	4	5	5	2	3	1	5
2024/01/24 9:21:48 AM CET	Technician	Female	Technical sector	11-15	Executive	35-40	Married/in a relationship	0-1 times per week	3	2	2 seldom	2 seldom	4	4	4	3	3	3	3	3	3	2	2	2	3	2	3	3	3	2	2	3	4	4	3	3	4	4	5	4	4
2024/01/24 9:25:03 AM CET	Physician	Male	Surgery	0-5	Worker	26-30	Single	0-1 times per week	3	1 not at all	1 never	1 never	5 totally	5 totally	5 totally	2	2	5 totally true	5 totally true	4	5 totally true	4	4	4	3	3	3	2	4	4	3	3	5	3	4	5	3	2	5	2	3
2024/01/24 9:29:36 AM CET	Physician	Female	radioterapia	0-5	manager	31-35	Married/in a relationship	2-3 times per week	2	2	1 never	1 never	2	2	2	4	2	2	3	3	2	4	3	3	2	4	4	2	3	3	2	4	5	1	4	2	4	2	4	1	3
2024/01/24 9:30:14 AM CET	Nurse	Female	Internal medicine	0-5	Worker	26-30	Married/in a relationship	0-1 times per week	2	3	2 seldom	2 seldom	4	4	5 totally	3	1 not at all	4	4	1 not at all true	2	4	2	2	4	2	3	3	3	3	4	3	5	2	4	1	4	1	4	1	4
2024/01/24 9:37:11 AM CET	Nurse	Female	Cardiologia	16-20	Worker	51-55	Married/in a relationship	0-1 times per week	5 totally	1 not at all	4 often	3 sometimes	4	3	3	5 totally	2	1 not at all true	1 not at all true	4	5 totally true	4	4	4	2	2	3	3	4	4	4	1	5	4	5	5	5	1	5	1	3
2024/01/24 9:37:42 AM CET	Nurse	Female	Emergency medicine	16-20	manager	41-45	Married/in a relationship	0-1 times per week	3	2	1 never	1 never	4	4	4	3	4	3	3	2	3	3	3	3	4	3	3	3	3	3	3	4	5	3	3	3	3	3	4	3	4
2024/01/24 9:39:39 AM CET	Hospitality staff	Female	Administration	0-5	Executive	31-35	Married/in a relationship	0-1 times per week	3	2	3 sometimes	2 seldom	3	3	4	4	4	3	3	3	3	3	3	3	4	3	3	3	3	3	2	3	4	2	3	3	5	1	4	3	4
2024/01/24 9:41:11 AM CET	Administrative sector worker	Female	Outpatient	> 20	Worker	41-45	Single	0-1 times per week	3	2	1 never	1 never	4	4	4	4	3	2	2	1 not at all true	1 not at all true	4	3	2	4	4	3	4	3	4	3	3	5	2	4	4	5	2	4	3	5
2024/01/24 10:05:34 AM CET	Physician	Male	Surgery	11-15	Manager	35-40	Married/in a relationship	0-1 times per week	4	3	1 never	1 never	5 totally	4	5 totally	5 totally	4	3	3	4	2	3	3	2	4	3	4	4	3	4	3	5	5	1	5	3	3	2	5	2	4
2024/01/24 10:11:23 AM CET	Physician	Male	Emergency medicine	0-5	Worker	31-35	Single	0-1 times per week	3	4	1 never	1 never	3	3	4	3	3	3	3	3	2	3	3	3	3	3	2	3	3	3	3	4	5	2	4	4	3	1	4	2	2
2024/01/24 10:12:34 AM CET	Codificatore	Female	EOCOD	0-5	Worker	>60	Married/in a relationship	4-5 times per week	3	2	1 never	1 never	5 totally	5 totally	5 totally	3	4	4	4	1 not at all true	3	4	4	3	4	4	4	4	3	4	3	1	5	1	4	2	4	3	5	3	4
2024/01/24 10:12:44 AM CET	Physician	Female	Internal medicine	16-20	manager	41-45	Married/in a relationship	0-1 times per week	3	4	1 never	1 never	4	3	4	3	3	4	4	4	4	2	2	3	1	3	2	1	1	3	3	1	5	3	4	2	5	2	3	2	5
2024/01/24 10:24:15 AM CET	Physician	Male	Internal medicine	11-15	manager	41-45	Married/in a relationship	0-1 times per week	4	2	1 never	1 never	5 totally	5 totally	5 totally	3	4	4	4	3	3	4	4	4	4	4	3	3	4	3	4	4	4	5	4	1	3	2	3	2	3
2024/01/24 10:31:55 AM CET	Administrative sector worker	Male	Administration	0-5	Executive	51-55	Married/in a relationship	0-1 times per week	2	1 not at all	2 seldom	1 never	5 totally	5 totally	5 totally	3	2	4	5 totally true	4	4	3	2	2	2	2	2	2	2	3	3	2	5	2	1	1	4	2	4	2	5
2024/01/24 10:35:51 AM CET	Physician	Male	Emergency medicine	0-5	manager	35-40	Married/in a relationship	2-3 times per week	3	2	1 never	1 never	4	4	4	3	3	4	4	5 totally true	5 totally true	3	4	3	4	2	2	3	3	2	3	3	4	3	2	2	4	3	3	3	3
2024/01/24 10:45:55 AM CET	Nurse	Male	Emergency medicine	> 20	manager	41-45	Married/in a relationship	0-1 times per week	4	1 not at all	1 never	2 seldom	3	3	4	3	3	2	3	2	3	3	3	3	4	3	3	3	2	3	3	2	4	2	4	3	5	3	4	2	5
2024/01/24 10:51:08 AM CET	Nurse	Female	Emergency medicine	0-5	Worker	26-30	Married/in a relationship	4-5 times per week	3	1 not at all	3 sometimes	1 never	4	4	4	3	3	4	2	3	3	4	3	2	4	3	3	3	2	3	3	4	4	3	3	3	2	2	4	3	4
2024/01/24 10:53:58 AM CET	Technician	Female	Technical sector	> 20	Worker	>60	Married/in a relationship	0-1 times per week	5 totally	2	1 never	1 never	3	2	2	2	5 totally	2	2	1 not at all true	2	4	4	4	4	4	4	4	4	4	4	2	5	1	3	2	5	2	5	3	5
2024/01/24 10:54:09 AM CET	Assistente geriatrica vecchia formazione parificavile OSS	Female	Internal medicine	> 20	Worker	>60	Married/in a relationship	2-3 times per week	3	3	2 seldom	1 never	3	2	2	2	3	3	3	1 not at all true	1 not at all true	2	2	3	4	4	3	4	2	4	1	3	5	1	3	1	5	1	5	3	3
2024/01/24 11:04:23 AM CET	Nurse	Male	Internal medicine	6-10	executive	31-35	Married/in a relationship	0-1 times per week	3	1 not at all	2 seldom	2 seldom	4	4	4	4	3	4	4	4	4	4	3	3	3	3	3	3	2	3	3	5	4	4	3	4	3	3	4	3	3
2024/01/24 11:08:23 AM CET	Technician	Female	Technical sector	> 20	Worker	41-45	Married/in a relationship	0-1 times per week	2	3	3 sometimes	1 never	2	2	2	2	3	2	2	2	2	3	3	2	2	2	3	2	2	3	2	4	4	3	2	3	3	3	4	3	3
2024/01/24 11:16:12 AM CET	Worker	Male	Technical sector	11-15	Executive	35-40	Married/in a relationship	2-3 times per week	4	3	2 seldom	1 never	4	3	4	4	4	4	4	3	3	4	3	4	3	3	3	3	3	3	3	4	4	2	5	3	3	2	4	1	5
2024/01/24 11:26:42 AM CET	Physician	Male	Intensive care medicine	0-5	Worker	31-35	Married/in a relationship	0-1 times per week	2	2	1 never	1 never	3	2	4	3	1 not at all	2	2	2	2	1	0	1	1	1	1	1	0	1	0	3	3	1	2	1	1	3	1	5	4
2024/01/24 11:30:05 AM CET	Physician	Female	Cardiologia	> 20	manager	>60	Married/in a relationship	0-1 times per week	3	4	2 seldom	1 never	3	3	2	3	5 totally	5 totally true	1 not at all true	2	2	4	4	3	4	4	3	3	4	4	3	2	5	3	4	1	5	2	4	2	5
2024/01/24 11:40:43 AM CET	Nurse	Female	Reparto di surgery	11-15	Worker	31-35	Married/in a relationship	0-1 times per week	4	3	2 seldom	1 never	4	5 totally	4	2	4	4	4	4	3	4	3	3	4	4	4	3	2	2	1	5	4	4	2	1	2	5	4	5	2
2024/01/24 11:44:54 AM CET	Physician	Female	Surgery	0-5	Worker	26-30	Single	0-1 times per week	2	1 not at all	2 seldom	1 never	4	4	3	4	2	3	4	5 totally true	3	3	4	1	4	2	4	3	3	4	4	5	5	1	2	1	4	2	4	2	4
2024/01/24 12:02:58 PM CET	Nurse	Female	Anaesthesia	0-5	manager	35-40	Married/in a relationship	2-3 times per week	2	2	3 sometimes	1 never	3	2	2	3	2	2	2	1 not at all true	1 not at all true	4	4	4	3	3	4	3	3	4	3	3	4	3	4	2	3	3	4	2	4
2024/01/24 12:21:43 PM CET	Hospitality staff	Female	Hospitality	0-5	Worker	51-55	Single	0-1 times per week	5 totally	2	2 seldom	3 sometimes	4	4	4	4	3	2	2	3	3	4	4	4	4	3	4	3	4	4	4	3	5	2	4	3	5	2	4	3	4
2024/01/24 12:31:55 PM CET	Nurse	Female	Internal medicine	6-10	Worker	41-45	Married/in a relationship	0-1 times per week	3	1 not at all	2 seldom	3 sometimes	3	3	3	2	2	2	2	3	3	4	4	3	3	4	4	3	3	4	3	2	4	1	3	1	4	2	4	3	5
2024/01/24 12:33:14 PM CET	Physician	Female	Emergency medicine	0-5	manager	31-35	Married/in a relationship	0-1 times per week	3	1 not at all	1 never	2 seldom	4	4	4	3	3	4	3	4	4	4	3	3	3	4	4	3	3	3	4	2	5	2	4	3	4	2	5	2	3
2024/01/24 12:38:52 PM CET	Nurse	Female	Internal medicine	0-5	Worker	18-25	Single	2-3 times per week	2	1 not at all	1 never	1 never	4	3	4	2	2	3	3	3	3	3	2	2	3	3	3	3	2	3	3	3	4	2	4	3	3	2	4	2	3
2024/01/24 12:50:04 PM CET	Nurse	Female	Internal medicine	0-5	Worker	46-50	Single	0-1 times per week	4	4	2 seldom	1 never	4	4	5 totally	4	5 totally	5 totally true	4	3	4	4	3	3	4	2	3	4	3	4	3	4	5	3	4	5	4	3	4	1	3
2024/01/24 12:50:16 PM CET	Technician	Female	Technical sector	6-10	Worker	31-35	Married/in a relationship	0-1 times per week	3	1 not at all	2 seldom	2 seldom	4	4	4	1 not at all	3	2	2	1 not at all true	1 not at all true	3	3	2	1	2	2	3	2	2	2	4	4	3	3	2	3	3	3	3	4
2024/01/24 12:58:51 PM CET	Nurse	Female	Surgery	11-15	Worker	35-40	Single	0-1 times per week	5 totally	2	5 very often	3 sometimes	5 totally	5 totally	5 totally	3	3	3	4	5 totally true	5 totally true	0	2	1	1	1	2	1	1	2	1	3	5	2	2	4	3	1	5	1	5
2024/01/24 1:04:51 PM CET	Physician	Male	Emergency medicine	6-10	Manager	35-40	Single	2-3 times per week	4	4	1 never	1 never	3	2	3	2	3	2	2	2	2	4	4	3	4	4	4	4	4	4	3	5	5	2	5	1	5	1	5	3	5
2024/01/24 1:08:46 PM CET	Nurse	Female	Intensive care medicine	> 20	manager	46-50	Single	2-3 times per week	5 totally	1 not at all	4 often	1 never	5 totally	4	5 totally	4	4	5 totally true	3	3	4	4	3	3	4	4	3	3	4	4	4	4	4	1	4	1	3	2	5	1	5
2024/01/24 1:16:11 PM CET	Physician	Male	Internal medicine	0-5	Worker	31-35	Married/in a relationship	2-3 times per week	3	2	2 seldom	2 seldom	4	4	4	3	3	2	4	1 not at all true	3	4	4	2	4	4	4	3	3	4	3	4	4	2	4	2	4	3	4	2	4
2024/01/24 1:34:09 PM CET	Nurse	Female	Anaesthesia	> 20	manager	56-60	Married/in a relationship	2-3 times per week	4	3	3 sometimes	1 never	4	4	4	4	3	4	3	3	3	4	3	2	4	3	4	3	3	4	3	3	4	1	3	5	4	4	5	4	3
2024/01/24 1:47:46 PM CET	Administrative sector worker	Female	Otorinolaringoiatria	> 20	Worker	56-60	Married/in a relationship	0-1 times per week	5 totally	1 not at all	1 never	1 never	5 totally	5 totally	5 totally	5 totally	5 totally	1 not at all true	1 not at all true	1 not at all true	5 totally true	4	4	4	4	4	4	4	4	4	4	5	5	1	5	4	5	1	5	1	5
2024/01/24 1:54:53 PM CET	Administrative sector worker	Female	Cardiologia	> 20	Worker	>60	Married/in a relationship	4-5 times per week	5 totally	3	1 never	2 seldom	3	1 not at all	3	5 totally	5 totally	1 not at all true	1 not at all true	1 not at all true	1 not at all true	4	4	3	4	4	4	3	3	4	4	4	5	1	5	5	5	1	5	3	4
2024/01/24 2:06:14 PM CET	Worker	Female	Internal medicine	0-5	Worker	31-35	Married/in a relationship	0-1 times per week	2	1 not at all	2 seldom	1 never	3	3	4	3	2	3	3	3	4	2	3	3	3	2	1	2	1	2	3	2	5	4	2	2	5	3	4	2	3
2024/01/24 2:11:04 PM CET	Hospitality staff	Female	Hospitality	> 20	Worker	51-55	Married/in a relationship	4-5 times per week	4	4	1 never	1 never	3	3	3	1 not at all	1 not at all	1 not at all true	1 not at all true	1 not at all true	1 not at all true	4	4	3	4	4	4	4	4	4	3	5	5	1	4	1	5	1	5	1	5
2024/01/24 2:11:58 PM CET	Nurse	Female	Internal medicine	6-10	Worker	26-30	Single	2-3 times per week	2	1 not at all	2 seldom	1 never	3	4	5 totally	3	2	4	3	4	4	3	3	4	3	3	2	4	2	3	3	4	4	3	3	3	3	3	4	2	3
2024/01/24 2:19:05 PM CET	Nurse	Female	Surgery	0-5	infermiera	18-25	Married/in a relationship	0-1 times per week	3	1 not at all	1 never	1 never	3	4	4	4	4	4	3	4	4	2	3	2	3	2	3	3	2	3	2	4	4	2	3	3	4	2	4	2	3
2024/01/24 2:30:39 PM CET	Nurse	Female	Surgery	> 20	executive	46-50	Single	2-3 times per week	3	2	2 seldom	2 seldom	4	4	4	2	3	3	2	1 not at all true	2	3	3	2	4	4	3	3	4	3	3	5	5	1	3	4	3	2	4	1	3
2024/01/24 2:35:56 PM CET	Nurse	Male	Surgery e ostetricia	11-15	Worker	51-55	Married/in a relationship	0-1 times per week	3	3	3 sometimes	1 never	3	3	4	3	3	3	4	3	3	3	3	3	4	4	3	2	3	3	3	4	4	3	4	3	4	4	4	4	4
2024/01/24 2:46:01 PM CET	Nurse	Female	Anaesthesia	6-10	manager	35-40	Married/in a relationship	0-1 times per week	3	1 not at all	1 never	1 never	4	4	4	2	3	3	4	2	1 not at all true	3	2	1	3	2	2	3	2	4	3	2	5	1	2	3	5	3	4	5	4
2024/01/24 2:48:40 PM CET	Technician	Female	TAB	> 20	TAB	51-55	Married/in a relationship	0-1 times per week	1 not at all	1 not at all	2 seldom	1 never	2	2	2	2	2	1 not at all true	1 not at all true	1 not at all true	1 not at all true	3	3	3	2	2	3	3	3	3	2	4	4	2	4	3	3	3	4	2	4
2024/01/24 2:48:49 PM CET	Technician	Female	Technical sector	0-5	Worker	26-30	Married/in a relationship	0-1 times per week	2	2	3 sometimes	1 never	2	2	3	1 not at all	3	1 not at all true	1 not at all true	2	1 not at all true	3	3	2	3	2	2	2	3	2	1	4	4	3	4	4	3	3	3	3	2
2024/01/24 2:54:00 PM CET	Nurse	Female	Internal medicine	0-5	Worker	26-30	Married/in a relationship	4-5 times per week	5 totally	3	3 sometimes	3 sometimes	4	4	3	3	3	3	3	3	3	3	3	2	4	4	3	2	1	3	3	2	4	1	2	1	4	2	5	2	5
2024/01/24 3:12:36 PM CET	Technician	Male	Tecnical sector	6-10	Worker	26-30	Married/in a relationship	0-1 times per week	4	3	1 never	1 never	5 totally	4	4	3	4	4	3	3	2	3	3	3	4	3	3	3	2	3	3	2	4	1	3	4	4	2	4	2	3
2024/01/24 3:27:03 PM CET	Nurse	Female	Outpatient	> 20	Worker	51-55	Married/in a relationship	4-5 times per week	4	1 not at all	5 very often	5 very often	3	3	2	4	3	4	2	1 not at all true	1 not at all true	4	3	4	4	4	3	4	3	4	2	3	5	1	3	1	4	3	5	5	4
2024/01/24 3:47:09 PM CET	Nurse	Female	Intensive care medicine	0-5	manager	35-40	Single	2-3 times per week	3	1 not at all	3 sometimes	3 sometimes	4	4	4	4	4	5 totally true	5 totally true	5 totally true	3	4	4	4	4	4	4	4	3	4	3	3	5	3	3	2	3	3	4	1	5
2024/01/24 3:50:09 PM CET	Nurse	Female	Outpatient	16-20	executive	41-45	Married/in a relationship	0-1 times per week	3	2	4 often	4 often	4	3	4	4	3	3	3	4	4	3	4	3	3	3	4	3	3	3	3	3	5	4	4	3	3	4	5	3	4
2024/01/24 4:07:38 PM CET	Nurse	Female	Internal medicine	> 20	Worker	51-55	Married/in a relationship	0-1 times per week	3	3	1 never	1 never	4	4	5 totally	5 totally	3	2	2	4	2	4	4	2	1	2	2	1	4	4	3	5	5	1	3	5	5	1	5	1	4
2024/01/24 4:25:39 PM CET	Physician	Male	Internal medicine	16-20	Executive	46-50	Married/in a relationship	more than 5 times per week	3	2	3 sometimes	3 sometimes	5 totally	5 totally	5 totally	4	3	5 totally true	5 totally true	5 totally true	3	3	3	4	4	4	4	4	4	4	3	3	4	3	4	1	4	2	4	3	4
2024/01/24 4:51:40 PM CET	Administrative sector worker	Female	Internal medicine	> 20	Worker	41-45	Single	0-1 times per week	5 totally	2	4 often	3 sometimes	4	4	5 totally	4	2	1 not at all true	2	1 not at all true	3	4	3	2	2	2	3	4	3	4	4	3	5	1	3	3	3	4	5	2	3
2024/01/24 4:57:12 PM CET	Physician	Male	Cardiologia	16-20	Executive	51-55	Married/in a relationship	2-3 times per week	4	4	2 seldom	1 never	4	4	4	4	3	2	4	2	2	3	3	2	3	3	2	2	2	4	3	4	5	1	3	2	3	3	5	3	4
2024/01/24 5:25:47 PM CET	Nurse	Male	Surgery	11-15	manager	46-50	Married/in a relationship	0-1 times per week	1 not at all	2	1 never	1 never	4	4	4	4	4	4	4	4	2	4	4	3	4	4	3	4	3	4	4	2	5	2	5	3	4	3	5	2	4
2024/01/24 5:36:37 PM CET	Administrative sector worker	Female	Emergency medicine	> 20	Worker	>60	Single	more than 5 times per week	5 totally	4	5 very often	4 often	3	3	3	4	4	3	3	3	3	2	2	2	2	3	2	3	3	3	3	2	5	1	4	2	4	2	4	2	3
2024/01/24 6:17:48 PM CET	Physician	Male	Surgery	0-5	Physician borsista	26-30	Single	0-1 times per week	3	1 not at all	1 never	1 never	5 totally	5 totally	5 totally	5 totally	3	5 totally true	5 totally true	5 totally true	5 totally true	4	3	3	2	0	4	1	0	1	0	1	5	4	3	1	3	5	3	5	5
2024/01/24 6:29:36 PM CET	Physician	Female	Services	0-5	Manager	31-35	Married/in a relationship	2-3 times per week	1 not at all	2	1 never	1 never	3	2	2	2	1 not at all	2	2	1 not at all true	1 not at all true	3	3	1	2	1	2	3	1	2	2	4	4	2	1	3	2	3	5	4	3
2024/01/24 6:32:03 PM CET	Nurse	Female	Internal medicine	6-10	Worker	31-35	Married/in a relationship	2-3 times per week	2	1 not at all	1 never	1 never	4	3	4	4	2	2	2	2	2	2	2	2	2	3	3	2	2	3	2	4	4	4	2	4	4	3	4	4	3
2024/01/24 6:33:53 PM CET	Physician	Male	Emergency medicine	6-10	manager	31-35	Married/in a relationship	2-3 times per week	3	2	2 seldom	1 never	3	2	2	4	3	3	3	4	2	4	3	3	4	4	4	3	3	3	3	2	5	2	3	5	4	3	5	2	2
2024/01/24 8:02:55 PM CET	Physician	Male	Internal medicine	11-15	executive	41-45	Married/in a relationship	more than 5 times per week	5 totally	3	4 often	4 often	5 totally	5 totally	5 totally	5 totally	4	5 totally true	5 totally true	5 totally true	5 totally true	4	4	4	4	4	4	4	4	4	4	3	5	2	5	2	3	3	5	2	5
2024/01/24 8:55:45 PM CET	Nurse	Female	Emergency medicine	6-10	Worker	26-30	Married/in a relationship	0-1 times per week	2	1 not at all	1 never	1 never	5 totally	4	5 totally	4	2	2	2	2	2	4	3	2	4	2	4	4	4	4	2	5	5	1	3	5	2	1	5	5	5
2024/01/24 9:15:54 PM CET	Nurse	Female	maternità	> 20	Nurse	46-50	Married/in a relationship	2-3 times per week	3	1 not at all	2 seldom	1 never	4	4	4	4	4	2	1 not at all true	1 not at all true	1 not at all true	3	3	3	4	4	3	4	2	3	3	4	5	2	5	4	4	3	4	2	3
2024/01/24 9:21:31 PM CET	Nurse	Female	Anaesthesia	> 20	manager	51-55	Married/in a relationship	2-3 times per week	4	2	2 seldom	1 never	4	3	3	4	3	4	4	4	3	3	3	2	2	3	3	3	3	3	3	3	4	2	3	5	3	2	5	3	3
2024/01/24 10:12:55 PM CET	Nurse	Female	Internal medicine	6-10	Worker	41-45	Married/in a relationship	2-3 times per week	3	4	3 sometimes	3 sometimes	4	4	4	4	3	3	3	3	2	3	3	3	3	3	2	2	3	3	3	3	3	4	4	3	4	4	3	4	4
2024/01/24 10:14:24 PM CET	Nurse	Male	Internal medicine	0-5	Worker	31-35	Married/in a relationship	0-1 times per week	2	1 not at all	1 never	1 never	2	2	3	2	2	3	3	4	3	3	3	2	3	1	4	2	3	4	3	3	5	1	2	3	2	2	4	2	3
2024/01/24 10:17:02 PM CET	Nurse	Male	Internal medicine	0-5	Worker	26-30	Single	4-5 times per week	2	3	1 never	1 never	4	4	5 totally	4	2	4	4	4	3	3	3	3	2	3	3	3	3	3	2	2	3	4	4	1	3	2	4	2	3
2024/01/25 2:33:36 AM CET	Nurse	Male	Intensive care medicine	> 20	manager	46-50	Married/in a relationship	4-5 times per week	3	4	1 never	1 never	4	4	4	3	3	3	4	2	3	2	3	2	3	3	3	3	3	3	3	4	4	4	3	4	3	3	4	3	4
2024/01/25 4:45:21 AM CET	Nurse	Female	Neurosurgery	6-10	Worker	41-45	Married/in a relationship	4-5 times per week	3	1 not at all	1 never	1 never	4	3	4	4	5 totally	3	3	1 not at all true	3	3	4	3	4	4	4	2	4	4	2	3	5	1	3	3	5	2	4	3	2
2024/01/25 7:21:10 AM CET	Physician	Female	Emergency medicine	0-5	Worker	18-25	Single	0-1 times per week	3	4	3 sometimes	3 sometimes	4	4	4	4	4	3	3	3	2	4	4	3	4	4	3	4	3	3	4	4	5	3	5	2	3	2	5	3	4
2024/01/25 7:22:40 AM CET	Physician	Female	Emergency medicine	0-5	manager	31-35	Single	2-3 times per week	1 not at all	1 not at all	1 never	1 never	4	3	5 totally	4	3	4	5 totally true	5 totally true	4	4	3	3	3	3	2	4	2	3	2	1	5	2	3	3	5	3	5	3	5
2024/01/25 7:29:21 AM CET	Nurse	Female	Emergency medicine	11-15	manager	31-35	Married/in a relationship	0-1 times per week	1 not at all	1 not at all	1 never	1 never	5 totally	4	4	3	1 not at all	3	2	4	3	4	3	2	4	4	3	4	3	4	2	1	4	3	4	5	3	2	3	4	1
2024/01/25 7:33:20 AM CET	Nurse	Female	Emergency medicine	11-15	manager	35-40	Married/in a relationship	4-5 times per week	1 not at all	2	4 often	2 seldom	4	3	4	4	3	3	2	2	3	4	3	2	4	3	3	3	2	3	3	4	5	2	4	2	4	2	4	2	4
2024/01/25 7:53:30 AM CET	Nurse	Female	Intensive care medicine	> 20	Manager	51-55	Single	4-5 times per week	5 totally	3	5 very often	1 never	5 totally	5 totally	5 totally	4	5 totally	5 totally true	4	5 totally true	5 totally true	3	3	2	3	3	3	2	3	3	3	4	5	3	4	1	3	2	5	2	4
2024/01/25 7:53:41 AM CET	Technician	Female	Technical sector	16-20	Worker	51-55	Married/in a relationship	2-3 times per week	3	1 not at all	3 sometimes	1 never	4	4	4	2	3	2	1 not at all true	1 not at all true	1 not at all true	3	2	2	0	1	3	4	2	3	2	5	5	3	4	1	3	3	4	3	4
2024/01/25 8:12:04 AM CET	Administrative sector worker	Female	Services	0-5	Manager	31-35	Married/in a relationship	0-1 times per week	3	2	1 never	1 never	4	3	4	4	4	3	3	4	5 totally true	4	4	3	4	3	4	4	4	4	3	3	5	1	4	2	5	1	5	2	5
2024/01/25 9:20:57 AM CET	Administrative sector worker	Female	Internal medicine	6-10	Worker	41-45	Married/in a relationship	2-3 times per week	4	3	1 never	1 never	3	3	3	3	4	3	3	3	3	4	4	3	4	3	3	4	3	3	3	4	4	1	4	3	4	2	5	2	2
2024/01/25 9:42:41 AM CET	Hospitality staff	Female	Hospitality	16-20	Worker	51-55	Married/in a relationship	2-3 times per week	1 not at all	2	2 seldom	1 never	2	2	2	3	2	2	2	2	2	3	3	3	3	2	3	3	3	3	2	3	5	1	3	3	4	2	4	2	4
2024/01/25 9:47:22 AM CET	Nurse	Female	Surgery e ostetricia	> 20	Worker	51-55	Married/in a relationship	2-3 times per week	4	3	5 very often	5 very often	3	3	4	3	3	3	3	2	2	3	4	2	3	3	3	3	2	4	4	5	5	3	3	2	1	4	4	4	3
2024/01/25 10:13:16 AM CET	Physician	Male	Intensive care medicine	> 20	Executive	46-50	Married/in a relationship	0-1 times per week	3	5 totally	1 never	1 never	5 totally	4	5 totally	4	2	5 totally true	4	3	3	3	2	4	4	3	2	3	2	4	3	4	5	2	4	3	4	1	5	2	4
2024/01/25 10:14:10 AM CET	Hospitality staff	Female	Hospitality	6-10	Worker	41-45	Married/in a relationship	2-3 times per week	4	3	3 sometimes	1 never	3	1 not at all	3	3	3	3	3	1 not at all true	1 not at all true	4	4	4	4	4	4	4	4	4	4	2	5	1	4	3	5	3	5	3	5
2024/01/25 10:32:30 AM CET	Study coordinator	Female	Unità di ricerca clinica	0-5	coordinatore	46-50	Married/in a relationship	0-1 times per week	3	1 not at all	1 never	1 never	4	4	5 totally	4	5 totally	1 not at all true	2	1 not at all true	2	3	2	1	2	3	2	3	1	3	1	2	5	4	2	2	4	3	5	4	2
2024/01/25 10:46:08 AM CET	Technician	Female	Services	16-20	tecnico di services/specializzata in senologia	51-55	Single	2-3 times per week	4	3	5 very often	4 often	4	3	3	3	4	5 totally true	1 not at all true	3	1 not at all true	4	4	4	4	4	4	3	3	4	3	5	5	2	4	4	4	1	5	1	3
2024/01/25 10:50:00 AM CET	Nurse	Female	Intensive care medicine	> 20	manager	51-55	Single	0-1 times per week	1 not at all	4	1 never	1 never	2	2	2	3	3	2	2	3	2	2	3	0	2	2	4	1	1	4	3	3	5	4	3	5	5	3	4	3	3
2024/01/25 10:50:30 AM CET	Nurse	Female	Internal medicine	11-15	Worker	35-40	Married/in a relationship	0-1 times per week	3	1 not at all	1 never	1 never	5 totally	4	4	4	3	2	3	3	3	3	2	2	2	2	3	2	2	3	2	3	5	3	3	2	4	2	5	3	4
2024/01/25 11:28:52 AM CET	Physician	Male	Surgery	6-10	Physician	31-35	Married/in a relationship	0-1 times per week	2	1 not at all	1 never	1 never	5 totally	5 totally	5 totally	4	3	3	3	4	2	4	4	3	4	4	3	4	0	3	3	3	5	1	4	4	4	3	4	3	3
2024/01/25 12:11:31 PM CET	Physician	Female	Internal medicine	6-10	Worker	35-40	Single	2-3 times per week	2	2	3 sometimes	3 sometimes	5 totally	4	5 totally	3	3	3	3	3	3	4	3	0	4	4	4	3	3	4	3	5	5	1	5	3	3	1	5	1	5
2024/01/25 12:15:35 PM CET	Nurse	Female	Internal medicine	6-10	Worker	31-35	Single	2-3 times per week	3	2	2 seldom	1 never	4	3	3	2	3	4	4	2	2	3	2	3	1	3	3	3	2	2	2	5	4	1	4	2	2	2	5	1	3
2024/01/25 12:25:22 PM CET	Nurse	Male	Emergency medicine	0-5	Worker	35-40	Married/in a relationship	0-1 times per week	3	1 not at all	1 never	1 never	3	3	3	2	3	3	3	4	4	4	2	4	3	2	2	3	3	3	2	3	4	3	4	3	5	3	4	4	5
2024/01/25 12:48:31 PM CET	Technician	Female	Eolab	> 20	Tecnico di services biophysician	>60	Married/in a relationship	2-3 times per week	2	3	3 sometimes	1 never	3	3	3	2	4	2	2	1 not at all true	2	4	4	3	3	4	3	4	3	4	3	4	5	2	4	3	5	3	5	3	4
2024/01/25 12:52:03 PM CET	Physician	Male	Surgery	11-15	Executive	41-45	Married/in a relationship	0-1 times per week	4	5 totally	1 never	1 never	5 totally	5 totally	5 totally	5 totally	4	5 totally true	5 totally true	3	3	4	4	2	4	4	4	3	4	4	2	2	5	2	4	5	4	2	5	5	5
2024/01/25 1:09:22 PM CET	Administrative sector worker	Female	Internal medicine	> 20	Worker	41-45	Single	0-1 times per week	4	2	3 sometimes	1 never	4	3	5 totally	4	5 totally	2	1 not at all true	1 not at all true	1 not at all true	4	4	2	4	4	3	4	3	4	4	5	5	1	5	3	5	1	5	3	5
2024/01/25 1:19:29 PM CET	Technician	Female	Technical sector	0-5	Executive	26-30	Married/in a relationship	2-3 times per week	3	2	1 never	1 never	3	3	3	2	4	2	2	4	3	3	2	0	3	3	2	2	0	1	0	5	4	5	4	4	2	2	5	1	4
2024/01/25 1:26:55 PM CET	Nurse	Female	Surgery	0-5	Worker	31-35	Single	2-3 times per week	2	1 not at all	2 seldom	2 seldom	4	4	3	2	3	4	4	3	3	4	4	2	4	4	3	4	3	4	3	2	4	3	2	1	4	2	3	3	5
2024/01/25 1:34:29 PM CET	Technician	Female	Technical sector	11-15	Worker	51-55	Married/in a relationship	2-3 times per week	3	1 not at all	4 often	1 never	5 totally	4	5 totally	4	3	4	4	2	2	4	3	2	3	4	1	4	2	3	4	4	4	3	4	2	1	1	4	2	2
2024/01/25 2:01:32 PM CET	Administrative sector worker	Female	Administration	> 20	Worker	>60	Married/in a relationship	2-3 times per week	2	5 totally	2 seldom	1 never	4	4	4	3	3	2	2	3	3	3	3	3	3	1	2	3	3	3	3	3	5	1	5	3	5	1	4	1	3
2024/01/25 2:12:38 PM CET	Nurse	Female	Intensive care medicine	> 20	manager	46-50	Single	2-3 times per week	4	2	3 sometimes	3 sometimes	3	2	2	4	4	5 totally true	2	3	2	3	3	3	4	3	4	3	3	4	3	4	5	1	4	2	5	3	4	3	5
2024/01/25 2:29:48 PM CET	Lavoratore del serviceso qualità e sicurezza dei pazienti	Male	Serviceso qualità e sicurezza dei pazienti	6-10	Responsabile di serviceso	41-45	Married/in a relationship	2-3 times per week	4	1 not at all	1 never	1 never	5 totally	4	4	4	3	1 not at all true	1 not at all true	1 not at all true	2	3	3	1	0	2	3	1	4	3	3	5	4	2	3	4	2	3	4	2	2
2024/01/25 3:01:11 PM CET	consulente salute sessuale	Female	consultorio salute sessuale	16-20	consulente	41-45	Married/in a relationship	2-3 times per week	4	1 not at all	4 often	2 seldom	4	4	4	4	4	2	4	5 totally true	4	3	2	3	3	3	3	3	3	3	3	3	4	2	4	1	4	2	4	2	4
2024/01/25 3:13:46 PM CET	Technician	Female	services	> 20	tecnico di analisi biomediche	46-50	Single	0-1 times per week	3	3	4 often	4 often	3	3	3	3	2	2	2	2	2	2	2	3	3	2	3	2	2	3	2	4	5	3	3	2	3	2	5	2	3
2024/01/25 3:17:04 PM CET	Nurse	Male	Emergency medicine	> 20	manager	51-55	Married/in a relationship	2-3 times per week	4	3	3 sometimes	3 sometimes	4	4	4	4	4	4	4	4	5 totally true	3	3	3	4	4	4	4	3	4	3	4	5	2	3	1	4	4	5	3	4
2024/01/25 5:18:05 PM CET	Tecnica di sala operatoria	Female	Anaesthesia	11-15	Worker	35-40	Single	0-1 times per week	2	1 not at all	1 never	1 never	3	4	4	5 totally	3	3	3	2	2	3	2	1	1	2	2	1	3	3	3	4	4	3	2	3	3	3	4	3	4
2024/01/25 5:25:24 PM CET	Nurse	Female	Surgery e ostetricia	11-15	Worker	35-40	Married/in a relationship	0-1 times per week	2	3	1 never	2 seldom	3	3	4	1 not at all	4	2	3	3	3	2	2	3	3	3	3	2	3	4	2	5	4	4	3	5	2	4	3	4	5
2024/01/25 5:58:26 PM CET	Physician	Male	Surgery	> 20	Primario	51-55	Married/in a relationship	4-5 times per week	4	1 not at all	3 sometimes	1 never	4	4	4	4	4	4	4	3	2	3	4	4	4	4	4	4	4	4	4	3	5	2	4	4	4	4	4	2	4
2024/01/25 6:38:39 PM CET	Physician	Female	Surgery e ostetricia	16-20	Executive	46-50	Married/in a relationship	0-1 times per week	1 not at all	4	1 never	1 never	1 not at all	1 not at all	1 not at all	3	1 not at all	1 not at all true	1 not at all true	1 not at all true	1 not at all true	4	3	4	4	3	3	4	4	4	2	4	5	4	2	3	5	2	5	5	4
2024/01/25 8:30:11 PM CET	Nurse	Female	Internal medicine	6-10	Worker	26-30	Single	2-3 times per week	3	1 not at all	1 never	1 never	4	4	4	3	3	3	3	2	2	3	3	2	2	4	3	3	3	3	2	2	4	3	4	4	5	3	3	3	3
2024/01/25 8:48:03 PM CET	Physician	Male	Surgery	16-20	Executive	46-50	Married/in a relationship	0-1 times per week	3	2	1 never	1 never	4	4	4	4	3	4	2	2	2	4	3	3	4	4	4	4	4	4	4	3	5	2	4	3	4	2	4	2	4
2024/01/25 9:02:17 PM CET	Nurse	Female	Rami	0-5	Worker	41-45	Married/in a relationship	0-1 times per week	3	1 not at all	1 never	1 never	5 totally	5 totally	5 totally	3	3	4	4	4	4	4	4	3	4	3	4	4	4	4	4	2	5	1	4	2	4	2	4	1	3
2024/01/25 9:17:48 PM CET	Nurse	Female	Outpatient	> 20	Worker	51-55	Single	2-3 times per week	3	3	1 never	1 never	3	3	2	3	3	3	3	3	2	2	3	2	3	3	2	2	2	2	2	4	4	4	2	3	3	2	4	3	2
2024/01/25 9:52:12 PM CET	Nurse	Female	Intensive care medicine	> 20	manager	51-55	Married/in a relationship	0-1 times per week	3	1 not at all	3 sometimes	3 sometimes	3	3	4	4	4	3	2	2	2	4	3	2	3	4	4	3	3	3	3	2	5	4	4	4	5	3	5	3	4
2024/01/25 10:22:48 PM CET	Physician	Male	Emergency medicine	0-5	Worker	26-30	Married/in a relationship	0-1 times per week	4	5 totally	1 never	1 never	4	3	3	3	2	2	2	3	2	3	3	3	2	2	3	2	2	3	3	4	4	3	3	2	2	3	3	4	3
2024/01/26 2:05:05 AM CET	Nurse	Female	Surgery e ostetricia	0-5	Worker	26-30	Single	0-1 times per week	4	5 totally	2 seldom	1 never	4	4	4	4	4	4	3	5 totally true	5 totally true	4	3	2	3	4	3	4	3	3	2	4	4	3	4	2	4	3	4	4	4
2024/01/26 3:03:55 AM CET	Physician	Male	Pronto Soccorso	0-5	Worker	26-30	Single	2-3 times per week	5 totally	1 not at all	1 never	1 never	4	4	4	3	3	4	4	5 totally true	3	4	3	4	4	4	4	3	4	4	4	3	4	4	4	4	4	2	3	1	5
2024/01/26 3:10:56 AM CET	Physician	Male	Emergency medicine	0-5	Worker	26-30	Single	0-1 times per week	3	1 not at all	1 never	1 never	4	3	4	3	3	4	4	4	3	4	4	4	4	4	4	3	3	4	4	4	5	3	5	3	4	2	3	1	3
2024/01/26 7:25:55 AM CET	Nurse	Female	Internal medicine (ambulanti)	> 20	Worker	41-45	Single	2-3 times per week	4	2	2 seldom	1 never	3	2	2	1 not at all	4	2	2	2	2	2	3	2	3	3	2	3	3	2	2	3	4	2	3	2	2	2	4	3	2
2024/01/26 7:54:18 AM CET	Nurse	Female	Emergency medicine	16-20	manager	51-55	Married/in a relationship	4-5 times per week	3	1 not at all	4 often	4 often	4	4	4	4	4	4	2	2	2	4	4	4	4	3	4	4	4	4	4	5	5	1	4	3	3	2	5	2	4
2024/01/26 9:28:07 AM CET	Nurse	Female	Internal medicine	> 20	Worker	56-60	Married/in a relationship	2-3 times per week	3	3	3 sometimes	1 never	4	3	4	3	4	5 totally true	5 totally true	5 totally true	5 totally true	4	4	3	4	3	3	3	3	4	4	4	4	1	4	4	4	3	4	2	5
2024/01/26 10:08:30 AM CET	Physician	Male	Anaesthesia	> 20	Executive	46-50	Married/in a relationship	2-3 times per week	4	2	3 sometimes	2 seldom	3	3	3	3	3	3	2	4	2	3	3	2	4	2	2	3	3	3	2	5	5	2	4	2	2	3	4	2	3
2024/01/26 10:59:31 AM CET	Physician	Female	Internal medicine	11-15	manager	35-40	Married/in a relationship	0-1 times per week	5 totally	2	2 seldom	3 sometimes	5 totally	5 totally	5 totally	4	5 totally	5 totally true	4	5 totally true	5 totally true	4	3	4	4	3	3	4	3	4	4	3	5	4	4	2	5	1	5	4	4
2024/01/26 11:37:03 AM CET	Levatrice	Female	Surgery e ostetricia	11-15	levatrice	35-40	Married/in a relationship	0-1 times per week	3	3	1 never	1 never	4	2	3	2	4	3	3	2	2	3	2	2	2	2	3	2	2	2	1	2	4	2	3	3	5	3	4	3	3
2024/01/26 11:37:29 AM CET	Administrative sector worker	Female	Cardiologia	0-5	Worker	26-30	Married/in a relationship	2-3 times per week	1 not at all	4	1 never	1 never	3	1 not at all	4	4	4	1 not at all true	2	3	1 not at all true	4	3	3	4	4	2	4	4	3	4	4	4	4	4	2	5	1	4	1	3
2024/01/26 11:51:08 AM CET	Technician	Female	Technical sector	> 20	tab	>60	Married/in a relationship	0-1 times per week	4	1 not at all	1 never	1 never	3	3	3	2	2	2	2	1 not at all true	3	3	3	2	4	2	3	3	1	2	0	2	5	1	2	4	5	1	5	5	5
2024/01/26 11:59:15 AM CET	Nurse	Male	Internal medicine	6-10	executive	26-30	Married/in a relationship	0-1 times per week	3	3	1 never	1 never	3	3	3	3	2	1 not at all true	2	3	3	3	3	4	3	3	4	3	3	4	4	3	4	3	3	3	3	2	3	2	3
2024/01/26 12:15:43 PM CET	Nurse	Female	Surgery	> 20	Worker	46-50	Single	0-1 times per week	3	3	1 never	1 never	3	3	5 totally	3	4	4	5 totally true	5 totally true	5 totally true	4	3	3	3	3	4	4	3	4	3	2	5	5	4	5	3	2	5	4	4
2024/01/26 12:58:52 PM CET	Nurse	Male	Emergency medicine	16-20	Worker	41-45	Single	0-1 times per week	1 not at all	2	4 often	2 seldom	4	3	3	3	2	4	4	2	2	3	3	3	4	3	4	3	3	4	3	4	4	3	4	1	3	2	3	1	5
2024/01/26 1:09:18 PM CET	Administrative sector worker	Female	Internal medicine	11-15	Worker	51-55	Married/in a relationship	0-1 times per week	3	1 not at all	1 never	1 never	4	4	4	3	4	4	3	1 not at all true	1 not at all true	4	4	3	3	3	3	3	3	4	3	5	5	1	4	2	3	1	5	2	4
2024/01/26 1:53:13 PM CET	Nurse	Female	Internal medicine	11-15	manager	35-40	Married/in a relationship	0-1 times per week	3	4	1 never	1 never	3	3	3	3	5 totally	3	3	5 totally true	5 totally true	3	3	4	4	3	3	3	3	3	3	5	4	1	3	1	4	1	4	1	4
2024/01/26 2:14:40 PM CET	Hospitality staff	Female	Hospitality	0-5	dietista	26-30	Single	2-3 times per week	2	1 not at all	3 sometimes	1 never	3	2	3	3	4	2	2	2	2	4	3	2	4	3	3	3	3	4	3	4	5	1	3	3	5	2	4	3	4
2024/01/26 2:15:01 PM CET	Nurse	Female	Outpatient	> 20	Worker	46-50	Married/in a relationship	2-3 times per week	3	2	1 never	1 never	4	4	4	4	3	5 totally true	4	4	4	4	3	3	4	4	4	4	3	4	3	4	5	1	3	1	5	3	5	3	4
2024/01/26 2:34:58 PM CET	Nurse	Female	Internal medicine	> 20	Worker	51-55	Married/in a relationship	0-1 times per week	4	5 totally	5 very often	1 never	4	4	4	4	4	3	3	4	4	2	4	4	4	4	4	4	4	4	4	5	5	2	4	5	3	2	5	2	2
2024/01/26 2:50:01 PM CET	Administrative sector worker	Female	Administration	16-20	Executive	51-55	Single	0-1 times per week	3	1 not at all	1 never	1 never	4	4	4	3	4	4	4	3	3	3	2	2	3	3	3	3	2	3	2	5	5	1	3	2	3	3	5	4	4
2024/01/26 2:55:07 PM CET	Physician	Female	Internal medicine	11-15	manager	41-45	Single	0-1 times per week	1 not at all	5 totally	1 never	1 never	2	2	2	3	2	3	3	2	1 not at all true	3	3	2	2	3	3	2	2	2	4	5	5	4	1	1	2	2	4	4	5
2024/01/26 2:58:38 PM CET	Technician	Female	Outpatient	> 20	TAB	46-50	Married/in a relationship	0-1 times per week	3	1 not at all	2 seldom	1 never	4	5 totally	5 totally	4	4	2	4	4	3	3	3	3	2	3	3	4	3	3	3	3	4	3	5	3	4	1	4	1	3
2024/01/26 3:23:18 PM CET	Technician	Female	Technical sector	> 20	Worker	56-60	Single	2-3 times per week	4	1 not at all	3 sometimes	3 sometimes	5 totally	4	5 totally	4	5 totally	4	4	2	4	3	3	3	2	3	3	2	2	3	3	5	5	2	3	1	4	1	5	3	4
2024/01/26 3:57:05 PM CET	terapista	Female	Dappertutto	6-10	Worker	31-35	Married/in a relationship	2-3 times per week	4	2	2 seldom	1 never	5 totally	4	4	2	2	2	2	3	3	3	3	2	3	2	3	1	3	1	2	4	5	3	3	1	3	2	4	1	4
2024/01/26 4:24:35 PM CET	Physician	Female	Anaesthesia	0-5	Worker	31-35	Married/in a relationship	2-3 times per week	2	1 not at all	2 seldom	3 sometimes	4	4	4	3	3	5 totally true	5 totally true	3	3	3	4	3	2	0	4	3	3	4	4	1	5	1	3	1	4	5	5	2	3
2024/01/26 4:43:33 PM CET	Physician	Female	Surgery	0-5	assistente	26-30	Single	0-1 times per week	1 not at all	3	1 never	1 never	3	3	3	3	2	5 totally true	5 totally true	2	3	4	3	3	2	4	3	3	3	3	3	3	3	3	3	3	4	4	4	3	4
2024/01/26 4:49:24 PM CET	worker	Female	Internal medicine	6-10	Worker	26-30	Married/in a relationship	2-3 times per week	4	2	1 never	1 never	4	4	5 totally	4	4	3	4	5 totally true	5 totally true	3	4	3	4	4	4	4	4	4	3	5	5	1	4	5	4	1	5	3	5
2024/01/26 4:52:19 PM CET	Hospitality staff	Female	Hospitality	> 20	Manager	46-50	Married/in a relationship	0-1 times per week	5 totally	1 not at all	1 never	3 sometimes	4	4	4	4	5 totally	3	2	2	2	3	3	4	4	3	4	4	4	4	3	1	4	1	4	1	5	1	5	1	5
2024/01/27 12:39:00 AM CET	Nurse	Female	Internal medicine	> 20	Worker	51-55	Married/in a relationship	0-1 times per week	3	2	1 never	2 seldom	4	4	5 totally	4	3	3	3	3	3	4	4	2	3	3	3	4	4	4	4	5	4	2	3	5	3	3	4	3	3
2024/01/27 1:45:29 AM CET	Nurse	Female	Emergency medicine	> 20	manager	46-50	Single	2-3 times per week	4	4	1 never	1 never	4	3	4	3	3	3	4	3	3	4	3	3	4	3	3	3	3	3	3	4	5	2	3	2	4	2	4	2	3
2024/01/27 10:01:44 AM CET	Administrative sector worker	Female	Emergency medicine	16-20	Worker	51-55	Married/in a relationship	2-3 times per week	3	2	2 seldom	1 never	5 totally	4	5 totally	4	3	3	3	3	3	3	3	3	3	3	3	3	3	2	3	3	3	4	3	1	4	3	4	3	4
2024/01/27 11:05:25 AM CET	Nurse	Male	Intensive care medicine	0-5	manager	26-30	Single	0-1 times per week	2	1 not at all	1 never	1 never	4	4	4	4	2	2	2	2	3	3	3	3	2	4	4	3	4	4	2	4	5	5	5	1	4	1	4	1	4
2024/01/27 11:16:57 AM CET	Physician	Male	Otorinolaringoiatria	0-5	Worker	31-35	Single	2-3 times per week	2	5 totally	3 sometimes	3 sometimes	5 totally	5 totally	5 totally	5 totally	2	2	2	3	4	4	4	4	4	4	4	2	4	4	4	4	4	1	3	1	5	1	4	1	5
2024/01/27 2:33:54 PM CET	Physician	Female	Emergency medicine	11-15	manager	35-40	Married/in a relationship	2-3 times per week	3	1 not at all	1 never	1 never	3	3	3	3	3	4	3	2	2	4	3	3	4	4	3	3	3	3	3	4	4	2	4	4	2	3	3	2	2
2024/01/27 3:20:11 PM CET	Nurse	Female	Dialisi	> 20	Worker	46-50	Married/in a relationship	0-1 times per week	4	3	3 sometimes	2 seldom	4	2	3	3	5 totally	2	4	4	5 totally true	2	2	1	4	2	2	1	1	2	0	5	5	3	1	5	1	3	5	5	2
2024/01/27 4:19:16 PM CET	Physician	Female	Surgery e ostetricia	> 20	Executive	51-55	Married/in a relationship	0-1 times per week	4	2	1 never	1 never	4	4	5 totally	4	3	5 totally true	4	5 totally true	5 totally true	4	4	3	4	4	4	4	4	4	4	5	5	5	4	4	3	1	5	1	3
2024/01/27 4:25:49 PM CET	Physician	Male	Surgery e ostetricia	0-5	Worker	26-30	Married/in a relationship	0-1 times per week	2	3	1 never	1 never	4	4	5 totally	3	4	2	4	5 totally true	3	3	3	1	4	3	3	3	1	4	1	4	4	2	2	2	4	2	4	3	3
2024/01/27 8:56:14 PM CET	Nurse	Female	CREOC	> 20	Worker	46-50	Single	0-1 times per week	3	1 not at all	1 never	1 never	3	3	3	3	4	2	2	2	2	4	4	3	3	3	4	3	2	4	3	2	5	4	2	1	5	3	5	4	3
2024/01/27 10:43:36 PM CET	Nurse	Female	Intensive care medicine	16-20	manager	41-45	Married/in a relationship	2-3 times per week	2	3	1 never	1 never	4	4	4	3	3	3	3	5 totally true	4	4	3	3	4	3	3	3	3	4	4	1	5	3	3	3	5	4	5	3	5
2024/01/27 10:43:37 PM CET	Nurse	Female	Surgery	> 20	Worker	>60	Married/in a relationship	2-3 times per week	3	1 not at all	4 often	3 sometimes	2	3	3	3	2	1 not at all true	1 not at all true	1 not at all true	1 not at all true	2	4	3	4	3	3	3	1	2	3	1	5	1	4	3	4	1	5	2	3
2024/01/28 12:43:03 AM CET	Nurse	Female	Intensive care medicine	11-15	manager	41-45	Single	more than 5 times per week	2	2	1 never	1 never	3	3	2	3	4	3	2	2	2	3	3	2	4	4	4	2	2	2	2	3	5	1	1	2	3	3	4	3	4
2024/01/28 1:22:31 AM CET	Nurse	Female	Intensive care medicine	> 20	manager	46-50	Married/in a relationship	2-3 times per week	3	2	2 seldom	1 never	4	4	4	4	4	4	4	4	4	4	2	4	4	3	3	3	3	3	2	3	4	2	3	1	5	2	5	2	2
2024/01/28 1:39:59 AM CET	Nurse	Female	Internal medicine	11-15	Worker	35-40	Married/in a relationship	0-1 times per week	1 not at all	1 not at all	1 never	1 never	4	4	4	4	3	1 not at all true	1 not at all true	2	1 not at all true	3	3	4	4	3	2	2	3	2	3	3	3	2	3	5	4	4	4	3	2
2024/01/28 4:13:50 AM CET	Nurse	Female	Surgery-ORL-Surgery vascolare	0-5	Worker	31-35	Single	4-5 times per week	3	1 not at all	3 sometimes	3 sometimes	4	4	5 totally	4	3	2	1 not at all true	1 not at all true	2	3	3	3	3	2	3	3	4	3	3	5	4	2	3	3	1	3	4	3	2
2024/01/28 7:21:44 AM CET	Nurse	Female	Cure palliative	11-15	Worker	35-40	Married/in a relationship	2-3 times per week	2	2	3 sometimes	3 sometimes	4	4	5 totally	3	3	3	3	3	3	4	4	4	4	4	4	3	4	4	4	4	5	3	4	1	4	1	4	2	5
2024/01/28 11:20:53 AM CET	Nurse	Female	Internal medicine	> 20	nurse	46-50	Single	2-3 times per week	4	1 not at all	5 very often	5 very often	5 totally	3	4	2	4	4	2	2	2	4	3	4	4	3	3	4	4	4	3	5	5	1	5	1	3	1	4	1	5
2024/01/28 1:45:51 PM CET	Nurse	Female	Internal medicine	> 20	Worker	46-50	Married/in a relationship	2-3 times per week	4	2	2 seldom	1 never	5 totally	5 totally	5 totally	3	5 totally	3	4	1 not at all true	3	4	4	4	4	4	4	4	4	4	4	4	5	1	4	3	3	2	4	4	3
2024/01/28 1:48:40 PM CET	Nurse	Female	Internal medicine	0-5	Worker	26-30	Single	0-1 times per week	3	1 not at all	3 sometimes	3 sometimes	5 totally	4	5 totally	2	2	2	2	1 not at all true	2	3	3	3	4	3	3	4	3	3	4	5	5	4	5	3	1	4	4	5	5
2024/01/28 9:20:32 PM CET	Nurse	Female	Surgery	> 20	Worker	51-55	Single	0-1 times per week	1 not at all	2	1 never	1 never	3	4	4	3	3	3	2	3	3	2	4	2	4	2	2	4	4	4	4	3	5	2	4	2	3	4	4	3	5
2024/01/28 9:21:35 PM CET	Nurse	Female	Intensive care medicine	> 20	manager	56-60	Single	0-1 times per week	3	4	2 seldom	1 never	4	4	4	4	4	3	5 totally true	2	3	3	3	2	3	4	3	3	2	3	2	4	4	3	3	5	4	4	4	4	5
2024/01/28 9:26:33 PM CET	Nurse	Female	Administration	> 20	executive	51-55	Married/in a relationship	2-3 times per week	5 totally	5 totally	5 very often	5 very often	3	2	3	3	3	4	2	2	2	3	4	3	4	4	2	3	3	3	4	3	5	1	3	1	4	2	4	2	3
2024/01/28 9:42:27 PM CET	Physician	Female	Surgery	0-5	Worker	26-30	Single	2-3 times per week	3	4	1 never	1 never	4	4	3	3	3	2	2	2	3	4	3	3	3	3	3	3	3	3	3	4	4	1	4	1	3	2	4	2	3
2024/01/28 10:21:57 PM CET	Technician	Female	Services	6-10	Worker	26-30	Married/in a relationship	2-3 times per week	4	2	4 often	1 never	4	4	5 totally	4	4	2	1 not at all true	1 not at all true	1 not at all true	4	4	3	4	3	2	1	1	4	4	3	5	4	4	2	4	3	4	2	5
2024/01/28 11:33:35 PM CET	levatrice	Female	Surgery e ostetricia	6-10	impiegata come levatrice	26-30	Married/in a relationship	0-1 times per week	2	1 not at all	1 never	1 never	5 totally	4	4	4	2	2	2	3	2	4	3	3	4	4	4	4	3	4	4	2	5	1	3	3	5	1	4	1	4
2024/01/29 8:41:09 AM CET	Nurse	Female	Surgery	6-10	Worker	26-30	Married/in a relationship	0-1 times per week	2	1 not at all	2 seldom	2 seldom	3	3	3	2	2	1 not at all true	1 not at all true	2	2	3	3	2	3	2	2	2	2	3	3	3	4	3	2	2	4	2	4	2	4
2024/01/29 8:52:34 AM CET	Nurse	Female	Surgery	11-15	manager	31-35	Single	2-3 times per week	3	2	2 seldom	1 never	4	3	4	4	4	3	1 not at all true	3	3	3	3	3	4	3	4	4	4	4	3	3	5	1	4	2	4	2	5	4	4
2024/01/29 9:57:35 AM CET	Technician	Female	Services	> 20	Executive	51-55	Married/in a relationship	0-1 times per week	3	1 not at all	3 sometimes	3 sometimes	4	4	4	4	3	3	3	1 not at all true	1 not at all true	3	3	2	4	4	3	3	2	3	3	1	5	1	4	3	5	3	5	4	4
2024/01/29 10:01:21 AM CET	Physician	Female	Services	11-15	CC	35-40	Married/in a relationship	0-1 times per week	2	1 not at all	1 never	1 never	3	3	3	3	4	3	3	3	3	4	3	3	4	3	3	4	4	4	4	4	5	3	4	2	4	2	5	2	4
2024/01/29 10:51:23 AM CET	Physician	Male	Internal medicine	> 20	Executive	>60	Married/in a relationship	0-1 times per week	4	1 not at all	1 never	3 sometimes	5 totally	5 totally	5 totally	5 totally	5 totally	5 totally true	5 totally true	5 totally true	5 totally true	4	4	4	4	4	4	4	4	4	4	3	5	1	5	2	5	3	5	1	5
2024/01/29 11:01:12 AM CET	Nurse	Male	Intensive care medicine	> 20	manager	56-60	Single	2-3 times per week	5 totally	2	2 seldom	1 never	5 totally	5 totally	5 totally	5 totally	5 totally	4	5 totally true	5 totally true	5 totally true	4	3	3	4	3	4	3	4	4	3	5	5	1	5	1	5	2	5	1	3
2024/01/29 11:02:41 AM CET	Administrative sector worker	Female	Internal medicine	0-5	Worker	35-40	Single	2-3 times per week	3	2	1 never	1 never	4	3	3	3	3	2	2	2	3	3	4	2	3	2	4	2	2	3	2	3	5	1	3	3	4	3	5	3	3
2024/01/29 11:16:51 AM CET	Physician	Male	Emergency medicine	> 20	manager	41-45	Married/in a relationship	0-1 times per week	1 not at all	1 not at all	1 never	1 never	4	4	4	4	2	4	4	4	4	4	4	2	3	4	4	4	4	4	4	4	5	1	4	5	5	4	4	1	2
2024/01/29 12:29:26 PM CET	Nurse	Female	Cure palliative	> 20	manager	>60	Married/in a relationship	2-3 times per week	3	1 not at all	3 sometimes	2 seldom	4	4	4	3	4	4	4	4	4	3	3	2	4	3	3	3	2	4	3	4	5	4	4	3	2	4	4	4	4
2024/01/29 1:10:05 PM CET	Nurse	Female	Anaesthesia	0-5	Worker	31-35	Married/in a relationship	more than 5 times per week	5 totally	1 not at all	1 never	1 never	4	3	4	4	1 not at all	5 totally true	4	1 not at all true	2	3	4	2	2	3	4	3	3	4	4	3	4	3	2	5	4	2	4	4	5
2024/01/29 1:31:43 PM CET	Administrative sector worker	Female	Emergency medicine	0-5	Worker	41-45	Married/in a relationship	more than 5 times per week	5 totally	1 not at all	5 very often	5 very often	5 totally	5 totally	5 totally	5 totally	5 totally	1 not at all true	1 not at all true	1 not at all true	1 not at all true	4	4	4	4	2	3	4	2	4	3	5	5	2	3	1	5	5	5	1	1
2024/01/29 1:35:20 PM CET	Nurse	Female	Emergency medicine	> 20	manager	56-60	Single	0-1 times per week	4	3	1 never	1 never	4	3	3	3	4	2	4	2	1 not at all true	4	4	3	4	4	3	4	4	4	3	3	5	2	4	3	4	4	5	3	4
2024/01/29 1:54:11 PM CET	Technician	Female	Outpatient	11-15	Worker	31-35	Single	0-1 times per week	3	3	1 never	1 never	3	2	2	1 not at all	3	1 not at all true	1 not at all true	1 not at all true	1 not at all true	3	3	2	3	2	4	3	2	3	3	5	5	1	3	5	5	1	4	3	2
2024/01/29 1:54:53 PM CET	Nurse	Female	Intensive care medicine	> 20	manager	>60	Married/in a relationship	4-5 times per week	4	4	5 very often	1 never	4	4	4	4	3	4	3	3	4	4	4	3	4	4	4	3	0	3	4	4	5	1	4	1	3	2	5	3	3
2024/01/29 2:43:43 PM CET	Physician	Female	Internal medicine	11-15	Executive	41-45	Married/in a relationship	0-1 times per week	2	5 totally	1 never	1 never	4	4	4	4	3	3	4	4	3	4	3	3	3	2	3	3	3	3	4	5	5	2	2	1	1	2	4	1	4
2024/01/29 3:14:45 PM CET	Physician	Male	Surgery	6-10	Sostituto manager	35-40	Married/in a relationship	0-1 times per week	3	2	1 never	1 never	4	4	4	4	3	3	3	4	3	4	4	3	4	4	4	4	4	4	3	4	5	3	4	2	5	3	5	2	4
2024/01/29 5:20:05 PM CET	Physician	Female	Internal medicine	16-20	manager	41-45	Married/in a relationship	0-1 times per week	2	3	1 never	1 never	4	4	3	3	2	4	3	4	3	4	4	3	3	3	3	3	3	3	3	4	5	3	3	3	3	2	4	2	3
2024/01/30 8:18:18 AM CET	Administrative sector worker	Female	Outpatient	6-10	Worker	35-40	Married/in a relationship	0-1 times per week	4	1 not at all	3 sometimes	1 never	4	4	4	3	3	3	3	3	4	4	3	3	4	3	4	4	3	4	3	1	5	3	3	1	5	3	5	3	5
2024/01/30 8:39:49 AM CET	Nurse	Female	Internal medicine	> 20	executive	41-45	Married/in a relationship	2-3 times per week	3	3	1 never	1 never	4	4	5 totally	5 totally	3	3	3	4	4	3	3	1	2	3	2	3	2	3	3	3	4	2	3	4	5	3	4	2	4
2024/01/30 9:31:15 AM CET	Nurse	Female	Internal medicineenterologia	16-20	Worker	41-45	Married/in a relationship	0-1 times per week	2	1 not at all	1 never	1 never	5 totally	3	5 totally	4	4	2	2	2	2	3	3	3	2	2	2	3	1	2	1	2	5	2	4	4	4	3	4	3	4
2024/01/30 11:31:07 AM CET	Physician	Female	Anaesthesia	> 20	executive	46-50	Married/in a relationship	0-1 times per week	5 totally	1 not at all	1 never	1 never	5 totally	5 totally	5 totally	4	4	4	3	3	3	4	4	4	4	4	4	4	4	4	3	5	5	1	5	5	3	3	5	4	4
2024/01/30 11:31:26 AM CET	Nurse	Female	Outpatient	> 20	Worker	51-55	Single	0-1 times per week	5 totally	1 not at all	1 never	1 never	4	3	3	3	5 totally	5 totally true	4	5 totally true	3	4	4	4	4	3	3	3	2	3	3	4	5	3	4	4	5	3	5	3	5
2024/01/30 11:31:56 AM CET	Technician	Female	Technical sector	0-5	Worker	35-40	Married/in a relationship	4-5 times per week	4	1 not at all	5 very often	5 very often	4	4	5 totally	5 totally	5 totally	3	3	4	5 totally true	4	3	2	3	2	2	3	2	3	3	3	5	2	2	1	4	2	4	2	4
2024/01/30 11:32:07 AM CET	Administrative sector worker	Female	Administration	6-10	Worker	31-35	Single	2-3 times per week	2	2	3 sometimes	3 sometimes	4	3	4	3	3	3	3	3	3	2	3	3	3	3	3	3	3	3	3	5	5	1	5	3	4	1	4	1	3
2024/01/30 11:32:07 AM CET	Physician	Male	Surgery	6-10	manager	31-35	Married/in a relationship	0-1 times per week	4	2	1 never	1 never	4	4	4	4	3	4	4	3	3	4	4	3	4	4	3	3	4	4	4	4	5	3	3	5	3	2	4	1	4
2024/01/30 11:32:08 AM CET	Physician	Male	Services	6-10	manager	31-35	Married/in a relationship	0-1 times per week	2	1 not at all	1 never	1 never	3	3	3	2	2	2	1 not at all true	2	2	4	4	2	3	2	4	3	4	3	2	5	5	2	2	3	3	4	4	3	4
2024/01/30 11:32:38 AM CET	Physician	Female	Internal medicine	0-5	Worker	26-30	Married/in a relationship	2-3 times per week	2	2	1 never	1 never	3	3	4	3	2	3	3	3	2	4	4	4	4	3	4	2	2	4	3	5	5	3	4	1	3	2	4	3	3
2024/01/30 11:32:48 AM CET	Physician	Male	Intensive care medicine	11-15	Executive	46-50	Married/in a relationship	2-3 times per week	3	1 not at all	2 seldom	1 never	4	4	5 totally	3	4	5 totally true	5 totally true	4	4	4	3	4	4	3	0	4	3	0	4	5	5	5	5	2	5	2	1	1	5
2024/01/30 11:33:02 AM CET	Physician	Male	Internal medicine	6-10	Worker	31-35	Single	0-1 times per week	2	2	3 sometimes	2 seldom	3	3	3	2	1 not at all	2	1 not at all true	1 not at all true	1 not at all true	3	3	3	3	3	3	3	3	3	3	5	5	5	4	4	3	2	3	1	5
2024/01/30 11:33:08 AM CET	Psicologo	Male	Internal medicine	6-10	Psicologo	31-35	Single	0-1 times per week	3	3	1 never	1 never	5 totally	4	5 totally	4	4	4	4	3	2	2	2	3	3	2	2	3	3	3	3	5	5	3	4	2	2	3	4	2	3
2024/01/30 11:33:10 AM CET	Administrative sector worker	Female	Intensive care medicine	> 20	Worker	41-45	Single	2-3 times per week	4	4	4 often	1 never	5 totally	5 totally	5 totally	3	3	3	3	3	3	2	1	1	1	1	1	2	2	3	2	5	5	1	3	3	5	1	5	3	4
2024/01/30 11:33:13 AM CET	Administrative sector worker	Female	Services	0-5	Worker	18-25	Married/in a relationship	0-1 times per week	3	1 not at all	1 never	1 never	5 totally	5 totally	5 totally	4	4	5 totally true	5 totally true	5 totally true	5 totally true	4	3	3	4	3	3	4	2	4	3	2	5	3	3	1	3	1	5	4	3
2024/01/30 11:33:26 AM CET	Nurse	Female	Internal medicine	0-5	Worker	18-25	Single	0-1 times per week	3	1 not at all	2 seldom	2 seldom	3	3	2	2	3	3	3	2	2	3	2	2	3	2	3	3	2	3	3	3	5	3	4	3	4	2	4	3	4
2024/01/30 11:33:32 AM CET	segretaria	Female	Outpatient	0-5	Worker	35-40	Married/in a relationship	0-1 times per week	2	1 not at all	2 seldom	1 never	3	4	4	3	3	1 not at all true	1 not at all true	2	2	4	3	2	2	3	3	2	2	2	2	2	4	1	3	1	5	2	3	2	5
2024/01/30 11:33:43 AM CET	Administrative sector worker	Female	Administration	> 20	Worker	56-60	Married/in a relationship	4-5 times per week	3	3	1 never	1 never	5 totally	2	3	4	5 totally	2	2	4	3	3	2	2	2	3	4	4	4	4	4	4	5	1	4	3	4	4	5	3	3
2024/01/30 11:33:43 AM CET	Physician	Female	Internal medicine	6-10	Executive	31-35	Married/in a relationship	more than 5 times per week	4	5 totally	4 often	4 often	5 totally	5 totally	5 totally	4	4	4	3	5 totally true	5 totally true	4	4	4	4	4	4	4	3	4	3	3	5	3	4	4	4	4	5	3	4
2024/01/30 11:33:49 AM CET	Physician	Male	radioterapia	11-15	Executive	41-45	Married/in a relationship	0-1 times per week	2	3	1 never	1 never	2	2	2	2	2	3	2	3	1 not at all true	3	2	2	1	2	2	2	2	2	3	4	5	1	4	1	2	2	5	1	3
2024/01/30 11:33:50 AM CET	Physician	Female	Surgery	11-15	Manager	41-45	Married/in a relationship	0-1 times per week	2	1 not at all	1 never	1 never	5 totally	5 totally	5 totally	5 totally	4	4	4	4	4	4	4	2	4	3	4	4	4	4	3	3	5	2	4	5	4	3	4	3	3
2024/01/30 11:34:35 AM CET	Physician	Female	Surgery	0-5	Worker	26-30	Single	0-1 times per week	1 not at all	2	1 never	1 never	2	1 not at all	1 not at all	4	1 not at all	2	2	1 not at all true	1 not at all true	4	3	2	3	4	4	3	1	2	3	5	5	2	1	1	4	3	4	3	5
2024/01/30 11:34:44 AM CET	Administrative sector worker	Female	Internal medicine	0-5	Worker	26-30	Married/in a relationship	0-1 times per week	1 not at all	3	1 never	1 never	3	3	3	3	3	2	2	3	2	4	3	2	3	4	4	4	2	3	2	4	5	1	4	4	5	2	4	3	1
2024/01/30 11:34:49 AM CET	Administrative sector worker	Female	Anaesthesia	11-15	Worker	31-35	Married/in a relationship	2-3 times per week	4	5 totally	4 often	1 never	4	4	4	3	3	3	3	2	3	4	3	2	4	2	3	4	4	4	3	4	4	2	4	1	4	3	4	3	5
2024/01/30 11:34:52 AM CET	Administrative sector worker	Female	Outpatient	0-5	Worker	51-55	Married/in a relationship	0-1 times per week	4	3	5 very often	1 never	5 totally	5 totally	5 totally	4	4	5 totally true	5 totally true	5 totally true	5 totally true	3	3	3	1	2	4	3	3	4	2	5	5	3	3	1	1	1	3	4	5
2024/01/30 11:34:53 AM CET	Administrative sector worker	Female	Surgery	16-20	Worker	35-40	Married/in a relationship	0-1 times per week	3	2	1 never	1 never	4	4	4	4	3	3	2	2	2	4	3	3	2	4	4	3	3	3	3	3	5	1	4	2	5	3	5	2	5
2024/01/30 11:34:54 AM CET	Administrative sector worker	Female	risorse umana	11-15	assistente ru	46-50	Married/in a relationship	0-1 times per week	3	4	2 seldom	1 never	5 totally	5 totally	5 totally	3	4	3	4	4	5 totally true	4	4	3	3	4	3	3	3	4	4	5	5	3	4	1	5	1	4	1	5
2024/01/30 11:34:54 AM CET	Nurse	Female	Direzione	16-20	Executive	46-50	Married/in a relationship	4-5 times per week	4	3	3 sometimes	3 sometimes	5 totally	5 totally	5 totally	3	4	4	4	3	4	4	2	3	4	3	4	3	4	4	3	4	4	2	4	1	4	3	4	3	4
2024/01/30 11:34:55 AM CET	Administrative sector worker	Female	Administration	> 20	Manager	56-60	Single	2-3 times per week	3	2	3 sometimes	1 never	5 totally	5 totally	5 totally	4	3	2	2	2	3	3	3	3	4	2	3	3	3	4	4	3	5	3	4	2	4	1	4	2	4
2024/01/30 11:35:00 AM CET	Physician	Male	Cardiologia	0-5	Executive	35-40	Married/in a relationship	0-1 times per week	2	1 not at all	1 never	1 never	3	3	3	3	1 not at all	4	4	2	2	3	4	2	2	3	2	2	2	3	2	4	4	3	1	3	3	3	4	2	3
2024/01/30 11:35:08 AM CET	Nurse	Male	Internal medicine	11-15	manager	31-35	Married/in a relationship	2-3 times per week	2	5 totally	1 never	1 never	4	4	4	3	3	3	2	1 not at all true	1 not at all true	3	3	3	3	3	3	3	3	3	3	5	5	2	5	4	5	5	5	5	5
2024/01/30 11:35:10 AM CET	Physician	Male	Neurosurgery	0-5	Worker	26-30	Married/in a relationship	2-3 times per week	3	4	3 sometimes	2 seldom	4	4	4	4	4	4	4	4	4	3	3	2	3	3	4	4	3	4	4	3	5	2	4	3	5	3	4	4	3
2024/01/30 11:35:23 AM CET	Trm	Female	Services	> 20	manager	46-50	Married/in a relationship	2-3 times per week	3	1 not at all	4 often	3 sometimes	4	3	4	4	4	2	2	2	2	4	4	4	2	4	4	4	4	4	2	1	5	3	5	2	5	3	3	3	5
2024/01/30 11:35:34 AM CET	Administrative sector worker	Female	Surgery e ostetricia	16-20	Worker	41-45	Married/in a relationship	2-3 times per week	2	2	3 sometimes	1 never	5 totally	4	5 totally	5 totally	5 totally	4	3	4	4	3	2	3	4	2	3	3	1	4	3	3	4	2	4	1	5	1	4	1	4
2024/01/30 11:35:34 AM CET	Technician	Male	Tecnical sector	0-5	Tecnico	46-50	Single	0-1 times per week	3	4	1 never	2 seldom	4	3	3	3	3	2	1 not at all true	3	3	3	3	3	2	3	3	3	3	3	2	4	5	2	4	2	2	2	4	2	4
2024/01/30 11:35:50 AM CET	Segretariato physician	Female	Administration	0-5	Worker	26-30	Single	0-1 times per week	3	3	3 sometimes	3 sometimes	4	3	3	3	2	2	2	1 not at all true	2	2	2	4	3	2	2	3	1	1	2	5	4	4	4	1	4	4	3	2	5
2024/01/30 11:36:04 AM CET	Physician	Female	Internal medicine	0-5	Worker	31-35	Married/in a relationship	0-1 times per week	2	2	1 never	1 never	4	3	4	4	3	5 totally true	4	3	3	3	4	2	4	4	4	4	3	4	4	3	5	1	3	1	3	2	4	4	5
2024/01/30 11:36:22 AM CET	Physician	Female	Surgery e ostetricia	> 20	Physician aggiunto	51-55	Married/in a relationship	2-3 times per week	3	1 not at all	4 often	1 never	3	3	4	5 totally	5 totally	4	4	2	2	4	3	4	4	4	4	4	3	4	4	2	5	4	5	1	4	3	5	4	4
2024/01/30 11:36:25 AM CET	Administrative sector worker	Female	Anaesthesia	0-5	Worker	31-35	Married/in a relationship	0-1 times per week	1 not at all	2	1 never	1 never	5 totally	4	5 totally	3	4	5 totally true	5 totally true	5 totally true	5 totally true	4	2	2	4	3	4	4	3	4	3	5	5	1	3	1	2	3	5	2	4
2024/01/30 11:36:44 AM CET	Administrative sector worker	Female	Outpatient	11-15	Worker	51-55	Married/in a relationship	0-1 times per week	2	1 not at all	2 seldom	1 never	4	4	4	3	3	2	2	3	3	4	3	3	4	3	3	4	3	3	3	5	5	4	4	1	4	2	4	2	4
2024/01/30 11:37:14 AM CET	Dietista	Female	Serviceso dietetico	0-5	dietista	26-30	Married/in a relationship	4-5 times per week	4	3	2 seldom	2 seldom	4	4	4	3	4	3	3	3	4	4	3	3	4	3	4	3	3	3	3	5	5	1	3	3	4	2	4	2	3
2024/01/30 11:37:37 AM CET	Administrative sector worker	Female	Surgery	6-10	Worker	26-30	Married/in a relationship	0-1 times per week	3	4	1 never	1 never	4	3	5 totally	3	4	1 not at all true	1 not at all true	1 not at all true	4	4	3	3	4	4	3	3	4	4	3	1	5	1	2	3	5	3	5	2	3
2024/01/30 11:37:45 AM CET	Administrative sector worker	Female	Administration	> 20	Worker	46-50	Married/in a relationship	2-3 times per week	4	2	2 seldom	2 seldom	4	4	4	4	4	3	3	4	4	3	3	3	3	3	3	4	4	3	3	5	5	2	4	2	4	3	4	2	4
2024/01/30 11:37:48 AM CET	Administrative sector worker	Female	Surgery	11-15	Worker	35-40	Married/in a relationship	0-1 times per week	4	1 not at all	1 never	1 never	4	5 totally	5 totally	5 totally	5 totally	4	4	3	3	3	3	4	2	2	2	2	1	2	3	3	5	3	3	3	5	3	5	3	3
2024/01/30 11:37:56 AM CET	Hospitality staff	Female	Hospitality	6-10	Worker	41-45	Married/in a relationship	0-1 times per week	2	4	1 never	1 never	4	3	4	3	4	1 not at all true	1 not at all true	1 not at all true	1 not at all true	4	2	2	4	2	4	2	2	4	2	3	4	2	4	5	3	3	4	4	3
2024/01/30 11:38:09 AM CET	Nurse	Female	Cure palliative	16-20	executive	35-40	Married/in a relationship	0-1 times per week	3	1 not at all	3 sometimes	3 sometimes	4	4	4	4	3	4	4	4	4	4	4	3	3	3	4	3	1	4	3	4	5	2	2	3	4	3	5	3	5
2024/01/30 11:38:10 AM CET	Administrative sector worker	Female	Administration	0-5	Worker	26-30	Single	0-1 times per week	3	5 totally	1 never	1 never	4	4	3	2	4	1 not at all true	1 not at all true	4	2	4	3	3	3	4	3	2	3	3	3	3	4	3	4	3	4	2	3	3	3
2024/01/30 11:38:12 AM CET	Administrative sector worker	Female	Internal medicine	6-10	Manager	41-45	Married/in a relationship	0-1 times per week	3	3	1 never	1 never	3	3	4	2	4	4	4	4	4	4	3	1	3	3	2	2	1	2	2	3	4	2	5	4	3	2	3	1	3
2024/01/30 11:38:37 AM CET	Technician	Male	Technical sector	6-10	Manager	35-40	Married/in a relationship	2-3 times per week	3	1 not at all	1 never	1 never	3	3	3	3	3	3	3	2	2	3	3	2	3	3	3	3	2	3	3	4	5	1	4	3	3	3	5	2	3
2024/01/30 11:39:04 AM CET	Technician	Male	Tecnical sector	6-10	Worker	41-45	Married/in a relationship	0-1 times per week	4	1 not at all	1 never	1 never	2	1 not at all	4	4	1 not at all	1 not at all true	1 not at all true	3	1 not at all true	4	4	3	4	3	4	3	3	4	4	3	5	4	2	5	3	3	4	5	3
2024/01/30 11:39:23 AM CET	Nurse	Female	Internal medicine	6-10	Worker	31-35	Married/in a relationship	0-1 times per week	3	3	1 never	1 never	4	4	5 totally	3	3	3	4	2	2	3	3	1	4	3	3	3	2	4	2	5	5	5	4	5	3	3	4	5	2
2024/01/30 11:39:59 AM CET	Administrative sector worker	Male	Administration	0-5	Worker	41-45	Married/in a relationship	2-3 times per week	4	1 not at all	5 very often	4 often	5 totally	4	5 totally	5 totally	4	2	2	3	2	4	4	3	4	3	3	3	3	3	4	4	4	2	4	1	5	2	4	2	4
2024/01/30 11:40:00 AM CET	Administrative sector worker	Female	serviceso sociale	16-20	Worker	35-40	Married/in a relationship	2-3 times per week	3	1 not at all	2 seldom	2 seldom	4	4	5 totally	4	2	3	3	2	3	3	3	2	2	2	3	3	2	3	2	2	5	3	2	2	5	3	4	5	4
2024/01/30 11:40:36 AM CET	Nurse	Male	Anaesthesia	6-10	manager	31-35	Married/in a relationship	2-3 times per week	3	1 not at all	1 never	1 never	3	3	4	4	3	4	4	2	1 not at all true	3	3	3	3	4	3	3	2	4	2	5	5	1	3	5	4	4	5	5	3
2024/01/30 11:41:08 AM CET	Nurse	Female	Surgery	11-15	Worker	35-40	Single	0-1 times per week	4	3	1 never	3 sometimes	3	2	4	4	4	3	3	3	3	4	4	4	3	4	4	4	4	4	4	5	5	3	5	2	4	1	5	2	5
2024/01/30 11:41:34 AM CET	Physician	Male	Surgery	0-5	Worker	31-35	Married/in a relationship	0-1 times per week	1 not at all	1 not at all	1 never	1 never	4	4	4	4	2	3	3	2	1 not at all true	3	3	2	4	2	3	3	1	2	2	3	5	3	2	3	5	2	5	4	3
2024/01/30 11:41:37 AM CET	Nurse	Female	Intensive care medicine	16-20	manager	41-45	Married/in a relationship	0-1 times per week	2	1 not at all	1 never	1 never	3	3	3	2	2	2	3	2	2	3	2	2	3	3	2	3	2	3	3	2	4	3	3	4	4	3	5	4	3
2024/01/30 11:42:10 AM CET	Administrative sector worker	Female	Anaesthesia	11-15	Worker	41-45	Single	0-1 times per week	3	2	2 seldom	2 seldom	3	4	3	4	4	4	3	4	3	3	3	2	4	4	3	4	4	3	4	3	5	4	4	3	3	1	5	3	2
2024/01/30 11:42:17 AM CET	Administrative sector worker	Male	Administration	> 20	Manager	56-60	Married/in a relationship	0-1 times per week	4	1 not at all	1 never	1 never	4	4	5 totally	5 totally	4	4	3	5 totally true	5 totally true	3	3	4	4	4	4	4	3	3	3	4	5	2	4	5	4	2	5	3	4
2024/01/30 11:42:55 AM CET	Nurse	Female	Onco-internal medicine outpatiento	> 20	manager	51-55	Married/in a relationship	2-3 times per week	3	4	4 often	4 often	5 totally	4	5 totally	4	3	4	3	3	3	4	3	3	3	2	3	3	3	2	2	4	4	2	4	3	4	2	4	2	4
2024/01/30 11:42:59 AM CET	Administrative sector worker	Female	Services	> 20	Worker	56-60	Married/in a relationship	0-1 times per week	4	2	1 never	1 never	4	4	4	5 totally	4	3	3	4	3	3	3	2	3	2	3	3	4	4	3	4	4	1	3	1	5	1	5	2	4
2024/01/30 11:43:00 AM CET	Technician	Female	Farmacia/farmaccologia	6-10	risorsa operativa	31-35	Married/in a relationship	0-1 times per week	5 totally	5 totally	2 seldom	2 seldom	4	2	3	3	5 totally	5 totally true	1 not at all true	2	1 not at all true	3	3	2	4	3	3	3	3	4	3	3	4	2	2	1	2	3	5	3	4
2024/01/30 11:43:13 AM CET	Nurse	Female	Outpatient	11-15	manager	31-35	Married/in a relationship	0-1 times per week	4	3	1 never	1 never	4	4	5 totally	5 totally	1 not at all	2	2	1 not at all true	1 not at all true	4	3	0	2	2	4	0	0	1	1	5	5	4	5	5	4	1	5	4	3
2024/01/30 11:43:20 AM CET	Administrative sector worker	Female	Administration	16-20	Worker	56-60	Single	2-3 times per week	2	2	1 never	1 never	5 totally	5 totally	5 totally	5 totally	5 totally	3	3	4	4	4	4	4	4	4	4	4	3	4	3	5	5	1	2	1	5	1	5	2	5
2024/01/30 11:43:27 AM CET	Administrative sector worker	Female	Services	> 20	Worker	51-55	Married/in a relationship	2-3 times per week	3	3	3 sometimes	1 never	4	3	3	2	3	4	4	1 not at all true	3	1	1	0	1	0	3	2	2	3	3	4	5	1	3	5	4	4	5	4	4
2024/01/30 11:44:04 AM CET	Technician	Female	Internal medicine	> 20	worker	41-45	Married/in a relationship	0-1 times per week	4	3	1 never	1 never	3	3	3	3	3	1 not at all true	2	2	1 not at all true	4	4	3	4	4	3	3	3	3	3	4	5	1	4	3	4	1	4	1	4
2024/01/30 11:44:25 AM CET	Nurse	Female	Intensive care medicine	6-10	manager	31-35	Married/in a relationship	0-1 times per week	3	2	2 seldom	1 never	5 totally	4	5 totally	4	3	3	3	4	5 totally true	4	3	4	3	3	4	3	3	4	4	3	5	3	4	3	5	3	5	3	4
2024/01/30 11:44:30 AM CET	Nurse	Female	Internal medicine	0-5	Worker	26-30	Single	0-1 times per week	4	1 not at all	1 never	1 never	3	3	3	2	3	3	2	3	4	2	3	2	3	2	2	3	2	2	3	4	4	3	3	5	3	2	4	3	2
2024/01/30 11:44:57 AM CET	Nurse	Female	Surgery	6-10	Worker	31-35	Single	0-1 times per week	2	2	2 seldom	1 never	3	3	3	2	2	2	1 not at all true	2	2	4	3	3	4	3	3	2	3	3	2	4	5	2	2	3	4	2	5	3	3
2024/01/30 11:44:58 AM CET	Physician	Male	Surgery vascolare	16-20	Executive	41-45	Married/in a relationship	0-1 times per week	3	1 not at all	1 never	3 sometimes	5 totally	4	5 totally	4	2	4	4	4	4	4	4	2	3	4	3	4	4	4	4	2	5	3	3	2	5	3	5	5	5
2024/01/30 11:45:28 AM CET	Administrative sector worker	Female	Administration	6-10	Worker	56-60	Married/in a relationship	0-1 times per week	3	1 not at all	2 seldom	1 never	4	4	4	4	2	2	2	2	2	3	3	3	3	3	3	3	3	3	3	4	5	1	4	1	5	2	5	1	4
2024/01/30 11:45:47 AM CET	Administrative sector worker	Female	Surgery	> 20	Worker	>60	Married/in a relationship	0-1 times per week	2	1 not at all	2 seldom	2 seldom	5 totally	5 totally	5 totally	5 totally	5 totally	5 totally true	5 totally true	5 totally true	5 totally true	3	3	3	2	3	2	3	3	2	3	3	5	2	2	2	3	1	4	1	3
2024/01/30 11:45:52 AM CET	Nurse	Female	Neurosurgery	6-10	Worker	26-30	Single	0-1 times per week	3	1 not at all	1 never	1 never	4	4	4	3	2	2	2	3	2	3	3	3	2	2	2	3	2	2	2	5	4	4	4	4	2	2	4	2	2
2024/01/30 11:46:00 AM CET	Administrative sector worker	Female	IOSI	16-20	Worker	35-40	Married/in a relationship	0-1 times per week	4	2	3 sometimes	3 sometimes	3	3	3	2	4	3	1 not at all true	2	1 not at all true	3	4	2	4	2	2	3	3	3	2	4	5	3	3	1	3	4	5	3	3
2024/01/30 11:46:08 AM CET	Administrative sector worker	Male	Administration	0-5	Worker	18-25	Single	2-3 times per week	1 not at all	1 not at all	3 sometimes	1 never	5 totally	5 totally	5 totally	1 not at all	1 not at all	2	3	1 not at all true	1 not at all true	4	4	4	4	4	4	4	4	4	4	3	5	3	4	5	3	4	4	5	5
2024/01/30 11:46:59 AM CET	Administrative sector worker	Female	ricerca clinica in internal medicine	6-10	Worker	31-35	Single	0-1 times per week	3	1 not at all	3 sometimes	3 sometimes	2	2	2	3	5 totally	4	1 not at all true	1 not at all true	4	3	3	1	4	2	3	4	1	2	2	5	5	4	3	4	2	5	5	4	5
2024/01/30 11:47:14 AM CET	Administrative sector worker	Male	amministrazione	0-5	Worker	26-30	Single	more than 5 times per week	3	1 not at all	2 seldom	1 never	2	2	3	4	4	3	1 not at all true	4	1 not at all true	4	3	2	4	4	3	2	3	3	2	3	3	5	2	1	5	1	3	1	5
2024/01/30 11:47:39 AM CET	Administrative sector worker	Female	Internal medicine	6-10	Worker	31-35	Married/in a relationship	0-1 times per week	4	3	1 never	1 never	3	3	3	3	3	2	2	2	2	4	2	3	3	3	3	2	2	3	4	4	5	3	4	3	4	2	4	2	5
2024/01/30 11:48:06 AM CET	Nurse	Female	Outpatient	> 20	manager	56-60	Married/in a relationship	2-3 times per week	4	1 not at all	2 seldom	1 never	3	3	3	4	4	2	2	2	2	4	3	3	3	3	3	4	3	3	3	3	4	2	3	3	4	3	4	3	4
2024/01/30 11:48:44 AM CET	Administrative sector worker	Female	Internal medicine	0-5	Worker	26-30	Married/in a relationship	2-3 times per week	4	1 not at all	3 sometimes	1 never	4	2	5 totally	3	3	3	3	2	2	3	3	4	4	2	3	3	3	3	3	5	5	3	5	4	4	3	4	3	3
2024/01/30 11:48:52 AM CET	Technician	Female	Technical sector	6-10	Worker	26-30	Single	0-1 times per week	2	1 not at all	2 seldom	2 seldom	2	2	2	2	2	1 not at all true	2	1 not at all true	1 not at all true	3	3	3	3	3	3	3	3	3	3	3	4	2	3	3	4	1	5	2	3
2024/01/30 11:49:02 AM CET	Administrative sector worker	Female	Anaesthesia	6-10	Worker	26-30	Single	0-1 times per week	4	1 not at all	5 very often	5 very often	3	4	2	4	4	5 totally true	5 totally true	2	3	3	2	2	1	3	3	2	2	3	3	3	4	3	5	5	4	3	5	2	5
2024/01/30 11:49:05 AM CET	Physician	Male	Anaesthesia	16-20	manager	51-55	Married/in a relationship	2-3 times per week	3	1 not at all	1 never	1 never	3	3	4	5 totally	3	5 totally true	4	4	5 totally true	4	4	3	4	3	4	4	4	3	3	3	5	1	3	1	3	3	5	3	5
2024/01/30 11:50:18 AM CET	Caporeparto infermieristico	Male	Neurosurgery	16-20	executive	41-45	Married/in a relationship	2-3 times per week	3	3	3 sometimes	2 seldom	4	4	4	4	3	4	3	3	4	4	3	4	3	2	3	3	3	3	3	3	5	4	3	3	4	3	5	2	4
2024/01/30 11:50:23 AM CET	Physician	Female	i osi	0-5	physician	31-35	Married/in a relationship	2-3 times per week	3	3	1 never	1 never	3	3	3	4	3	4	3	3	3	3	2	2	3	3	2	2	2	3	3	4	4	3	3	3	3	2	4	2	3
2024/01/30 11:51:08 AM CET	Nurse	Male	Internal medicine	6-10	Worker	31-35	Single	0-1 times per week	2	4	3 sometimes	1 never	5 totally	3	4	4	2	3	2	2	3	4	3	4	4	4	3	3	2	2	4	3	4	2	5	1	5	2	3	2	5
2024/01/30 11:51:16 AM CET	Physician	Female	dinternal medicine	0-5	worker	31-35	Single	0-1 times per week	1 not at all	1 not at all	1 never	1 never	5 totally	5 totally	5 totally	5 totally	2	2	4	5 totally true	5 totally true	4	4	4	4	3	4	3	4	4	4	3	5	5	5	1	4	2	4	2	5
2024/01/30 11:51:38 AM CET	Administrative sector worker	Female	Administration	> 20	Worker	46-50	Single	2-3 times per week	4	3	1 never	1 never	5 totally	5 totally	5 totally	4	3	1 not at all true	2	1 not at all true	1 not at all true	4	4	4	4	4	4	4	4	4	4	4	5	1	4	4	4	1	5	1	4
2024/01/30 11:51:38 AM CET	Administrative sector worker	Male	Administration	0-5	Worker	35-40	Single	4-5 times per week	3	2	1 never	1 never	4	4	4	3	4	2	3	2	3	3	3	3	4	4	1	3	2	1	3	5	4	4	4	2	1	2	4	2	2
2024/01/30 11:51:58 AM CET	Physician	Female	Emergency medicine	0-5	Worker	31-35	Single	0-1 times per week	2	1 not at all	1 never	1 never	4	3	3	3	2	3	3	2	2	3	2	3	3	3	3	3	2	3	2	3	4	2	3	3	4	3	3	3	3
2024/01/30 11:52:04 AM CET	Physician	Male	Cure palliative	> 20	manager	>60	Married/in a relationship	0-1 times per week	5 totally	1 not at all	1 never	1 never	5 totally	4	4	3	4	5 totally true	5 totally true	5 totally true	5 totally true	4	3	1	4	4	2	3	2	2	3	3	4	4	4	3	5	2	3	4	3
2024/01/30 11:52:35 AM CET	Physician	Male	Emergency medicine	6-10	manager	31-35	Married/in a relationship	2-3 times per week	1 not at all	1 not at all	1 never	1 never	4	4	4	3	1 not at all	3	1 not at all true	2	1 not at all true	4	4	4	4	0	4	3	3	4	2	1	5	1	5	2	5	3	4	4	5
2024/01/30 11:52:39 AM CET	Physician	Male	Surgery	> 20	Executive	46-50	Married/in a relationship	2-3 times per week	2	4	1 never	1 never	4	4	4	4	1 not at all	3	3	5 totally true	4	4	4	4	4	4	4	4	4	4	4	5	5	2	5	2	1	2	4	2	5
2024/01/30 11:53:03 AM CET	Physician	Male	Anaesthesia	6-10	manager	35-40	Married/in a relationship	2-3 times per week	3	1 not at all	3 sometimes	1 never	2	2	3	3	1 not at all	3	3	2	1 not at all true	2	2	0	4	2	3	3	2	2	1	3	4	1	2	1	4	5	3	5	4
2024/01/30 11:53:13 AM CET	Assistente di farmacia	Female	Farmacia	> 20	Assistente di farmacia impiegata	41-45	Married/in a relationship	0-1 times per week	4	3	2 seldom	1 never	2	2	1 not at all	3	2	3	3	2	3	3	3	3	3	4	3	2	3	4	4	3	4	1	3	2	5	1	5	2	3
2024/01/30 11:53:41 AM CET	Administrative sector worker	Female	Administration	0-5	Worker	26-30	Single	2-3 times per week	2	5 totally	4 often	4 often	2	2	1 not at all	4	4	4	4	1 not at all true	1 not at all true	4	4	3	4	4	4	3	3	4	4	5	5	1	4	1	2	2	5	4	5
2024/01/30 11:54:20 AM CET	Physician	Female	Emergency medicine	0-5	Manager	31-35	Married/in a relationship	0-1 times per week	1 not at all	2	1 never	1 never	2	1 not at all	3	1 not at all	2	5 totally true	5 totally true	4	1 not at all true	4	4	4	4	4	3	4	4	4	4	4	5	1	5	4	3	2	5	1	2
2024/01/30 11:54:54 AM CET	Nurse	Female	Services	11-15	Infermiere	51-55	Married/in a relationship	2-3 times per week	5 totally	5 totally	3 sometimes	2 seldom	3	3	3	4	3	3	3	4	3	4	4	3	2	3	2	2	2	1	4	5	4	1	3	3	3	2	4	2	3
2024/01/30 11:55:09 AM CET	Nurse	Male	Emergency medicine	11-15	Worker	35-40	Married/in a relationship	0-1 times per week	3	3	1 never	1 never	4	3	4	2	3	2	2	3	2	3	3	4	3	3	2	3	3	3	3	3	4	2	4	4	4	2	4	1	3
2024/01/30 11:55:35 AM CET	Administrative sector worker	Female	Surgery	11-15	Worker	31-35	Married/in a relationship	2-3 times per week	3	2	3 sometimes	3 sometimes	3	3	3	4	2	1 not at all true	1 not at all true	1 not at all true	1 not at all true	3	3	4	2	2	3	2	3	3	3	4	5	2	4	1	5	1	4	1	5
2024/01/30 11:55:56 AM CET	Physician	Female	Intensive care medicine	11-15	Manager	35-40	Married/in a relationship	0-1 times per week	3	5 totally	1 never	1 never	5 totally	5 totally	5 totally	4	4	5 totally true	3	5 totally true	5 totally true	4	3	4	3	4	4	4	4	4	3	3	4	2	5	3	5	3	5	1	2
2024/01/30 11:56:14 AM CET	Physician	Female	internal medicine	6-10	Executive	35-40	Single	2-3 times per week	3	5 totally	2 seldom	4 often	4	4	4	5 totally	4	5 totally true	5 totally true	5 totally true	5 totally true	4	4	4	4	4	4	4	4	4	4	2	5	1	4	2	5	2	4	1	5
2024/01/30 11:56:24 AM CET	tecnico di services	Female	Services	> 20	Worker	41-45	Married/in a relationship	2-3 times per week	3	1 not at all	2 seldom	1 never	3	3	4	5 totally	5 totally	3	4	1 not at all true	1 not at all true	4	4	3	3	4	3	4	4	4	4	4	5	1	5	3	5	2	5	2	5
2024/01/30 11:58:36 AM CET	Technician	Male	Services	11-15	TRM	31-35	Married/in a relationship	2-3 times per week	2	1 not at all	1 never	1 never	4	3	4	3	2	1 not at all true	1 not at all true	1 not at all true	1 not at all true	4	2	4	3	2	2	4	3	3	3	4	5	1	4	1	4	3	5	4	5
2024/01/30 11:58:46 AM CET	Nurse	Female	Anaesthesia	> 20	manager	46-50	Single	2-3 times per week	3	5 totally	1 never	1 never	3	3	3	4	5 totally	4	3	4	4	4	3	3	3	3	3	4	3	3	3	4	4	3	4	4	4	3	4	5	5
2024/01/30 11:58:52 AM CET	Nurse	Male	radioterapia	16-20	manager	41-45	Married/in a relationship	2-3 times per week	2	1 not at all	1 never	1 never	5 totally	4	5 totally	4	2	2	5 totally true	4	2	3	3	2	4	3	3	3	3	3	3	5	4	2	5	3	4	1	5	1	4
2024/01/30 11:59:15 AM CET	Nurse	Female	services	0-5	Worker	35-40	Married/in a relationship	0-1 times per week	1 not at all	3	2 seldom	2 seldom	3	3	2	3	1 not at all	2	2	2	1 not at all true	3	3	2	2	3	3	3	3	3	3	3	4	1	3	3	3	2	4	2	3
2024/01/30 12:00:08 PM CET	Nurse	Male	Outpatient	6-10	manager	31-35	Single	0-1 times per week	4	2	1 never	1 never	3	3	3	3	3	3	3	2	3	3	2	3	3	2	2	4	3	3	3	4	4	2	3	5	3	2	3	3	3
2024/01/30 12:00:18 PM CET	Technician	Male	fisioterapia	> 20	caporeparto	51-55	Married/in a relationship	0-1 times per week	5 totally	5 totally	1 never	1 never	5 totally	5 totally	4	4	5 totally	3	3	5 totally true	1 not at all true	4	4	3	4	4	3	4	2	3	2	3	5	1	3	1	5	2	5	2	3
2024/01/30 12:01:18 PM CET	Physician	Male	Surgery plastica	0-5	Worker	26-30	Single	2-3 times per week	3	2	1 never	1 never	5 totally	5 totally	5 totally	4	3	4	4	4	4	4	4	4	4	4	4	4	4	4	4	2	5	3	4	4	5	2	5	1	4
2024/01/30 12:01:24 PM CET	Nurse	Female	Intensive care medicine	> 20	manager	51-55	Single	2-3 times per week	4	3	3 sometimes	1 never	4	4	4	4	4	3	2	3	3	4	4	3	4	4	4	4	4	4	4	4	5	1	4	3	5	1	5	1	4
2024/01/30 12:01:58 PM CET	Technician	Female	Technical sector	> 20	Assistente	56-60	Single	0-1 times per week	4	3	1 never	3 sometimes	4	4	4	4	4	5 totally true	1 not at all true	4	5 totally true	3	4	3	4	3	3	3	3	4	3	3	4	2	3	3	3	2	5	3	2
2024/01/30 12:02:44 PM CET	Administrative sector worker	Female	Serviceso Sociale	0-5	Worker	26-30	Single	2-3 times per week	3	1 not at all	3 sometimes	2 seldom	2	2	2	4	3	2	1 not at all true	1 not at all true	1 not at all true	3	3	1	4	3	3	4	4	4	4	5	5	4	4	1	3	3	5	3	4
2024/01/30 12:03:48 PM CET	Technician	Male	Tecnical sector	> 20	Worker	56-60	Single	2-3 times per week	5 totally	1 not at all	5 very often	2 seldom	5 totally	4	5 totally	5 totally	5 totally	4	2	1 not at all true	3	4	4	4	4	4	4	4	4	4	4	5	5	1	5	4	4	2	5	1	5
2024/01/30 12:03:50 PM CET	Physician	Female	Internal medicine	11-15	Manager	46-50	Married/in a relationship	0-1 times per week	2	3	2 seldom	1 never	4	4	3	3	2	2	1 not at all true	1 not at all true	1 not at all true	3	2	2	3	3	3	3	2	3	2	4	5	4	3	3	3	3	4	4	3
2024/01/30 12:04:30 PM CET	Administrative sector worker	Male	Emergency medicine	16-20	Manager	41-45	Single	0-1 times per week	4	1 not at all	1 never	1 never	4	4	4	3	4	3	3	4	4	3	3	2	3	3	3	3	3	3	3	4	4	3	4	2	4	3	4	3	4
2024/01/30 12:04:33 PM CET	Tecnico di services	Male	Services	11-15	executive	31-35	Single	2-3 times per week	3	1 not at all	3 sometimes	2 seldom	4	4	4	4	3	4	3	4	4	4	4	3	4	3	3	4	4	4	3	4	5	2	4	1	4	2	5	2	4
2024/01/30 12:05:27 PM CET	Nurse	Female	AMBInternal medicine	> 20	Worker	46-50	Married/in a relationship	2-3 times per week	5 totally	2	4 often	1 never	4	4	4	4	3	2	4	3	3	3	3	3	3	3	3	3	3	3	3	2	4	4	3	3	2	2	4	2	3
2024/01/30 12:05:48 PM CET	Nurse	Female	Surgery	6-10	Worker	31-35	Married/in a relationship	0-1 times per week	2	1 not at all	2 seldom	2 seldom	5 totally	5 totally	5 totally	3	3	3	3	3	4	3	3	3	3	3	3	4	4	4	3	3	4	3	4	1	3	1	4	2	4
2024/01/30 12:06:42 PM CET	Nurse	Female	Serviceso infermieristico	6-10	Executive	26-30	Single	2-3 times per week	2	1 not at all	2 seldom	2 seldom	4	4	4	3	3	4	2	2	2	4	4	3	4	4	3	3	2	3	3	5	5	2	3	1	3	3	4	2	4
2024/01/30 12:10:46 PM CET	Nurse	Male	Anaesthesia	16-20	Worker	46-50	Married/in a relationship	0-1 times per week	3	1 not at all	1 never	1 never	4	3	4	3	2	4	4	3	2	4	3	3	4	2	4	4	3	3	3	3	4	3	3	2	4	2	3	2	5
2024/01/30 12:10:59 PM CET	Physician	Male	Medicina Nucleare	6-10	Manager	35-40	Married/in a relationship	0-1 times per week	1 not at all	4	1 never	1 never	4	4	4	3	3	3	2	5 totally true	4	4	3	2	2	3	3	3	3	3	2	3	4	4	2	3	4	1	4	2	4
2024/01/30 12:13:12 PM CET	Nurse	Female	Internal medicine	0-5	Worker	18-25	Single	2-3 times per week	3	2	1 never	1 never	4	3	4	3	2	1 not at all true	1 not at all true	3	3	3	2	2	3	3	2	3	2	2	1	5	4	2	2	4	1	2	4	3	4
2024/01/30 12:13:22 PM CET	Administrative sector worker	Male	Surgery	16-20	Worker	51-55	Married/in a relationship	0-1 times per week	5 totally	5 totally	1 never	1 never	5 totally	5 totally	5 totally	5 totally	5 totally	3	2	1 not at all true	1 not at all true	4	4	4	4	3	4	4	4	4	4	1	5	1	5	1	5	3	4	2	2
2024/01/30 12:14:12 PM CET	Nurse	Male	Administration	6-10	executive	31-35	Married/in a relationship	2-3 times per week	4	1 not at all	3 sometimes	3 sometimes	4	4	4	4	4	4	3	3	4	4	4	2	3	3	3	3	3	3	3	3	4	2	4	2	4	2	4	2	4
2024/01/30 12:15:19 PM CET	psicologa	Female	internal medicine	11-15	neuropsicologo	41-45	Married/in a relationship	0-1 times per week	5 totally	1 not at all	3 sometimes	3 sometimes	4	4	5 totally	4	4	2	4	5 totally true	5 totally true	3	3	3	4	3	3	4	4	4	3	2	5	3	4	2	5	4	4	3	3
2024/01/30 12:16:23 PM CET	Administrative sector worker	Male	Administration	0-5	Worker	31-35	Single	2-3 times per week	5 totally	3	1 never	2 seldom	4	4	4	3	4	4	4	5 totally true	4	4	4	4	4	4	4	4	4	4	4	2	5	2	5	1	5	2	5	1	5
2024/01/30 12:16:35 PM CET	Nurse	Female	Internal medicine	0-5	Worker	26-30	Single	2-3 times per week	4	1 not at all	2 seldom	1 never	4	4	4	3	3	2	2	2	2	3	3	3	3	3	4	4	4	4	3	3	4	3	4	3	4	3	4	2	4
2024/01/30 12:16:47 PM CET	Physician	Male	Surgery	16-20	Executive	46-50	Married/in a relationship	0-1 times per week	1 not at all	2	1 never	1 never	5 totally	5 totally	5 totally	4	4	5 totally true	2	4	3	4	4	2	4	4	4	4	4	4	4	5	5	3	3	4	4	2	4	4	4
2024/01/30 12:17:13 PM CET	Nurse	Female	Surgery	16-20	Worker	35-40	Married/in a relationship	0-1 times per week	1 not at all	3	1 never	1 never	3	2	3	4	3	1 not at all true	1 not at all true	2	1 not at all true	4	4	4	4	4	4	2	4	4	3	2	5	3	5	5	5	5	5	5	4
2024/01/30 12:17:53 PM CET	Nurse	Female	Internal medicine	0-5	Worker	18-25	Married/in a relationship	0-1 times per week	3	1 not at all	1 never	1 never	4	4	4	4	4	3	2	4	4	3	3	3	3	3	4	4	2	4	3	2	5	3	3	4	5	3	4	4	4
2024/01/30 12:18:07 PM CET	Physician	Female	Internal medicine	0-5	Worker	35-40	Married/in a relationship	2-3 times per week	1 not at all	1 not at all	2 seldom	2 seldom	4	4	3	3	1 not at all	1 not at all true	4	1 not at all true	1 not at all true	3	3	3	2	3	4	3	3	3	3	4	4	1	2	2	3	2	4	1	3
2024/01/30 12:19:02 PM CET	Nurse	Female	Internal medicine	> 20	Worker	56-60	Married/in a relationship	0-1 times per week	2	3	3 sometimes	2 seldom	4	4	4	3	3	4	4	3	3	3	2	2	3	2	2	2	3	3	3	4	5	1	4	4	4	3	4	1	3
2024/01/30 12:19:40 PM CET	Nurse	Male	Cure palliative	16-20	executive	46-50	Married/in a relationship	0-1 times per week	3	1 not at all	1 never	1 never	3	3	3	3	3	3	3	3	3	4	4	3	4	4	4	3	4	4	2	4	5	1	3	1	5	2	5	2	5
2024/01/30 12:20:11 PM CET	neuropsi	Female	Internal medicine	6-10	neuropsicologo	31-35	Married/in a relationship	0-1 times per week	5 totally	2	1 never	1 never	2	2	3	3	3	2	1 not at all true	1 not at all true	1 not at all true	3	3	3	3	3	2	2	3	2	3	3	5	2	4	2	5	3	4	1	4
2024/01/30 12:20:36 PM CET	Physician	Female	Emergency medicine	6-10	manager	31-35	Single	0-1 times per week	2	5 totally	1 never	1 never	4	3	4	3	3	2	2	2	2	4	3	4	4	4	4	4	3	4	4	4	5	3	3	2	4	3	5	3	2
2024/01/30 12:20:54 PM CET	Physician	Male	Neurosurgery	6-10	manager	31-35	Married/in a relationship	0-1 times per week	1 not at all	4	3 sometimes	3 sometimes	4	4	4	3	1 not at all	2	4	3	1 not at all true	3	3	4	3	4	4	4	3	4	3	2	4	1	4	2	4	2	4	1	4
2024/01/30 12:21:11 PM CET	Administrative sector worker	Female	Outpatient	11-15	Worker	56-60	Married/in a relationship	0-1 times per week	3	3	3 sometimes	1 never	3	3	3	3	2	1 not at all true	1 not at all true	1 not at all true	2	3	3	3	3	3	3	3	2	4	4	4	4	1	4	3	4	3	4	2	3
2024/01/30 12:22:16 PM CET	Administrative sector worker	Female	Outpatient	6-10	Worker	51-55	Married/in a relationship	0-1 times per week	3	3	1 never	1 never	4	4	4	4	4	3	1 not at all true	3	3	3	3	3	3	3	3	3	3	3	3	4	4	4	4	2	4	2	4	1	4
2024/01/30 12:24:00 PM CET	Technician	Male	Tecnical sector	0-5	Executive	46-50	Married/in a relationship	0-1 times per week	4	3	1 never	1 never	4	4	4	4	4	4	3	4	4	4	3	3	4	4	4	4	3	4	4	4	4	2	4	2	2	1	4	3	4
2024/01/30 12:24:32 PM CET	Technician	Female	Surgery	> 20	Worker	56-60	Single	2-3 times per week	1 not at all	1 not at all	1 never	1 never	5 totally	5 totally	5 totally	4	1 not at all	2	2	3	3	1	1	1	1	1	1	1	1	1	0	2	2	3	2	1	3	2	4	3	4
2024/01/30 12:24:39 PM CET	Nurse	Female	Internal medicine	0-5	Worker	18-25	Married/in a relationship	2-3 times per week	2	1 not at all	2 seldom	1 never	4	3	4	3	3	4	3	4	2	3	3	2	4	3	3	3	2	2	2	4	4	2	3	3	2	4	4	3	3
2024/01/30 12:24:52 PM CET	Nurse	Female	Internal medicine	0-5	Addetta alle cure sociosanitarie	26-30	Married/in a relationship	0-1 times per week	3	3	2 seldom	1 never	4	4	4	3	2	3	3	5 totally true	5 totally true	4	3	3	3	2	2	3	3	4	3	3	5	1	3	1	5	2	5	3	5
2024/01/30 12:25:17 PM CET	Administrative sector worker	Female	Surgery	0-5	Manager	41-45	Married/in a relationship	0-1 times per week	4	1 not at all	2 seldom	3 sometimes	3	3	3	3	4	3	3	3	2	4	4	3	4	4	3	3	3	4	3	4	5	2	4	1	4	2	4	4	4
2024/01/30 12:26:46 PM CET	Physician	Female	Internal medicine	11-15	assistente	35-40	Married/in a relationship	0-1 times per week	3	1 not at all	1 never	1 never	4	4	4	4	2	3	5 totally true	2	4	4	3	3	4	3	3	3	3	3	3	3	4	2	3	2	4	2	3	2	2
2024/01/30 12:27:16 PM CET	Administrative sector worker	Female	Administration	> 20	Manager	35-40	Married/in a relationship	0-1 times per week	4	1 not at all	3 sometimes	1 never	3	3	3	3	4	4	4	4	2	3	3	2	3	4	3	3	2	3	2	5	5	3	4	2	2	1	4	3	1
2024/01/30 12:27:49 PM CET	Hospitality staff	Female	Hospitality	0-5	Worker	51-55	Married/in a relationship	0-1 times per week	5 totally	2	2 seldom	1 never	5 totally	5 totally	4	4	4	4	4	1 not at all true	2	4	4	3	3	3	3	2	3	3	2	4	5	1	3	2	3	1	5	4	2
2024/01/30 12:28:12 PM CET	Nurse	Female	Anaesthesia	> 20	manager	56-60	Single	0-1 times per week	3	4	1 never	1 never	3	3	4	5 totally	2	4	2	3	3	3	3	2	4	4	4	3	3	4	3	4	5	1	3	4	5	3	5	3	4
2024/01/30 12:28:33 PM CET	Nurse	Female	Creoc	11-15	Worker	31-35	Married/in a relationship	0-1 times per week	1 not at all	5 totally	1 never	1 never	4	4	3	4	3	3	2	5 totally true	3	4	4	3	4	3	3	3	3	4	3	5	5	1	3	3	4	1	5	1	5
2024/01/30 12:28:41 PM CET	Nurse	Female	Cardiologia	> 20	Worker	46-50	Married/in a relationship	2-3 times per week	1 not at all	2	3 sometimes	1 never	3	3	4	3	3	2	2	3	3	4	3	3	3	3	4	4	4	4	4	2	5	3	4	1	5	2	5	2	5
2024/01/30 12:29:06 PM CET	Nurse	Female	Surgery	> 20	executive	46-50	Single	0-1 times per week	2	1 not at all	2 seldom	1 never	3	3	3	4	3	2	2	2	3	4	4	2	3	4	4	3	3	4	3	5	5	3	4	5	5	1	5	1	3
2024/01/30 12:29:09 PM CET	Physician	Male	Emergency medicine	0-5	Worker	35-40	Married/in a relationship	0-1 times per week	4	1 not at all	1 never	1 never	5 totally	5 totally	5 totally	4	3	3	4	4	4	4	3	4	4	4	3	3	4	4	4	1	4	3	5	1	5	2	4	1	5
2024/01/30 12:29:37 PM CET	Administrative sector worker	Female	Internal medicine	0-5	Worker	41-45	Married/in a relationship	0-1 times per week	2	3	3 sometimes	1 never	2	2	1 not at all	3	3	2	1 not at all true	1 not at all true	1 not at all true	4	3	2	3	4	4	3	3	4	4	5	5	1	3	1	2	1	4	1	1
2024/01/30 12:29:42 PM CET	Nurse	Male	Prevenzione infezioni	11-15	manager	41-45	Married/in a relationship	2-3 times per week	4	3	2 seldom	1 never	3	3	3	5 totally	3	4	4	3	3	4	4	4	3	4	3	3	3	3	3	3	5	1	4	1	2	1	5	3	5
2024/01/30 12:30:07 PM CET	Technician	Female	Services	0-5	Executive	26-30	Single	0-1 times per week	1 not at all	2	1 never	1 never	2	2	3	4	2	2	2	4	2	3	3	2	3	3	3	3	2	3	2	5	5	2	2	3	3	3	4	3	4
2024/01/30 12:30:34 PM CET	Administrative sector worker	Female	Surgery e ostetricia	> 20	Worker	35-40	Married/in a relationship	0-1 times per week	5 totally	1 not at all	3 sometimes	1 never	5 totally	5 totally	5 totally	5 totally	4	2	1 not at all true	1 not at all true	1 not at all true	4	4	4	4	4	4	4	4	4	4	3	5	1	3	1	5	1	4	1	3
2024/01/30 12:31:55 PM CET	Nurse	Female	Direzione infermieristica	> 20	Executive	56-60	Married/in a relationship	2-3 times per week	3	3	3 sometimes	1 never	4	4	5 totally	4	3	5 totally true	4	4	4	4	3	4	3	3	3	4	4	4	2	3	5	3	3	4	3	1	4	2	2
2024/01/30 12:33:13 PM CET	Nurse	Female	Emergency medicine	> 20	Worker	46-50	Married/in a relationship	0-1 times per week	2	3	2 seldom	1 never	3	4	4	3	1 not at all	3	3	5 totally true	4	3	3	3	3	3	2	3	1	3	2	3	5	4	3	2	5	2	3	2	3
2024/01/30 12:34:33 PM CET	Physician	Female	Anaesthesia	0-5	manager	35-40	Married/in a relationship	0-1 times per week	1 not at all	2	1 never	1 never	2	1 not at all	1 not at all	2	2	4	4	3	1 not at all true	3	2	2	3	2	3	2	2	3	3	5	4	3	3	1	3	5	4	2	3
2024/01/30 12:36:14 PM CET	Nurse	Female	Surgery	0-5	Worker	26-30	Single	2-3 times per week	2	1 not at all	2 seldom	1 never	4	4	4	3	3	1 not at all true	1 not at all true	3	1 not at all true	4	3	3	4	2	3	3	3	4	3	4	4	3	4	3	3	3	3	3	2
2024/01/30 12:39:14 PM CET	Physician	Female	Internal medicine	0-5	Assistente	26-30	Married/in a relationship	0-1 times per week	2	2	1 never	1 never	4	4	3	3	2	3	3	2	3	4	4	3	3	3	3	3	3	3	2	1	4	2	2	5	5	1	4	3	2
2024/01/30 12:39:25 PM CET	Administrative sector worker	Female	Surgery	11-15	Worker	46-50	Married/in a relationship	2-3 times per week	2	2	1 never	1 never	5 totally	5 totally	5 totally	4	3	3	3	3	2	3	3	3	4	4	3	3	3	3	3	5	5	4	4	3	5	3	4	4	4
2024/01/30 12:39:26 PM CET	Technician	Male	Services	11-15	Executive	35-40	Married/in a relationship	0-1 times per week	1 not at all	1 not at all	1 never	1 never	2	2	2	4	4	1 not at all true	1 not at all true	4	4	4	4	3	4	2	2	4	4	3	3	4	4	4	4	5	1	4	3	2	1
2024/01/30 12:39:41 PM CET	Nurse	Male	Anaesthesia	0-5	manager	31-35	Single	2-3 times per week	5 totally	2	1 never	1 never	4	4	4	3	5 totally	5 totally true	3	2	3	4	3	4	3	3	3	3	3	4	3	5	4	2	4	3	4	2	3	4	5
2024/01/30 12:40:02 PM CET	Nurse	Male	Anaesthesia	6-10	manager	31-35	Single	2-3 times per week	2	1 not at all	1 never	1 never	4	4	4	4	3	1 not at all true	1 not at all true	3	3	4	4	4	4	4	4	4	3	4	4	3	5	3	4	1	4	4	4	2	5
2024/01/30 12:40:41 PM CET	Nurse	Male	Internal medicine	0-5	Worker	18-25	Married/in a relationship	2-3 times per week	3	2	3 sometimes	3 sometimes	4	5 totally	4	4	2	4	3	4	4	3	3	3	2	2	3	3	3	2	2	4	5	2	4	4	5	1	5	2	3
2024/01/30 12:41:09 PM CET	Administrative sector worker	Female	Outpatient	> 20	Worker	51-55	Single	0-1 times per week	5 totally	1 not at all	2 seldom	1 never	4	4	4	4	4	2	2	3	3	3	3	3	3	3	3	3	3	3	3	4	5	1	4	2	4	2	4	1	3
2024/01/30 12:41:22 PM CET	Physician	Female	Internal medicine	0-5	Worker	26-30	Single	0-1 times per week	4	1 not at all	1 never	1 never	5 totally	5 totally	5 totally	4	2	3	4	2	2	4	3	2	4	3	3	3	1	2	4	2	4	4	5	2	4	3	3	1	1
2024/01/30 12:42:00 PM CET	Nurse	Female	Internal medicine	16-20	Worker	41-45	Single	0-1 times per week	1 not at all	2	1 never	1 never	3	3	3	3	2	2	2	2	2	3	3	2	3	2	2	2	2	2	2	4	4	3	3	4	2	2	4	2	4
2024/01/30 12:43:42 PM CET	Nurse	Female	Internal medicine	11-15	Worker	35-40	Married/in a relationship	2-3 times per week	2	2	2 seldom	1 never	2	2	2	2	2	3	3	3	3	3	3	2	1	3	2	3	2	3	3	3	4	1	1	4	3	3	4	3	3
2024/01/30 12:45:32 PM CET	Nurse	Female	Intensive care medicine	0-5	Worker	18-25	Single	0-1 times per week	2	1 not at all	4 often	2 seldom	3	3	4	4	2	2	3	2	2	4	3	2	3	2	3	3	1	2	3	4	5	3	4	4	4	2	4	2	3
2024/01/30 12:46:17 PM CET	Technician	Female	Services	16-20	Normale worker	35-40	Married/in a relationship	2-3 times per week	2	3	2 seldom	1 never	4	4	4	4	3	2	2	2	2	3	2	2	2	3	2	3	2	3	3	3	4	3	4	3	4	2	4	3	5
2024/01/30 12:48:44 PM CET	Administrative sector worker	Female	Administration	0-5	worker amministrativo	18-25	Single	2-3 times per week	3	1 not at all	1 never	1 never	3	3	4	4	3	1 not at all true	1 not at all true	2	3	4	2	4	1	2	4	3	3	4	4	1	4	2	5	3	3	2	3	1	5
2024/01/30 12:50:58 PM CET	Hospitality staff	Male	Hospitality	> 20	Executive	41-45	Married/in a relationship	2-3 times per week	4	5 totally	1 never	1 never	4	3	5 totally	4	5 totally	1 not at all true	1 not at all true	4	4	4	4	3	4	2	3	4	3	4	3	4	5	1	5	2	3	1	4	2	3
2024/01/30 12:53:23 PM CET	Hospitality staff	Female	Hospitality	0-5	dietista	18-25	Single	2-3 times per week	5 totally	1 not at all	1 never	1 never	5 totally	4	4	4	4	3	3	4	4	4	4	3	4	2	3	4	4	4	2	4	5	2	3	2	4	2	5	4	3
2024/01/30 12:54:32 PM CET	Nurse	Female	Internal medicine	6-10	Worker	26-30	Married/in a relationship	0-1 times per week	2	3	1 never	1 never	4	3	4	3	2	1 not at all true	1 not at all true	2	2	3	3	4	3	4	3	3	3	3	3	3	4	2	3	2	4	2	4	1	5
2024/01/30 12:57:00 PM CET	Nurse	Female	Internal medicine	11-15	manager	31-35	Married/in a relationship	0-1 times per week	4	4	1 never	1 never	4	3	4	4	4	2	3	2	1 not at all true	3	3	1	1	3	4	3	3	4	2	3	5	3	3	2	3	2	4	2	3
2024/01/30 12:57:24 PM CET	Administrative sector worker	Male	Administration	0-5	Worker	18-25	Single	0-1 times per week	3	1 not at all	2 seldom	2 seldom	5 totally	5 totally	5 totally	3	3	5 totally true	5 totally true	3	4	3	3	4	3	1	2	1	2	3	3	2	3	3	5	1	5	3	4	4	3
2024/01/30 12:58:27 PM CET	Physician	Female	internal medicine outpatiento	> 20	physician aggiunto	>60	Single	4-5 times per week	4	3	3 sometimes	2 seldom	5 totally	5 totally	5 totally	5 totally	5 totally	5 totally true	5 totally true	5 totally true	5 totally true	4	3	3	4	4	3	4	3	2	2	3	4	5	4	1	4	4	4	4	4
2024/01/30 12:59:33 PM CET	Administrative sector worker	Female	Administration	16-20	Worker	>60	Single	0-1 times per week	4	1 not at all	1 never	1 never	4	4	4	4	4	1 not at all true	1 not at all true	2	2	3	2	2	2	2	2	1	2	2	2	3	3	1	3	3	3	2	3	2	3
2024/01/30 12:59:57 PM CET	Technician	Male	Tecnical sector	0-5	Executive	46-50	Single	0-1 times per week	1 not at all	2	2 seldom	1 never	5 totally	4	4	4	3	3	3	3	4	4	3	2	2	3	2	3	3	4	3	4	5	3	4	1	3	1	5	1	5
2024/01/30 1:03:16 PM CET	Physician	Female	Anaesthesia	16-20	executive	51-55	Married/in a relationship	2-3 times per week	5 totally	4	2 seldom	1 never	3	3	4	3	3	5 totally true	3	5 totally true	4	4	4	4	3	4	3	3	3	4	3	3	5	1	5	1	4	3	5	3	5
2024/01/30 1:04:34 PM CET	Technician	Female	Cardiologia	0-5	Worker	18-25	Single	0-1 times per week	3	1 not at all	1 never	1 never	5 totally	5 totally	5 totally	5 totally	4	2	2	1 not at all true	1 not at all true	4	2	0	3	3	2	3	2	2	3	3	5	2	4	4	5	2	4	3	5
2024/01/30 1:05:31 PM CET	Administrative sector worker	Female	Services	> 20	Worker	51-55	Single	0-1 times per week	4	2	2 seldom	2 seldom	4	4	4	3	4	4	4	4	3	3	2	4	3	2	3	2	3	3	3	3	5	2	3	3	5	3	5	2	5
2024/01/30 1:06:09 PM CET	Nurse	Female	Internal medicine	11-15	Worker	51-55	Single	0-1 times per week	4	5 totally	3 sometimes	1 never	5 totally	4	4	4	5 totally	2	4	5 totally true	2	4	4	0	2	3	4	3	4	4	4	3	5	1	5	1	2	1	5	1	5
2024/01/30 1:06:35 PM CET	worker	Female	Surgery e ostetricia	> 20	Worker	51-55	Single	2-3 times per week	4	3	3 sometimes	1 never	4	4	4	4	4	2	2	2	3	4	4	4	4	4	4	3	4	4	3	4	5	1	3	3	5	2	4	1	5
2024/01/30 1:08:14 PM CET	Technician	Male	Services	0-5	tecnico in analisi biomediche	26-30	Married/in a relationship	4-5 times per week	5 totally	1 not at all	5 very often	5 very often	5 totally	5 totally	5 totally	5 totally	5 totally	4	2	3	3	4	4	3	4	3	4	4	4	4	4	4	5	1	5	4	4	3	5	2	4
2024/01/30 1:09:37 PM CET	Nurse	Female	Internal medicine	16-20	manager	35-40	Married/in a relationship	0-1 times per week	2	2	1 never	1 never	4	4	4	1 not at all	3	3	2	4	4	3	1	2	1	1	1	2	2	2	2	3	5	3	2	3	4	3	5	2	3
2024/01/30 1:10:49 PM CET	Nurse	Female	Surgery	0-5	Worker	41-45	Married/in a relationship	0-1 times per week	4	1 not at all	1 never	1 never	4	4	5 totally	4	4	4	4	5 totally true	4	4	4	2	0	2	3	3	4	4	3	5	5	4	4	3	3	1	5	1	4
2024/01/30 1:12:29 PM CET	Nurse	Female	Outpatient	16-20	Worker	41-45	Married/in a relationship	0-1 times per week	4	2	2 seldom	2 seldom	4	3	5 totally	4	2	3	4	3	3	4	3	4	4	3	3	2	3	3	3	2	4	3	4	1	5	2	4	1	4
2024/01/30 1:13:34 PM CET	Physician	Male	Surgery	> 20	Executive	51-55	Married/in a relationship	0-1 times per week	4	2	1 never	1 never	4	5 totally	5 totally	5 totally	3	5 totally true	4	4	5 totally true	3	3	3	4	4	4	4	4	4	4	1	5	2	5	2	5	4	5	3	5
2024/01/30 1:13:39 PM CET	Nurse	Female	Internal medicine	11-15	Worker	35-40	Married/in a relationship	0-1 times per week	2	2	1 never	1 never	3	3	3	3	3	3	3	2	1 not at all true	3	4	2	4	2	3	4	3	4	3	5	5	1	4	2	2	2	5	3	2
2024/01/30 1:13:50 PM CET	Administrative sector worker	Male	Internal medicine	0-5	Worker	18-25	Single	2-3 times per week	3	1 not at all	3 sometimes	1 never	4	4	4	4	4	3	3	3	3	3	3	3	3	3	3	3	3	3	3	2	4	3	4	3	2	3	4	1	3
2024/01/30 1:14:51 PM CET	Physician	Female	Outpatient	6-10	manager	31-35	Married/in a relationship	0-1 times per week	2	2	1 never	1 never	4	4	5 totally	5 totally	2	3	2	2	1 not at all true	3	3	2	4	3	4	3	2	3	3	4	5	4	4	4	5	3	5	2	3
2024/01/30 1:15:27 PM CET	Administrative sector worker	Female	Internal medicine	6-10	Worker	35-40	Married/in a relationship	0-1 times per week	1 not at all	5 totally	3 sometimes	1 never	4	4	4	3	1 not at all	3	3	1 not at all true	2	4	4	4	1	2	4	3	3	4	3	3	4	1	4	1	5	1	4	3	5
2024/01/30 1:15:43 PM CET	Nurse	Female	Intensive care medicine	6-10	manager	26-30	Married/in a relationship	0-1 times per week	1 not at all	1 not at all	1 never	1 never	3	2	3	4	1 not at all	2	1 not at all true	1 not at all true	1 not at all true	3	4	2	4	3	4	4	2	4	4	3	5	1	3	4	5	4	5	2	1
2024/01/30 1:15:46 PM CET	professione physician-tecnica	Male	Services	> 20	Executive	51-55	Married/in a relationship	2-3 times per week	4	1 not at all	2 seldom	2 seldom	4	4	4	4	5 totally	4	3	2	3	4	3	3	3	3	3	4	4	4	3	4	5	2	4	5	3	2	4	1	4
2024/01/30 1:18:44 PM CET	Administrative sector worker	Female	Services	11-15	Worker	31-35	Married/in a relationship	0-1 times per week	5 totally	5 totally	1 never	1 never	4	4	4	3	4	4	4	4	4	3	3	2	2	3	3	2	2	2	2	2	5	1	4	3	4	1	4	2	3
2024/01/30 1:20:22 PM CET	Nurse	Female	Outpatient	0-5	Worker	35-40	Married/in a relationship	4-5 times per week	5 totally	1 not at all	1 never	1 never	4	4	4	4	4	2	2	3	3	4	4	4	4	4	3	3	4	4	3	3	4	1	4	3	3	1	4	2	4
2024/01/30 1:20:37 PM CET	Nurse	Male	sala operatoria	11-15	Worker	46-50	Married/in a relationship	2-3 times per week	2	2	1 never	1 never	2	2	2	2	2	3	2	1 not at all true	1 not at all true	4	4	3	3	2	2	4	4	4	4	3	5	1	5	3	5	1	5	3	2
2024/01/30 1:22:18 PM CET	worker	Female	Otorinolaringoiatria	16-20	Worker	35-40	Married/in a relationship	0-1 times per week	2	4	1 never	1 never	5 totally	5 totally	4	4	5 totally	1 not at all true	1 not at all true	3	2	3	4	2	2	3	3	3	2	4	3	3	5	1	4	1	5	3	4	1	3
2024/01/30 1:23:39 PM CET	Physician	Male	Neurosurgery	> 20	Executive	46-50	Married/in a relationship	2-3 times per week	2	5 totally	3 sometimes	3 sometimes	4	4	5 totally	4	3	4	2	4	3	4	3	3	4	4	4	4	4	4	3	4	5	1	4	1	5	1	5	4	4
2024/01/30 1:25:56 PM CET	Administrative sector worker	Female	Internal medicine	0-5	Worker	51-55	Married/in a relationship	2-3 times per week	2	1 not at all	1 never	1 never	4	4	4	3	4	3	3	3	3	3	4	4	4	3	4	3	3	4	4	5	5	4	5	4	3	2	5	2	4
2024/01/30 1:26:59 PM CET	Technician	Female	Services	6-10	Worker	31-35	Single	4-5 times per week	3	2	4 often	4 often	3	3	4	4	3	3	3	2	2	3	3	2	3	3	3	3	3	3	2	2	4	3	4	2	4	2	3	3	3
2024/01/30 1:27:10 PM CET	Nurse	Male	Anaesthesia	> 20	manager	>60	Single	0-1 times per week	3	5 totally	1 never	1 never	3	3	2	4	2	2	1 not at all true	1 not at all true	1 not at all true	3	1	3	1	1	3	2	2	3	3	3	5	2	3	3	3	2	4	2	3
2024/01/30 1:29:51 PM CET	Physician	Male	Surgery	> 20	Executive	>60	Married/in a relationship	more than 5 times per week	1 not at all	1 not at all	1 never	1 never	4	4	4	4	4	4	4	4	4	4	4	4	4	4	4	4	4	4	4	1	5	1	4	2	5	1	5	4	3
2024/01/30 1:31:59 PM CET	Physician	Male	Surgery e ostetricia	0-5	Worker	35-40	Married/in a relationship	0-1 times per week	1 not at all	4	1 never	1 never	4	4	5 totally	3	3	3	3	2	3	4	4	4	4	4	4	4	1	4	4	4	5	1	4	1	4	3	4	1	4
2024/01/30 1:34:54 PM CET	Hospitality staff	Female	Hospitality	11-15	Worker worker	>60	Single	0-1 times per week	1 not at all	2	3 sometimes	1 never	3	3	3	3	4	1 not at all true	1 not at all true	1 not at all true	1 not at all true	2	4	4	3	1	3	2	3	3	2	4	5	2	4	2	4	3	4	4	2
2024/01/30 1:37:06 PM CET	Administrative sector worker	Male	Administration	16-20	Worker	41-45	Married/in a relationship	0-1 times per week	5 totally	3	1 never	1 never	5 totally	4	5 totally	4	4	1 not at all true	1 not at all true	3	3	2	3	2	2	2	3	2	2	3	2	4	4	1	2	2	3	3	4	3	3
2024/01/30 1:40:04 PM CET	Technician	Female	Services	6-10	Worker	35-40	Married/in a relationship	0-1 times per week	1 not at all	1 not at all	1 never	1 never	3	2	3	1 not at all	2	1 not at all true	1 not at all true	1 not at all true	1 not at all true	4	3	1	3	4	4	3	3	4	3	4	5	2	3	4	3	3	4	3	3
2024/01/30 1:41:47 PM CET	Administrative sector worker	Female	Administration	> 20	Worker	46-50	Married/in a relationship	2-3 times per week	5 totally	4	4 often	4 often	2	3	3	5 totally	5 totally	1 not at all true	1 not at all true	1 not at all true	1 not at all true	4	3	4	4	4	4	3	3	4	3	1	4	4	5	1	5	2	5	2	5
2024/01/30 1:41:59 PM CET	worker	Female	Surgery	6-10	Worker	18-25	Single	0-1 times per week	2	1 not at all	1 never	2 seldom	3	3	4	2	3	4	4	5 totally true	4	4	2	2	3	3	4	3	2	2	1	2	4	1	2	3	5	3	3	1	5
2024/01/30 1:42:38 PM CET	Physician	Female	Internal medicine	0-5	Worker	26-30	Single	0-1 times per week	3	1 not at all	2 seldom	2 seldom	4	4	4	4	2	2	2	2	1 not at all true	3	2	3	3	2	3	2	2	3	2	2	3	3	1	1	3	1	2	2	4
2024/01/30 1:44:15 PM CET	Nurse	Female	Anaesthesia	> 20	manager	46-50	Single	0-1 times per week	1 not at all	1 not at all	1 never	1 never	3	3	4	4	4	4	1 not at all true	1 not at all true	1 not at all true	4	4	3	4	4	4	4	4	4	4	5	5	3	4	5	1	1	5	4	5
2024/01/30 1:44:45 PM CET	Nurse	Female	Internal medicine	0-5	Worker	18-25	Single	0-1 times per week	3	2	1 never	1 never	4	4	4	3	2	2	2	4	3	3	3	2	4	3	3	3	2	3	2	3	5	3	2	3	3	4	4	4	3
2024/01/30 1:47:41 PM CET	Worker	Female	Internal medicine	6-10	Worker	26-30	Married/in a relationship	0-1 times per week	3	1 not at all	1 never	1 never	4	4	4	4	3	3	3	3	3	4	3	4	3	3	3	4	2	3	2	4	5	2	5	2	3	3	5	2	2
2024/01/30 1:49:41 PM CET	Administrative sector worker	Female	Administration	16-20	Worker	31-35	Married/in a relationship	0-1 times per week	3	4	1 never	1 never	3	3	2	2	2	1 not at all true	1 not at all true	1 not at all true	1 not at all true	3	3	3	4	4	3	2	2	3	3	3	4	2	3	5	3	4	4	5	3
2024/01/30 1:49:45 PM CET	Nurse	Male	Medicina penitenziaria	11-15	Worker	35-40	Married/in a relationship	2-3 times per week	4	1 not at all	1 never	1 never	5 totally	4	5 totally	4	4	3	4	4	3	4	3	2	2	4	3	3	3	2	2	4	5	3	4	4	3	2	4	1	3
2024/01/30 1:50:14 PM CET	Physician	Female	Surgery	0-5	Physician sostituto manager	31-35	Married/in a relationship	2-3 times per week	2	1 not at all	2 seldom	1 never	4	3	4	4	2	3	3	4	2	3	3	2	3	3	4	3	2	3	3	5	5	3	2	3	3	2	4	3	3
2024/01/30 1:50:58 PM CET	Physician	Male	Surgery	6-10	Manager	41-45	Single	2-3 times per week	2	1 not at all	3 sometimes	3 sometimes	4	4	3	3	1 not at all	2	3	4	4	4	4	4	3	4	4	4	3	4	3	2	4	3	2	2	5	3	3	3	5
2024/01/30 1:51:34 PM CET	Nurse	Female	Emergency medicine	> 20	Worker	>60	Married/in a relationship	4-5 times per week	3	1 not at all	1 never	1 never	4	3	4	4	2	4	3	4	3	3	3	3	3	4	3	3	3	3	3	2	5	1	4	3	4	2	4	2	3
2024/01/30 1:54:44 PM CET	Lavoratore serviceso informatico	Male	Services	> 20	Worker	41-45	Married/in a relationship	2-3 times per week	3	1 not at all	2 seldom	2 seldom	4	4	4	4	3	1 not at all true	1 not at all true	3	3	3	3	1	4	2	3	3	2	2	2	5	4	4	3	3	2	4	4	2	3
2024/01/30 1:57:05 PM CET	Nurse	Female	Internal medicine	> 20	nurse	46-50	Single	2-3 times per week	5 totally	5 totally	1 never	1 never	3	3	3	2	3	5 totally true	2	5 totally true	2	3	4	4	2	3	3	3	3	4	4	2	5	5	3	3	3	3	5	1	3
2024/01/30 1:57:09 PM CET	Administrative sector worker	Female	Internal medicine	16-20	Manager	56-60	Married/in a relationship	0-1 times per week	3	2	1 never	1 never	4	4	4	4	3	3	4	3	3	4	4	3	4	4	3	4	4	4	4	5	5	1	4	3	4	1	5	1	5
2024/01/30 1:59:27 PM CET	Hospitality staff	Female	Hospitality	0-5	Worker	26-30	Married/in a relationship	0-1 times per week	4	1 not at all	2 seldom	1 never	3	4	3	4	5 totally	4	5 totally true	5 totally true	5 totally true	4	4	3	4	3	4	4	4	4	3	4	5	2	2	1	5	1	5	2	1
2024/01/30 1:59:35 PM CET	Technician	Male	Tecnical sector	0-5	Worker	18-25	Single	4-5 times per week	4	1 not at all	2 seldom	1 never	3	4	5 totally	4	3	2	3	4	2	4	3	4	3	2	3	2	3	3	4	3	4	5	4	3	3	3	4	2	4
2024/01/30 1:59:58 PM CET	Logopedista	Female	Consulente, principalmente in internal medicine + stroke unit, neurosurgery, intensive care medicine e internal medicine	6-10	Worker	26-30	Married/in a relationship	2-3 times per week	5 totally	1 not at all	2 seldom	2 seldom	5 totally	5 totally	5 totally	4	4	1 not at all true	1 not at all true	3	3	4	4	2	2	3	3	2	2	4	4	1	5	1	2	2	3	3	4	2	4
2024/01/30 2:01:32 PM CET	levatrice	Female	Surgery e ostetricia	> 20	levatrice specialista	56-60	Married/in a relationship	2-3 times per week	4	3	2 seldom	1 never	3	3	3	2	4	4	3	3	3	2	2	3	3	3	3	3	2	3	3	4	5	2	3	2	3	3	5	3	4
2024/01/30 2:01:46 PM CET	Nurse	Female	Serviceso Infermieristico	> 20	Executive	51-55	Married/in a relationship	0-1 times per week	2	2	2 seldom	1 never	3	3	3	4	2	3	2	1 not at all true	1 not at all true	3	4	3	4	3	3	3	3	4	3	5	5	3	3	1	3	2	4	3	4
2024/01/30 2:04:33 PM CET	Psicologa	Female	Outpatient	0-5	Worker	26-30	Single	2-3 times per week	4	1 not at all	3 sometimes	4 often	3	3	4	2	2	2	2	2	4	4	3	2	2	2	3	3	2	3	3	3	4	3	3	4	4	3	4	3	4
2024/01/30 2:09:26 PM CET	Technician	Female	Internal medicine	11-15	Worker	31-35	Married/in a relationship	2-3 times per week	3	3	1 never	1 never	4	3	4	3	3	3	3	3	3	3	3	2	4	3	3	2	2	2	3	3	5	1	2	3	4	2	4	2	3
2024/01/30 2:10:07 PM CET	Nurse	Female	Internal medicine	6-10	manager	31-35	Married/in a relationship	0-1 times per week	2	1 not at all	3 sometimes	1 never	4	3	5 totally	2	1 not at all	2	2	2	2	3	1	2	2	2	3	3	2	3	2	5	5	4	3	1	3	3	5	3	5
2024/01/30 2:10:41 PM CET	Nurse	Female	Internal medicine	> 20	manager	46-50	Married/in a relationship	0-1 times per week	1 not at all	3	2 seldom	1 never	2	2	2	2	3	2	2	2	3	4	3	2	2	1	3	2	2	2	1	4	5	3	4	2	2	4	4	3	4
2024/01/30 2:12:02 PM CET	Physician	Female	Surgery	0-5	worker	31-35	Married/in a relationship	0-1 times per week	3	1 not at all	4 often	4 often	3	3	3	3	1 not at all	4	4	5 totally true	3	2	3	2	4	1	4	3	4	4	2	2	5	4	3	4	2	2	3	2	2
2024/01/30 2:14:13 PM CET	Technician	Female	Technical sector	6-10	Worker	31-35	Married/in a relationship	2-3 times per week	3	2	1 never	1 never	2	2	2	4	3	3	3	2	3	2	3	2	2	2	3	3	2	3	2	3	4	4	4	4	4	3	5	4	3
2024/01/30 2:14:22 PM CET	Physician	Male	Internal medicine	0-5	Worker	26-30	Single	0-1 times per week	1 not at all	1 not at all	3 sometimes	1 never	3	3	3	1 not at all	1 not at all	1 not at all true	4	1 not at all true	1 not at all true	2	3	3	1	4	3	2	1	2	2	1	3	5	3	2	4	4	2	5	5
2024/01/30 2:14:28 PM CET	Administrative sector worker	Female	Internal medicine	11-15	Worker	51-55	Single	0-1 times per week	5 totally	3	1 never	1 never	4	4	4	4	4	4	4	4	4	4	4	3	3	4	3	3	3	4	3	2	4	2	3	3	4	3	4	3	2
2024/01/30 2:16:58 PM CET	Technician	Male	Technical sector	6-10	Worker	46-50	Married/in a relationship	2-3 times per week	5 totally	3	4 often	4 often	5 totally	3	1 not at all	4	4	1 not at all true	1 not at all true	1 not at all true	1 not at all true	3	4	4	3	2	3	4	4	3	4	4	4	4	5	2	2	1	4	1	2
2024/01/30 2:18:39 PM CET	Physician	Male	Surgery	11-15	executive	41-45	Married/in a relationship	2-3 times per week	1 not at all	5 totally	2 seldom	1 never	5 totally	5 totally	5 totally	4	1 not at all	4	4	1 not at all true	1 not at all true	4	3	2	4	4	3	4	4	4	4	1	5	1	3	2	5	5	5	5	5
2024/01/30 2:21:25 PM CET	Nurse	Female	Internal medicine	> 20	Worker	41-45	Married/in a relationship	0-1 times per week	3	2	1 never	1 never	4	4	5 totally	4	5 totally	1 not at all true	3	3	2	3	4	4	4	4	4	3	3	4	3	4	5	3	3	3	5	3	4	3	5
2024/01/30 2:21:39 PM CET	Administrative sector worker	Female	Tecnical sector	0-5	Worker	41-45	Married/in a relationship	0-1 times per week	2	1 not at all	1 never	1 never	5 totally	5 totally	5 totally	4	5 totally	3	3	3	5 totally true	4	3	4	4	4	4	4	3	4	4	2	5	2	4	4	5	1	5	2	3
2024/01/30 2:23:07 PM CET	Worker	Female	Intensive care medicine	6-10	Worker	31-35	Married/in a relationship	0-1 times per week	3	5 totally	1 never	1 never	4	4	4	3	3	3	1 not at all true	2	4	4	3	2	1	3	3	2	2	3	3	3	5	1	3	4	4	3	5	2	3
2024/01/30 2:25:23 PM CET	Technician	Female	Technical sector	> 20	tecnico di services	51-55	Single	0-1 times per week	3	1 not at all	2 seldom	2 seldom	3	3	2	2	3	1 not at all true	1 not at all true	1 not at all true	2	3	2	3	2	2	2	3	2	2	3	4	4	3	3	4	3	4	3	3	3
2024/01/30 2:27:15 PM CET	Technician	Male	Tecnical sector	0-5	Worker	31-35	Married/in a relationship	0-1 times per week	3	2	1 never	1 never	4	4	4	3	2	2	2	3	2	4	3	3	3	1	2	3	2	3	3	3	4	1	4	2	5	1	4	1	3
2024/01/30 2:28:43 PM CET	Administrative sector worker	Female	Administration	0-5	Worker	26-30	Married/in a relationship	0-1 times per week	3	1 not at all	3 sometimes	3 sometimes	3	3	3	2	3	2	3	3	2	4	3	1	2	3	3	2	3	3	2	3	4	4	2	4	5	3	5	2	5
2024/01/30 2:28:45 PM CET	Administrative sector worker	Female	Hospitality	> 20	Worker	56-60	Married/in a relationship	0-1 times per week	3	2	1 never	1 never	3	3	3	3	4	2	2	2	2	2	4	3	4	2	2	3	2	3	3	4	5	4	4	3	4	3	5	3	2
2024/01/30 2:29:52 PM CET	Physician	Female	Surgery	6-10	Manager	31-35	Married/in a relationship	0-1 times per week	3	2	1 never	1 never	4	4	4	1 not at all	3	3	4	2	2	3	2	1	1	2	3	3	2	3	2	4	5	2	3	1	2	1	5	2	2
2024/01/30 2:34:58 PM CET	Physician	Male	Internal medicine	11-15	Caposerviceso	41-45	Married/in a relationship	2-3 times per week	3	1 not at all	2 seldom	1 never	3	3	3	3	1 not at all	2	5 totally true	1 not at all true	1 not at all true	4	3	3	3	3	3	4	4	4	4	2	5	1	4	1	3	1	5	1	5
2024/01/30 2:36:28 PM CET	Nurse	Female	Intensive care medicine	11-15	manager	35-40	Married/in a relationship	0-1 times per week	4	1 not at all	3 sometimes	1 never	4	4	4	3	4	2	4	4	3	4	2	3	2	3	3	2	2	3	3	4	4	3	4	4	2	2	4	2	2
2024/01/30 2:36:41 PM CET	Nurse	Male	Internal medicine	0-5	Worker	31-35	Married/in a relationship	0-1 times per week	3	5 totally	1 never	1 never	3	2	2	2	3	4	4	2	2	3	3	2	4	4	4	3	2	3	3	4	4	2	3	2	4	5	5	4	5
2024/01/30 2:36:54 PM CET	Physician	Male	Neurosurgery	11-15	manager	35-40	Married/in a relationship	0-1 times per week	1 not at all	2	1 never	1 never	4	4	4	4	1 not at all	4	4	4	3	4	4	3	4	4	3	4	4	4	4	1	5	1	5	1	5	3	5	1	5
2024/01/30 2:37:41 PM CET	Nurse	Female	Internal medicine	> 20	Worker	51-55	Married/in a relationship	4-5 times per week	3	1 not at all	3 sometimes	2 seldom	4	4	4	3	3	2	2	2	2	4	2	1	2	2	1	4	2	3	3	4	4	5	4	4	4	5	5	1	5
2024/01/30 2:39:04 PM CET	Physician	Female	Internal medicine	6-10	manager	31-35	Married/in a relationship	0-1 times per week	3	1 not at all	1 never	1 never	5 totally	5 totally	5 totally	2	4	2	2	4	3	4	4	4	4	4	4	4	4	4	4	4	5	1	4	4	5	3	5	2	4
2024/01/30 2:40:27 PM CET	Nurse	Male	Emergency medicine	0-5	Worker	31-35	Married/in a relationship	2-3 times per week	4	3	1 never	1 never	4	3	4	3	5 totally	2	2	2	4	4	4	3	4	3	4	4	4	4	2	3	5	2	3	1	3	1	4	4	3
2024/01/30 2:43:55 PM CET	Physician	Male	Surgery	0-5	Worker	26-30	Single	2-3 times per week	1 not at all	1 not at all	1 never	1 never	3	3	3	4	2	5 totally true	3	3	3	3	3	2	2	3	3	3	2	2	3	4	5	1	3	4	3	3	5	3	3
2024/01/30 2:48:13 PM CET	Administrative sector worker	Female	PS	11-15	Worker	51-55	Single	0-1 times per week	1 not at all	1 not at all	2 seldom	1 never	5 totally	5 totally	5 totally	3	4	4	3	1 not at all true	3	3	3	3	3	3	2	2	1	3	3	3	4	5	4	2	4	1	4	1	3
2024/01/30 2:53:17 PM CET	Nurse	Female	Sala operatoria	> 20	Worker	56-60	Married/in a relationship	2-3 times per week	3	2	1 never	1 never	3	2	4	3	4	2	2	3	3	3	2	2	3	3	3	3	2	3	2	4	4	1	3	5	4	1	4	2	3
2024/01/30 2:53:49 PM CET	Physician	Male	Internal medicine	6-10	manager	35-40	Single	0-1 times per week	4	2	2 seldom	2 seldom	4	4	5 totally	4	3	5 totally true	4	3	4	3	2	3	3	4	3	3	2	2	2	5	4	4	4	5	3	4	3	3	3
2024/01/30 2:54:01 PM CET	worker	Female	tutti settori	16-20	Worker	46-50	Single	0-1 times per week	3	1 not at all	3 sometimes	1 never	2	1 not at all	2	1 not at all	1 not at all	2	2	1 not at all true	1 not at all true	3	2	2	2	3	4	4	3	2	2	4	5	4	5	3	2	3	4	1	2
2024/01/30 2:54:45 PM CET	Physician	Female	Internal medicine	> 20	Executive	51-55	Married/in a relationship	2-3 times per week	3	4	4 often	3 sometimes	5 totally	4	5 totally	4	4	3	5 totally true	4	5 totally true	3	3	2	3	2	2	4	3	2	3	4	5	2	3	2	3	2	5	2	4
2024/01/30 2:55:33 PM CET	Nurse	Male	Anaesthesia	16-20	manager	41-45	Married/in a relationship	0-1 times per week	2	3	2 seldom	1 never	4	4	4	4	3	3	3	3	3	4	4	4	4	3	4	4	4	4	4	3	5	1	5	3	5	2	5	2	4
2024/01/30 2:59:36 PM CET	Impiegata	Female	Hospitality	11-15	Worker	56-60	Married/in a relationship	0-1 times per week	2	3	3 sometimes	1 never	3	3	2	3	3	1 not at all true	1 not at all true	2	1 not at all true	2	4	3	3	3	3	3	2	4	3	5	5	5	4	3	5	3	4	3	4
2024/01/30 3:00:53 PM CET	Nurse	Male	Internal medicine	11-15	manager	31-35	Married/in a relationship	4-5 times per week	4	1 not at all	1 never	1 never	4	4	5 totally	5 totally	3	3	4	3	4	4	4	4	4	4	4	4	4	4	4	4	5	4	4	4	3	2	4	1	2
2024/01/30 3:04:27 PM CET	Physician	Female	Outpatient	> 20	Executive	51-55	Single	4-5 times per week	4	5 totally	3 sometimes	1 never	4	4	5 totally	4	3	3	3	2	2	3	4	3	4	4	3	3	4	4	3	4	5	2	4	1	5	4	4	2	4
2024/01/30 3:08:25 PM CET	Nurse	Female	Anaesthesia	11-15	manager	56-60	Married/in a relationship	0-1 times per week	2	1 not at all	1 never	1 never	1 not at all	1 not at all	1 not at all	3	3	1 not at all true	1 not at all true	1 not at all true	1 not at all true	3	3	2	4	3	3	3	4	4	3	3	5	1	3	3	4	4	5	3	4
2024/01/30 3:12:49 PM CET	Nurse	Male	Internal medicineenterologia	11-15	Worker	31-35	Single	2-3 times per week	2	4	1 never	1 never	4	4	4	4	3	3	3	3	3	4	4	4	4	4	4	4	4	4	4	5	5	5	5	3	5	5	5	5	5
2024/01/30 3:16:14 PM CET	Physician	Male	Intensive care medicine	> 20	Executive	51-55	Married/in a relationship	0-1 times per week	4	3	1 never	1 never	4	5 totally	4	5 totally	4	4	5 totally true	4	5 totally true	4	3	3	4	4	4	4	3	3	4	5	5	4	5	4	2	2	5	2	2
2024/01/30 3:20:03 PM CET	Nurse	Female	Neurosurgery	6-10	manager	41-45	Single	0-1 times per week	3	5 totally	3 sometimes	2 seldom	2	2	3	5 totally	4	3	4	1 not at all true	2	3	4	3	3	3	4	2	4	4	3	3	5	4	3	3	4	3	3	4	5
2024/01/30 3:20:11 PM CET	Physician	Female	Internal medicine	11-15	Executive	41-45	Married/in a relationship	2-3 times per week	3	2	3 sometimes	1 never	5 totally	5 totally	5 totally	5 totally	3	5 totally true	5 totally true	5 totally true	4	4	4	2	4	4	3	4	4	4	4	5	5	1	4	1	4	3	5	3	4
2024/01/30 3:22:39 PM CET	Nurse	Female	internal medicine	11-15	manager	35-40	Married/in a relationship	0-1 times per week	4	3	2 seldom	2 seldom	4	4	4	3	4	3	3	3	3	3	3	2	3	3	3	3	2	3	3	4	5	5	4	3	2	3	5	2	3
2024/01/30 3:22:40 PM CET	Nurse	Female	Emergency medicine	0-5	Worker	26-30	Single	0-1 times per week	1 not at all	1 not at all	1 never	1 never	5 totally	4	4	4	2	3	3	2	2	4	3	1	2	1	2	3	2	2	3	5	4	5	2	5	1	2	3	3	1
2024/01/30 3:24:36 PM CET	Technician	Male	Tecnical sector	16-20	Worker	46-50	Married/in a relationship	0-1 times per week	3	2	3 sometimes	3 sometimes	3	3	4	4	4	2	3	1 not at all true	1 not at all true	3	4	2	3	3	4	3	3	3	3	4	4	2	4	4	3	2	4	1	3
2024/01/30 3:25:24 PM CET	Administrative sector worker	Female	Surgery	0-5	Worker	31-35	Married/in a relationship	0-1 times per week	4	3	4 often	3 sometimes	4	4	5 totally	4	4	3	3	4	3	3	2	3	4	2	3	3	3	4	2	4	5	2	4	3	2	1	4	2	4
2024/01/30 3:33:12 PM CET	Nurse	Female	Surgery	6-10	Worker	31-35	Married/in a relationship	0-1 times per week	3	2	1 never	1 never	5 totally	5 totally	5 totally	4	4	4	4	4	4	3	4	2	4	3	4	3	3	4	3	2	5	1	4	3	5	1	5	2	4
2024/01/30 3:34:31 PM CET	Nurse	Female	Intensive care medicine	> 20	manager	51-55	Married/in a relationship	2-3 times per week	3	2	3 sometimes	1 never	4	4	5 totally	5 totally	3	3	2	3	3	4	3	1	2	2	3	3	2	3	2	4	5	4	3	3	3	2	4	2	3
2024/01/30 3:37:40 PM CET	Nurse	Female	internal medicine	11-15	Worker	35-40	Married/in a relationship	0-1 times per week	2	1 not at all	1 never	1 never	5 totally	4	5 totally	4	3	4	4	4	4	4	2	2	2	2	4	3	2	4	3	5	5	2	4	4	3	3	5	4	3
2024/01/30 3:44:21 PM CET	Administrative sector worker	Female	Internal medicine	0-5	Worker	35-40	Single	0-1 times per week	4	3	1 never	1 never	5 totally	5 totally	5 totally	4	4	2	2	2	4	3	3	3	3	3	4	3	3	3	3	4	4	3	4	3	3	2	3	2	3
2024/01/30 3:49:03 PM CET	Physician	Male	Surgery	> 20	manager	56-60	Married/in a relationship	0-1 times per week	3	2	1 never	1 never	4	4	4	4	2	3	2	2	2	4	3	4	4	4	4	4	3	4	3	3	5	2	4	1	5	2	5	3	5
2024/01/30 3:53:10 PM CET	Technician	Female	Technical sector	6-10	Worker	26-30	Married/in a relationship	2-3 times per week	2	1 not at all	1 never	1 never	4	3	3	4	2	4	4	5 totally true	5 totally true	3	2	2	4	2	2	3	3	3	3	4	5	2	4	5	3	4	4	4	3
2024/01/30 3:55:29 PM CET	Nurse	Female	Internal medicine	16-20	executive	41-45	Married/in a relationship	0-1 times per week	3	1 not at all	1 never	1 never	4	4	4	4	4	4	3	4	4	4	3	3	3	3	3	2	2	3	3	4	5	3	3	2	5	3	5	3	3
2024/01/30 3:57:49 PM CET	Nurse	Male	Anaesthesia	11-15	manager	35-40	Married/in a relationship	2-3 times per week	3	1 not at all	1 never	1 never	4	3	4	5 totally	1 not at all	3	3	2	2	4	4	4	4	4	4	4	3	4	3	3	5	2	4	3	5	2	5	4	2
2024/01/30 4:07:42 PM CET	Nurse	Female	Outpatient	16-20	Worker	41-45	Married/in a relationship	0-1 times per week	3	1 not at all	1 never	1 never	3	3	4	3	2	2	1 not at all true	1 not at all true	4	3	3	1	0	0	1	2	2	3	3	4	4	5	5	3	5	2	4	3	3
2024/01/30 4:12:11 PM CET	Nurse	Female	Dialisi	> 20	Worker	51-55	Single	0-1 times per week	4	2	1 never	1 never	4	4	4	2	4	3	4	2	2	4	4	4	4	3	4	4	4	4	4	3	5	5	5	1	5	2	5	1	5
2024/01/30 4:14:03 PM CET	Hospitality staff	Male	Hospitality	16-20	worker	>60	Single	0-1 times per week	2	1 not at all	1 never	1 never	3	3	3	4	3	1 not at all true	1 not at all true	2	1 not at all true	4	3	2	2	3	3	3	3	4	4	3	5	1	4	1	4	1	5	2	3
2024/01/30 4:14:33 PM CET	Hospitality staff	Female	Hospitality	11-15	Worker	41-45	Married/in a relationship	2-3 times per week	5 totally	5 totally	4 often	3 sometimes	4	4	4	4	5 totally	4	3	5 totally true	4	4	4	4	4	4	4	4	4	4	4	3	5	1	5	1	5	1	5	2	3
2024/01/30 4:18:30 PM CET	Administrative sector worker	Female	internal medicine	6-10	Worker	26-30	Married/in a relationship	0-1 times per week	3	2	2 seldom	1 never	3	3	3	3	2	3	3	5 totally true	4	3	3	2	3	2	3	4	2	3	2	5	4	3	3	2	2	3	5	3	3
2024/01/30 4:25:08 PM CET	Technician	Male	Tecnical sector	0-5	Worker	26-30	Single	2-3 times per week	3	3	1 never	1 never	4	4	4	3	3	1 not at all true	1 not at all true	3	3	3	3	2	3	3	3	3	2	2	2	3	4	4	3	5	3	4	4	3	3
2024/01/30 4:27:21 PM CET	Physician	Female	Surgery	0-5	Worker	31-35	Married/in a relationship	2-3 times per week	1 not at all	1 not at all	3 sometimes	2 seldom	4	3	3	3	2	3	2	2	3	3	4	4	4	3	4	3	4	4	4	3	4	2	3	2	5	2	4	2	3
2024/01/30 4:27:47 PM CET	Nurse	Female	Internal medicine	6-10	Worker	26-30	Single	2-3 times per week	3	2	1 never	1 never	3	3	4	4	4	3	4	5 totally true	5 totally true	2	3	2	3	4	3	3	2	3	2	3	4	1	3	2	4	3	5	5	4
2024/01/30 4:32:19 PM CET	Nurse	Female	Emergency medicine	6-10	manager	31-35	Married/in a relationship	2-3 times per week	4	2	1 never	1 never	3	3	3	2	3	2	2	1 not at all true	1 not at all true	2	3	2	3	3	3	3	1	4	3	3	4	2	2	3	3	3	4	4	4
2024/01/30 4:38:22 PM CET	TRM	Female	Services	> 20	TRM referente	56-60	Married/in a relationship	0-1 times per week	2	4	3 sometimes	1 never	4	4	4	4	4	3	2	1 not at all true	2	4	3	3	2	3	3	2	3	4	3	4	5	1	4	1	4	1	5	3	4
2024/01/30 4:46:48 PM CET	Technician	Female	Services	> 20	Referente TRM	41-45	Married/in a relationship	0-1 times per week	2	1 not at all	1 never	1 never	5 totally	5 totally	5 totally	3	4	4	3	5 totally true	5 totally true	2	2	1	2	2	3	3	2	2	1	2	4	5	3	3	5	3	5	4	3
2024/01/30 4:48:02 PM CET	Nurse	Female	Internal medicine	0-5	Worker	35-40	Married/in a relationship	0-1 times per week	2	1 not at all	2 seldom	2 seldom	4	3	3	3	3	4	3	2	3	4	3	2	3	4	3	2	4	4	3	3	5	2	4	3	5	2	4	1	3
2024/01/30 4:49:04 PM CET	Technician	Female	Technical sector	> 20	Worker	51-55	Married/in a relationship	more than 5 times per week	4	4	4 often	1 never	4	3	3	4	4	4	2	2	2	4	4	4	4	3	4	4	3	4	3	1	5	2	4	4	5	1	4	2	3
2024/01/30 4:49:24 PM CET	Physician	Female	Internal medicine	0-5	manager	41-45	Married/in a relationship	2-3 times per week	3	4	1 never	1 never	4	4	4	4	3	3	3	4	4	3	3	3	3	2	3	3	3	3	3	3	4	3	3	4	4	3	4	3	4
2024/01/30 4:54:04 PM CET	Nurse	Female	Intensive care medicine	6-10	manager	31-35	Married/in a relationship	0-1 times per week	4	1 not at all	1 never	1 never	4	4	4	4	5 totally	3	2	2	2	4	2	2	2	3	4	4	2	3	2	2	5	2	4	3	5	2	5	3	3
2024/01/30 5:07:36 PM CET	Nurse	Female	Outpatient	16-20	manager	46-50	Married/in a relationship	2-3 times per week	2	2	3 sometimes	2 seldom	2	2	1 not at all	4	3	1 not at all true	1 not at all true	1 not at all true	1 not at all true	3	4	4	4	4	4	4	4	4	2	2	5	1	4	3	5	3	5	4	3
2024/01/30 5:08:37 PM CET	Internal s	Male	Services	> 20	Capo Services	56-60	Married/in a relationship	2-3 times per week	3	3	2 seldom	1 never	3	3	3	3	3	2	1 not at all true	1 not at all true	2	3	3	3	2	2	3	3	3	2	3	4	5	1	4	2	4	2	4	3	3
2024/01/30 5:17:58 PM CET	Physician	Female	Internal medicine	> 20	Executive	51-55	Married/in a relationship	0-1 times per week	5 totally	5 totally	1 never	1 never	5 totally	5 totally	5 totally	4	5 totally	5 totally true	5 totally true	5 totally true	5 totally true	4	4	4	4	4	4	4	1	4	4	1	5	1	5	1	3	1	5	3	5
2024/01/30 5:20:16 PM CET	Nurse	Female	Internal medicine	16-20	Worker	41-45	Married/in a relationship	2-3 times per week	3	3	5 very often	5 very often	5 totally	5 totally	5 totally	3	3	4	4	5 totally true	5 totally true	4	4	3	4	4	4	4	3	4	3	3	3	1	4	2	4	2	5	3	5
2024/01/30 5:25:23 PM CET	Nurse	Female	Internal medicine	> 20	Worker	56-60	Single	0-1 times per week	1 not at all	3	3 sometimes	1 never	4	4	4	3	3	4	4	4	4	3	1	1	2	2	3	2	3	2	3	5	4	1	3	3	3	2	4	2	3
2024/01/30 5:26:07 PM CET	Nurse	Female	Surgery	0-5	Worker	26-30	Married/in a relationship	2-3 times per week	3	1 not at all	4 often	4 often	4	5 totally	5 totally	3	3	4	3	3	3	4	3	3	4	4	3	4	3	3	4	2	5	3	3	1	3	2	4	2	5
2024/01/30 5:29:45 PM CET	Hospitality staff	Female	Hospitality	16-20	Worker	46-50	Single	4-5 times per week	3	4	2 seldom	1 never	2	2	2	3	2	1 not at all true	1 not at all true	2	1 not at all true	3	3	3	3	3	2	2	2	3	3	3	3	1	1	2	2	2	3	1	2
2024/01/30 5:34:41 PM CET	Nurse	Male	Surgery	11-15	Worker	31-35	Single	2-3 times per week	1 not at all	2	1 never	1 never	3	2	2	3	1 not at all	2	2	2	2	4	4	3	4	2	1	3	3	4	2	4	4	1	3	1	5	2	2	2	4
2024/01/30 5:38:19 PM CET	Nurse	Female	Emergency medicine	11-15	manager	51-55	Married/in a relationship	2-3 times per week	3	3	3 sometimes	3 sometimes	4	4	4	3	2	2	2	2	2	3	3	2	3	3	3	3	3	3	3	3	4	4	3	2	2	3	4	3	4
2024/01/30 5:42:31 PM CET	Physician	Male	Otorinolaringoiatria	> 20	Executive	56-60	Married/in a relationship	2-3 times per week	4	4	1 never	1 never	4	3	4	4	3	2	3	2	4	4	4	4	4	4	4	4	4	4	4	5	5	3	4	1	5	2	5	4	3
2024/01/30 5:44:34 PM CET	Physician	Female	Anaesthesia	16-20	Executive	46-50	Married/in a relationship	2-3 times per week	4	2	1 never	1 never	4	4	4	4	4	2	2	2	2	2	1	1	3	3	3	2	1	2	1	4	5	2	2	5	2	2	4	3	1
2024/01/30 5:47:32 PM CET	Tecnico di sala operatoria	Female	Anaesthesia	6-10	Worker	31-35	Married/in a relationship	0-1 times per week	2	1 not at all	2 seldom	1 never	4	4	4	3	4	2	2	2	2	3	3	4	3	2	3	4	3	3	3	2	4	3	3	4	5	2	4	3	4
2024/01/30 5:49:49 PM CET	Physician	Female	Surgery	6-10	Manager	31-35	Single	0-1 times per week	1 not at all	2	2 seldom	1 never	3	4	4	4	1 not at all	3	4	4	4	3	2	2	3	2	2	3	2	3	3	5	5	2	3	2	3	4	4	3	4
2024/01/30 5:52:07 PM CET	Nurse	Female	Surgery	11-15	Worker	35-40	Married/in a relationship	0-1 times per week	1 not at all	1 not at all	2 seldom	1 never	3	3	3	3	3	2	2	3	3	4	3	3	3	3	3	2	2	3	3	3	4	4	3	4	5	1	5	2	3
2024/01/30 5:53:40 PM CET	Technician	Female	Services	> 20	Worker	51-55	Married/in a relationship	4-5 times per week	3	1 not at all	4 often	3 sometimes	4	4	4	5 totally	4	4	3	4	4	3	3	2	1	1	3	2	3	3	3	3	4	3	2	2	3	3	4	2	3
2024/01/30 5:55:39 PM CET	Nurse	Female	Anaesthesia	> 20	Worker	56-60	Married/in a relationship	0-1 times per week	1 not at all	3	2 seldom	1 never	2	2	2	3	2	2	2	2	2	3	3	2	3	4	3	4	3	4	3	3	5	2	2	4	5	2	5	3	4
2024/01/30 6:01:58 PM CET	Administrative sector worker	Male	Administration	6-10	Executive	46-50	Married/in a relationship	2-3 times per week	3	1 not at all	1 never	1 never	4	4	4	4	3	3	3	2	4	3	1	4	4	3	3	3	4	2	4	3	3	2	5	2	5	1	3	1	4
2024/01/30 6:25:33 PM CET	Nurse	Female	Anaesthesia	> 20	manager	56-60	Single	2-3 times per week	2	3	2 seldom	1 never	3	4	4	3	3	3	3	2	3	3	3	2	3	3	2	3	2	2	2	4	4	3	3	3	3	3	4	2	4
2024/01/30 6:28:30 PM CET	Nurse	Male	Surgery	16-20	Worker	51-55	Single	0-1 times per week	3	1 not at all	1 never	1 never	3	4	3	2	2	2	2	1 not at all true	1 not at all true	4	4	3	3	3	4	3	1	4	3	3	5	1	4	5	5	2	5	4	3
2024/01/30 7:26:44 PM CET	Nurse	Female	Internal medicine	16-20	executive	41-45	Single	0-1 times per week	2	2	4 often	4 often	2	2	2	4	2	3	3	3	1 not at all true	3	4	4	4	3	3	3	3	4	3	3	4	3	4	2	4	3	4	3	5
2024/01/30 7:38:30 PM CET	Physician	Male	Anaesthesia	11-15	Executive	41-45	Single	2-3 times per week	2	3	1 never	1 never	4	4	4	4	2	3	3	2	2	4	3	4	3	4	2	3	3	3	2	3	5	1	4	2	4	2	5	3	5
2024/01/30 7:42:54 PM CET	Nurse	Female	Emergency medicine	11-15	manager	35-40	Married/in a relationship	more than 5 times per week	3	2	3 sometimes	1 never	2	2	2	1 not at all	3	5 totally true	2	1 not at all true	1 not at all true	3	3	2	1	2	2	2	2	3	2	3	4	1	2	2	3	3	4	4	4
2024/01/30 7:49:26 PM CET	Nurse	Female	Intensive care medicine	16-20	nessun ruolo	35-40	Married/in a relationship	2-3 times per week	2	3	1 never	1 never	3	3	2	4	1 not at all	3	3	2	2	4	2	2	4	3	3	1	2	4	2	2	4	3	1	5	5	3	3	4	3
2024/01/30 8:15:43 PM CET	Nurse	Female	Emergency medicine	16-20	manager	41-45	Married/in a relationship	0-1 times per week	2	1 not at all	1 never	1 never	3	3	3	3	3	2	2	1 not at all true	2	3	2	1	3	2	2	2	2	3	3	4	4	2	3	3	4	2	4	1	2
2024/01/30 8:27:56 PM CET	Nurse	Female	Intensive care medicine	I > 20	manager	56-60	Married/in a relationship	0-1 times per week	3	3	2 seldom	1 never	4	4	4	3	4	4	4	3	4	3	3	3	3	3	3	3	3	3	3	3	4	1	3	3	4	3	4	3	3
2024/01/30 8:43:54 PM CET	Physician	Male	Surgery	11-15	Executive	51-55	Married/in a relationship	more than 5 times per week	3	2	4 often	4 often	4	4	4	5 totally	2	3	4	3	3	4	4	3	4	4	4	3	3	4	4	4	5	2	4	2	2	2	5	2	4
2024/01/30 8:52:12 PM CET	Nurse	Female	Surgery e ostetricia	16-20	manager	46-50	Married/in a relationship	0-1 times per week	3	3	2 seldom	2 seldom	4	4	4	3	3	3	2	3	2	2	2	2	2	3	3	2	3	3	3	3	4	3	4	2	2	2	3	2	3
2024/01/30 10:08:12 PM CET	Nurse	Female	Surgery	11-15	Worker	31-35	Married/in a relationship	0-1 times per week	3	1 not at all	2 seldom	1 never	4	4	4	4	4	4	4	5 totally true	5 totally true	2	2	2	2	2	3	2	2	2	2	4	5	4	3	4	4	3	4	4	4
2024/01/30 10:33:59 PM CET	Trasporti e logistica	Male	Trasporti e logistica	11-15	Worker	>60	Married/in a relationship	2-3 times per week	5 totally	5 totally	4 often	3 sometimes	1 not at all	1 not at all	2	2	5 totally	1 not at all true	1 not at all true	1 not at all true	1 not at all true	4	4	4	4	4	3	3	4	4	4	4	5	5	5	4	5	3	5	3	5
2024/01/30 10:40:47 PM CET	Physician	Male	Emergency medicine	0-5	Worker	31-35	Single	2-3 times per week	3	2	2 seldom	2 seldom	4	4	4	4	3	4	5 totally true	5 totally true	3	3	4	4	4	4	4	4	3	4	4	5	5	2	4	2	3	4	4	2	3
2024/01/30 10:43:55 PM CET	Nurse	Female	Acuto minore intensità	0-5	Worker	41-45	Single	2-3 times per week	2	3	1 never	2 seldom	4	4	5 totally	5 totally	4	4	4	4	4	3	3	4	2	4	4	3	4	4	3	3	5	2	4	4	5	1	4	2	4
2024/01/30 10:47:09 PM CET	Nurse	Female	Internal medicine	6-10	Worker	46-50	Single	0-1 times per week	4	3	5 very often	5 very often	4	4	4	3	3	3	3	5 totally true	5 totally true	4	4	3	3	3	2	2	4	4	3	4	4	3	3	2	3	1	4	2	4
2024/01/30 11:02:14 PM CET	Physician	Male	Surgery	6-10	manager	31-35	Single	0-1 times per week	1 not at all	1 not at all	1 never	1 never	3	3	2	3	1 not at all	4	4	4	3	4	4	2	4	3	3	3	2	3	3	4	4	2	3	4	1	2	4	3	3
2024/01/30 11:15:46 PM CET	Nurse	Female	Internal medicine	16-20	manager	35-40	Married/in a relationship	0-1 times per week	3	5 totally	3 sometimes	1 never	3	3	4	2	3	2	2	3	5 totally true	4	4	4	4	4	4	4	4	4	4	1	5	1	5	1	5	1	5	1	4
2024/01/30 11:29:06 PM CET	Nurse	Male	Administration	11-15	executive	31-35	Married/in a relationship	4-5 times per week	3	1 not at all	2 seldom	3 sometimes	4	4	3	3	3	3	3	3	3	3	3	3	3	3	3	3	3	3	3	5	4	3	3	4	3	3	3	3	3
2024/01/30 11:59:05 PM CET	Physician	Female	Internal medicine	0-5	Executive	26-30	Married/in a relationship	0-1 times per week	2	4	1 never	1 never	5 totally	4	5 totally	3	2	3	4	5 totally true	4	4	2	2	4	2	3	3	1	3	4	5	5	2	2	3	2	2	5	1	4
2024/01/31 12:17:22 AM CET	Nurse	Female	Services	0-5	Worker	35-40	Married/in a relationship	0-1 times per week	1 not at all	2	1 never	1 never	3	3	2	3	2	2	2	2	2	3	4	2	4	2	3	3	4	4	4	4	4	5	4	3	5	2	4	3	4
2024/01/31 12:49:49 AM CET	Nurse	Male	Intensive care medicine	I > 20	manager	56-60	Married/in a relationship	0-1 times per week	2	5 totally	4 often	1 never	4	4	4	4	3	4	2	2	2	3	3	2	4	3	3	3	3	3	3	4	4	3	4	3	3	2	4	1	4
2024/01/31 1:09:39 AM CET	Nurse	Male	Internal medicine	I > 20	Worker	56-60	Married/in a relationship	0-1 times per week	3	1 not at all	1 never	1 never	1 not at all	3	1 not at all	3	1 not at all	2	1 not at all true	3	1 not at all true	4	3	1	3	4	2	2	3	2	3	3	3	1	3	1	4	3	3	4	2
2024/01/31 1:18:27 AM CET	Nurse	Female	Surgery	0-5	Worker	18-25	Single	0-1 times per week	3	1 not at all	3 sometimes	3 sometimes	5 totally	5 totally	5 totally	3	3	4	4	5 totally true	5 totally true	4	4	2	4	4	4	4	3	4	4	4	5	1	4	5	4	3	4	2	3
2024/01/31 1:39:29 AM CET	Nurse	Female	Surgery	0-5	Worker	26-30	Married/in a relationship	2-3 times per week	3	2	5 very often	4 often	3	3	4	3	2	3	1 not at all true	2	2	3	3	3	3	3	4	2	3	3	3	3	4	4	3	2	5	2	4	3	4
2024/01/31 1:51:22 AM CET	Nurse	Male	Surgery	0-5	Worker	26-30	Single	2-3 times per week	1 not at all	3	1 never	1 never	2	2	4	3	3	1 not at all true	1 not at all true	4	3	4	2	2	3	2	3	4	4	3	2	5	5	4	4	2	3	3	4	3	3
2024/01/31 2:33:25 AM CET	Hospitality staff	Male	Hospitality	11-15	Worker	51-55	Married/in a relationship	0-1 times per week	3	5 totally	1 never	1 never	4	4	3	4	5 totally	1 not at all true	1 not at all true	1 not at all true	1 not at all true	4	4	3	4	2	4	4	2	4	3	5	5	3	5	3	5	2	5	1	1
2024/01/31 3:28:30 AM CET	Nurse	Female	Administration	6-10	executive	51-55	Married/in a relationship	2-3 times per week	3	1 not at all	1 never	1 never	4	4	5 totally	3	2	2	1 not at all true	1 not at all true	1 not at all true	4	3	4	4	3	3	3	3	3	3	4	4	2	3	2	4	3	4	3	4
2024/01/31 5:06:48 AM CET	Hospitality staff	Female	Hospitality	0-5	Worker	35-40	Single	2-3 times per week	2	1 not at all	1 never	1 never	3	3	3	3	2	2	1 not at all true	1 not at all true	2	3	2	1	1	1	1	1	1	2	1	3	3	3	2	4	2	2	4	2	3
2024/01/31 6:31:14 AM CET	Hospitality staff	Female	Hospitality	0-5	Cuoca	51-55	Married/in a relationship	0-1 times per week	4	5 totally	1 never	1 never	3	3	1 not at all	5 totally	4	4	2	5 totally true	1 not at all true	3	3	3	3	3	3	3	4	4	3	4	5	1	2	3	4	1	4	1	4
2024/01/31 6:52:45 AM CET	Nurse	Male	Intensive care medicine	11-15	Worker	35-40	Married/in a relationship	0-1 times per week	1 not at all	1 not at all	1 never	1 never	3	3	3	3	2	2	2	1 not at all true	1 not at all true	1	2	2	3	2	3	3	3	3	3	4	5	3	3	3	3	3	3	3	3
2024/01/31 7:19:04 AM CET	Physician	Male	Emergency medicine	16-20	Manager	51-55	Married/in a relationship	0-1 times per week	3	3	1 never	2 seldom	4	4	5 totally	4	3	5 totally true	4	5 totally true	5 totally true	3	4	4	3	4	3	4	3	3	3	4	5	3	2	4	4	3	5	2	5
2024/01/31 7:21:44 AM CET	Nurse	Female	Internal medicine	11-15	Worker	35-40	Married/in a relationship	0-1 times per week	1 not at all	4	2 seldom	1 never	2	1 not at all	1 not at all	1 not at all	3	5 totally true	4	5 totally true	1 not at all true	4	4	4	4	4	4	2	3	4	3	1	4	4	4	1	5	1	5	2	5
2024/01/31 8:15:34 AM CET	Administrative sector worker	Female	Administration	6-10	Worker	51-55	Married/in a relationship	0-1 times per week	3	3	1 never	1 never	4	4	4	4	2	1 not at all true	1 not at all true	1 not at all true	1 not at all true	4	3	2	3	3	2	3	2	3	3	4	5	2	3	1	5	1	4	2	4
2024/01/31 8:25:57 AM CET	Administrative sector worker	Female	Administration	6-10	Worker	31-35	Single	2-3 times per week	5 totally	1 not at all	3 sometimes	4 often	3	3	4	4	4	2	2	1 not at all true	1 not at all true	3	3	3	4	3	4	2	4	4	3	1	5	2	4	1	5	3	4	4	4
2024/01/31 8:34:11 AM CET	Physician	Male	Services	0-5	Manager	31-35	Married/in a relationship	0-1 times per week	3	2	3 sometimes	3 sometimes	5 totally	5 totally	5 totally	4	3	4	2	5 totally true	3	4	4	3	4	4	4	4	4	4	3	4	5	1	4	1	4	3	4	1	4
2024/01/31 8:35:30 AM CET	Nurse	Female	Anaesthesia	I > 20	Worker	46-50	Married/in a relationship	more than 5 times per week	4	1 not at all	1 never	1 never	5 totally	5 totally	5 totally	4	5 totally	3	3	5 totally true	5 totally true	2	4	3	4	4	4	3	4	4	3	1	5	1	5	1	5	1	5	4	3
2024/01/31 8:46:02 AM CET	Physician	Female	Internal medicine	I > 20	Manager	46-50	Married/in a relationship	0-1 times per week	2	5 totally	2 seldom	1 never	2	2	3	4	3	1 not at all true	1 not at all true	1 not at all true	2	4	3	2	3	2	2	2	2	3	2	4	5	1	3	1	2	4	4	1	5
2024/01/31 8:49:51 AM CET	Nurse	Male	Intensive care medicine	16-20	manager	41-45	Married/in a relationship	0-1 times per week	2	2	1 never	1 never	3	3	3	3	2	3	2	2	2	2	1	3	1	1	2	1	1	2	3	4	4	4	4	4	4	2	4	2	3
2024/01/31 8:51:31 AM CET	Administrative sector worker	Male	Administration	0-5	Worker	18-25	Single	0-1 times per week	3	1 not at all	1 never	1 never	5 totally	4	5 totally	4	3	4	4	5 totally true	3	3	3	4	3	4	4	3	2	3	4	2	5	2	4	4	4	1	4	2	3
2024/01/31 9:10:13 AM CET	Physician	Female	Internal medicine	0-5	Worker	26-30	Single	0-1 times per week	3	1 not at all	1 never	1 never	4	4	4	3	2	2	4	3	2	3	3	2	3	3	2	3	3	3	3	5	4	3	3	3	2	2	4	3	2
2024/01/31 9:14:07 AM CET	Administrative sector worker	Female	Administration	I > 20	Worker	56-60	Married/in a relationship	0-1 times per week	1 not at all	1 not at all	1 never	1 never	4	4	3	4	4	1 not at all true	1 not at all true	3	1 not at all true	4	4	3	4	3	3	3	3	4	3	2	5	2	3	2	5	4	5	4	4
2024/01/31 9:20:29 AM CET	Technician	Female	Technical sector	16-20	Tecnico in analisi biomediche	35-40	Married/in a relationship	2-3 times per week	3	2	2 seldom	1 never	3	3	3	3	3	2	2	2	2	3	3	2	3	3	2	2	2	2	2	2	3	4	3	2	4	2	3	4	3
2024/01/31 9:28:13 AM CET	Nurse	Female	Neurosurgery	6-10	Worker	26-30	Married/in a relationship	2-3 times per week	2	3	2 seldom	1 never	3	3	2	1 not at all	2	1 not at all true	1 not at all true	2	2	2	2	3	2	2	1	3	3	3	3	2	5	1	4	2	5	2	4	2	4
2024/01/31 9:35:44 AM CET	Technician	Female	Technical sector	16-20	Worker	41-45	Married/in a relationship	0-1 times per week	3	1 not at all	2 seldom	1 never	3	3	3	3	3	3	3	3	2	3	3	3	2	3	3	2	3	3	2	4	4	2	4	3	3	2	4	1	3
2024/01/31 9:43:34 AM CET	Nurse	Female	services	0-5	Worker	18-25	Single	0-1 times per week	2	2	1 never	1 never	3	4	3	1 not at all	2	2	2	4	3	4	2	1	4	0	4	3	1	3	4	2	4	4	3	5	5	3	3	3	4
2024/01/31 9:51:46 AM CET	Administrative sector worker	Male	Administration	6-10	Executive	41-45	Married/in a relationship	0-1 times per week	4	1 not at all	1 never	1 never	4	4	4	4	4	4	4	4	4	4	3	3	3	3	3	3	3	3	3	4	4	3	4	3	3	2	4	3	4
2024/01/31 9:53:33 AM CET	Nurse	Female	ospedale di giorno	I > 20	Worker	51-55	Married/in a relationship	0-1 times per week	2	5 totally	2 seldom	1 never	4	4	4	3	4	2	2	2	2	1	1	1	1	1	1	1	1	1	1	4	4	3	2	2	3	3	3	3	2
2024/01/31 9:58:46 AM CET	Administrative sector worker	Female	Hospitality	6-10	Worker	41-45	Single	2-3 times per week	4	2	3 sometimes	2 seldom	4	2	3	4	4	3	3	3	4	4	4	3	3	4	4	3	4	4	3	3	5	1	4	2	5	2	4	2	4
2024/01/31 10:53:09 AM CET	Nurse	Male	Surgery	6-10	Worker	31-35	Married/in a relationship	4-5 times per week	2	1 not at all	2 seldom	1 never	3	3	3	4	3	3	2	3	3	4	4	4	4	3	4	4	0	3	3	5	5	1	5	1	4	2	4	1	5
2024/01/31 11:16:30 AM CET	Nurse	Female	Internal medicine	11-15	executive	35-40	Married/in a relationship	0-1 times per week	3	4	2 seldom	2 seldom	3	3	3	3	3	4	4	4	4	3	3	2	3	3	3	3	3	3	3	5	5	2	4	1	4	3	4	4	3
2024/01/31 11:20:02 AM CET	Segretaria medica	Female	Surgery	I > 20	Referente per la codifica	51-55	Married/in a relationship	0-1 times per week	3	1 not at all	1 never	1 never	2	1 not at all	4	5 totally	5 totally	1 not at all true	2	1 not at all true	1 not at all true	3	4	4	4	4	3	3	3	4	3	3	5	2	4	3	4	1	4	2	3
2024/01/31 11:47:48 AM CET	Technician	Female	Radioterapia macchine	I > 20	nessun grado gerarchico	>60	Single	0-1 times per week	5 totally	1 not at all	3 sometimes	1 never	4	4	4	4	4	4	2	3	3	3	3	2	4	3	3	3	4	3	3	3	5	2	4	3	4	3	5	3	3
2024/01/31 12:03:33 PM CET	ASM	Female	Otorinolaringoiatria	6-10	Worker	26-30	Married/in a relationship	2-3 times per week	3	2	1 never	1 never	4	4	4	3	4	2	2	5 totally true	4	2	3	4	3	2	4	4	4	4	3	3	5	4	4	3	4	3	5	3	4
2024/01/31 12:07:36 PM CET	Nurse	Female	Internal medicine	11-15	Worker	31-35	Married/in a relationship	4-5 times per week	2	1 not at all	1 never	1 never	4	4	4	3	3	4	4	4	4	4	2	3	3	3	3	3	3	4	3	4	5	2	4	3	5	3	5	3	3
2024/01/31 12:18:44 PM CET	Nurse	Female	Anaesthesia	16-20	manager	35-40	Married/in a relationship	2-3 times per week	4	1 not at all	3 sometimes	1 never	3	3	3	4	4	1 not at all true	1 not at all true	1 not at all true	1 not at all true	3	3	2	2	3	4	4	3	4	3	3	5	1	4	5	4	3	4	3	3
2024/01/31 12:19:09 PM CET	Nurse	Female	Cure palliative	16-20	nurse	51-55	Single	0-1 times per week	3	5 totally	1 never	1 never	4	4	3	5 totally	5 totally	4	1 not at all true	1 not at all true	5 totally true	4	4	4	1	4	4	3	4	3	3	5	5	1	4	1	4	1	5	1	1
2024/01/31 12:50:14 PM CET	Nurse	Female	Surgery e ostetricia	I > 20	executive	46-50	Married/in a relationship	0-1 times per week	3	1 not at all	1 never	1 never	4	3	3	4	2	2	4	4	4	3	3	3	3	3	2	2	2	3	3	4	4	2	3	2	3	2	4	4	4
2024/01/31 12:55:17 PM CET	Nurse	Female	Intensive care medicine	0-5	Worker	35-40	Single	2-3 times per week	1 not at all	1 not at all	3 sometimes	2 seldom	4	4	4	3	1 not at all	4	3	3	4	4	3	2	4	3	3	1	4	4	1	5	5	3	2	1	3	2	4	3	4
2024/01/31 1:12:13 PM CET	Nurse	Female	Outpatient	6-10	Worker	26-30	Single	2-3 times per week	3	1 not at all	3 sometimes	1 never	5 totally	4	4	3	4	3	3	5 totally true	4	2	3	3	4	2	3	2	2	3	2	4	4	3	2	2	5	3	3	4	4
2024/01/31 1:17:38 PM CET	Psicologo	Female	Centro Disturbi Alimentari	6-10	Psicologo	51-55	Married/in a relationship	0-1 times per week	3	2	2 seldom	2 seldom	4	3	4	3	1 not at all	2	1 not at all true	2	3	4	3	2	2	2	3	3	3	3	3	3	5	1	3	2	3	4	4	3	5
2024/01/31 1:18:40 PM CET	Technician	Female	Surgery e ostetricia	0-5	Worker	18-25	Single	2-3 times per week	3	3	1 never	1 never	2	2	2	3	3	1 not at all true	1 not at all true	1 not at all true	1 not at all true	3	2	2	2	3	3	2	2	3	3	4	4	3	3	3	3	2	4	3	1
2024/01/31 1:25:47 PM CET	Nurse	Female	Anaesthesia	I > 20	manager	51-55	Single	0-1 times per week	4	3	3 sometimes	4 often	4	4	4	4	4	3	2	1 not at all true	2	3	4	4	3	2	3	2	4	4	3	4	5	2	4	2	4	2	4	2	3
2024/01/31 1:33:20 PM CET	Nurse	Male	Anaesthesia	16-20	manager	46-50	Married/in a relationship	2-3 times per week	2	1 not at all	2 seldom	2 seldom	4	3	4	4	3	3	3	2	2	4	4	3	3	4	3	4	4	4	4	3	5	4	5	4	5	3	5	3	5
2024/01/31 1:50:30 PM CET	Nurse	Female	Outpatient	I > 20	manager	56-60	Married/in a relationship	2-3 times per week	4	1 not at all	1 never	1 never	3	3	3	4	4	4	4	3	3	3	4	3	3	4	3	2	4	3	3	4	4	1	4	2	4	3	4	3	4
2024/01/31 1:50:52 PM CET	terapista	Female	tutti	6-10	worker	35-40	Married/in a relationship	2-3 times per week	1 not at all	3	2 seldom	1 never	5 totally	5 totally	5 totally	2	1 not at all	2	2	4	3	3	3	4	4	4	4	3	2	4	4	5	4	4	4	2	5	2	4	4	5
2024/01/31 1:53:02 PM CET	terapista	Female	tutti	6-10	worker	26-30	Married/in a relationship	0-1 times per week	1 not at all	1 not at all	1 never	1 never	4	5 totally	5 totally	2	3	2	2	2	3	4	4	2	2	3	4	3	3	4	2	4	5	4	2	2	5	5	4	5	4
2024/01/31 2:22:21 PM CET	Administrative sector worker	Female	Emergency medicine	16-20	Worker	46-50	Married/in a relationship	0-1 times per week	2	1 not at all	1 never	1 never	5 totally	5 totally	5 totally	4	4	3	5 totally true	5 totally true	5 totally true	4	4	4	4	4	4	4	4	4	4	4	5	1	5	3	5	1	5	2	5
2024/01/31 2:51:29 PM CET	Nurse	Female	Internal medicine	0-5	Worker	18-25	Single	2-3 times per week	3	4	1 never	1 never	4	4	4	4	2	4	4	5 totally true	4	2	3	2	1	3	3	4	2	2	3	5	4	1	4	5	4	1	4	3	3
2024/01/31 2:57:13 PM CET	Nurse	Female	Surgery	I > 20	Worker	56-60	Married/in a relationship	2-3 times per week	3	3	2 seldom	2 seldom	4	4	4	4	4	3	3	3	3	3	3	3	3	3	3	3	3	3	3	4	5	1	4	1	4	1	4	1	4
2024/01/31 3:08:02 PM CET	Nurse	Female	Internal medicine e ortointernal medicine	16-20	manager	41-45	Married/in a relationship	0-1 times per week	3	3	3 sometimes	1 never	4	4	2	2	2	1 not at all true	2	2	3	3	3	3	3	3	3	3	3	3	4	5	5	1	5	4	3	1	5	1	4
2024/01/31 3:26:52 PM CET	Nurse	Female	Anaesthesia	6-10	manager	31-35	Single	2-3 times per week	2	3	3 sometimes	3 sometimes	3	3	3	3	3	4	3	4	3	3	3	2	3	3	3	3	3	3	3	4	5	2	3	2	4	2	5	2	3
2024/01/31 3:30:46 PM CET	Nurse	Female	Internal medicine	I > 20	manager	56-60	Single	4-5 times per week	3	5 totally	2 seldom	4 often	3	3	4	4	3	2	1 not at all true	1 not at all true	1 not at all true	3	3	3	3	4	4	3	3	4	4	5	5	1	4	1	4	1	5	1	5
2024/01/31 3:34:11 PM CET	Nurse	Female	Surgery-surgery	6-10	Worker	26-30	Married/in a relationship	0-1 times per week	1 not at all	3	1 never	1 never	2	2	3	3	2	2	2	2	2	4	4	3	3	4	3	4	2	3	3	3	5	2	3	3	5	2	4	3	4
2024/01/31 3:37:28 PM CET	Technician	Male	Outpatient	11-15	Worker	35-40	Married/in a relationship	2-3 times per week	3	2	3 sometimes	1 never	5 totally	5 totally	5 totally	4	3	3	3	3	4	2	2	1	2	0	1	1	3	2	4	5	5	3	4	2	4	2	4	3	5
2024/01/31 3:51:26 PM CET	Technician	Male	Tecnical sector	6-10	Tecnico	41-45	Married/in a relationship	2-3 times per week	1 not at all	1 not at all	1 never	1 never	2	4	3	2	2	4	1 not at all true	4	2	3	3	2	1	3	4	3	3	3	2	2	5	1	3	2	2	4	4	3	4
2024/01/31 4:21:12 PM CET	Nurse	Female	emodialisi	I > 20	Worker	46-50	Married/in a relationship	0-1 times per week	3	1 not at all	3 sometimes	1 never	4	4	4	5 totally	3	4	2	2	3	4	4	4	4	4	4	4	3	4	4	3	5	1	5	2	5	4	5	2	4
2024/01/31 4:27:55 PM CET	Administrative sector worker	Female	Administration	0-5	Worker	31-35	Married/in a relationship	0-1 times per week	2	1 not at all	3 sometimes	1 never	4	4	4	3	3	2	2	2	3	4	2	3	3	2	2	3	3	2	2	4	4	3	4	2	2	2	4	2	3
2024/01/31 4:56:23 PM CET	Physician	Female	Internal medicine	11-15	executive	41-45	Single	0-1 times per week	4	5 totally	2 seldom	1 never	5 totally	5 totally	5 totally	4	4	4	4	4	4	4	4	1	4	4	4	3	4	4	3	4	5	4	4	1	5	5	5	4	4
2024/01/31 5:01:29 PM CET	assistente amministrativa	Female	Intensive care medicine	I > 20	Worker	56-60	Single	more than 5 times per week	5 totally	1 not at all	1 never	1 never	4	4	4	4	4	4	4	2	2	4	3	2	3	2	3	3	3	3	3	1	5	1	4	5	1	4	5	3	4
2024/01/31 5:09:38 PM CET	Administrative sector worker	Female	Administration	16-20	Executive	46-50	Married/in a relationship	2-3 times per week	4	1 not at all	3 sometimes	2 seldom	5 totally	5 totally	5 totally	4	3	4	5 totally true	4	4	3	3	3	4	2	3	3	3	3	3	5	5	2	3	2	3	2	4	2	4
2024/01/31 5:14:59 PM CET	Nurse	Female	Outpatient	11-15	Worker	31-35	Married/in a relationship	2-3 times per week	4	1 not at all	1 never	1 never	5 totally	3	4	4	5 totally	4	3	4	4	3	3	4	3	2	3	3	3	2	2	5	4	4	4	3	2	3	4	4	4
2024/01/31 6:02:55 PM CET	Services	Male	Services	16-20	Manager	41-45	Single	more than 5 times per week	4	2	1 never	1 never	4	3	3	4	4	4	2	3	2	4	2	2	3	4	4	4	3	3	2	4	5	1	4	3	4	3	5	3	4
2024/01/31 6:35:08 PM CET	Nurse	Female	Intensive care medicine	16-20	manager	35-40	Married/in a relationship	2-3 times per week	2	1 not at all	1 never	1 never	4	4	3	4	2	2	2	3	3	3	2	1	1	1	1	3	2	2	2	3	4	4	2	3	4	3	4	4	3
2024/01/31 7:55:30 PM CET	Hospitality staff	Female	Surgery e ostetricia	6-10	Worker	41-45	Single	0-1 times per week	1 not at all	1 not at all	2 seldom	1 never	4	4	4	2	4	5 totally true	4	3	4	4	2	3	3	4	4	3	4	4	3	3	5	2	4	1	5	1	5	3	3
2024/01/31 8:01:03 PM CET	Physician	Male	Internal medicine	0-5	Worker	31-35	Married/in a relationship	2-3 times per week	4	1 not at all	1 never	1 never	4	4	4	4	4	4	4	3	3	4	3	4	3	4	4	3	3	3	3	3	4	3	4	2	4	4	4	3	4
2024/01/31 8:10:50 PM CET	Physician	Female	Internal medicine	16-20	manager	41-45	Married/in a relationship	0-1 times per week	3	2	1 never	2 seldom	4	4	4	3	3	2	4	2	2	4	3	2	2	3	2	3	2	3	2	3	5	1	3	2	4	2	5	2	5
2024/01/31 8:17:38 PM CET	Hospitality staff	Female	Hospitality	6-10	Worker	26-30	Single	0-1 times per week	5 totally	4	1 never	1 never	3	4	3	4	5 totally	1 not at all true	1 not at all true	4	1 not at all true	4	4	0	4	0	2	3	4	2	2	3	4	1	3	2	5	1	5	3	3
2024/01/31 8:29:12 PM CET	Nurse	Female	Stroke unit	0-5	Worker	26-30	Married/in a relationship	2-3 times per week	5 totally	1 not at all	1 never	1 never	5 totally	4	4	3	4	2	2	1 not at all true	2	3	3	3	3	4	3	3	2	3	3	3	5	2	3	5	4	4	4	3	2
2024/01/31 8:48:41 PM CET	Physician	Male	Surgery e ostetricia	I > 20	Physician aggiunto	>60	Married/in a relationship	0-1 times per week	3	1 not at all	1 never	1 never	4	4	5 totally	5 totally	5 totally	5 totally true	5 totally true	4	4	4	4	4	3	4	4	4	4	4	4	2	5	1	3	1	3	3	5	1	4
2024/01/31 10:24:20 PM CET	Nurse	Female	Cure palliative	16-20	Worker	35-40	Single	4-5 times per week	3	5 totally	5 very often	1 never	4	4	4	2	4	2	5 totally true	2	2	3	3	3	4	4	4	3	3	4	4	4	5	1	4	4	2	2	1	1	3
2024/01/31 10:29:42 PM CET	Nurse	Male	Surgery	I > 20	As.di cura	>60	Married/in a relationship	0-1 times per week	5 totally	3	1 never	1 never	4	4	4	5 totally	3	3	3	4	3	1	3	3	3	4	1	3	3	3	3	2	5	4	4	3	4	3	4	2	3
2024/01/31 10:47:24 PM CET	Nurse	Female	Intensive care medicine	6-10	manager	31-35	Married/in a relationship	0-1 times per week	1 not at all	1 not at all	1 never	1 never	4	4	4	4	1 not at all	1 not at all true	2	1 not at all true	1 not at all true	4	3	2	3	3	3	4	3	4	3	5	5	3	3	5	4	3	5	2	1
2024/02/01 12:52:24 AM CET	Nurse	Female	maternità	I > 20	Worker	41-45	Single	0-1 times per week	1 not at all	2	1 never	1 never	3	3	4	4	3	1 not at all true	3	2	2	3	3	3	2	2	3	3	4	4	3	2	5	2	3	2	5	2	5	4	4
2024/02/01 1:28:30 AM CET	Nurse	Male	Internal medicine	6-10	manager	31-35	Married/in a relationship	0-1 times per week	4	1 not at all	1 never	1 never	5 totally	4	4	4	3	2	2	3	3	4	3	3	3	2	3	2	3	3	3	4	4	2	3	3	4	2	5	2	3
2024/02/01 7:19:48 AM CET	Hospitality staff	Male	Hospitality	16-20	Manager	51-55	Married/in a relationship	2-3 times per week	3	2	3 sometimes	3 sometimes	3	3	3	2	4	3	2	2	3	3	4	3	3	4	4	4	4	4	3	3	4	1	4	2	4	3	4	3	5
2024/02/01 8:38:44 AM CET	Nurse	Female	Internal medicine	11-15	manager	35-40	Married/in a relationship	2-3 times per week	4	1 not at all	4 often	4 often	4	4	4	4	3	3	3	3	4	4	3	3	4	3	3	3	3	3	3	4	4	2	4	1	4	2	5	3	5
2024/02/01 8:58:12 AM CET	Nurse	Female	emodialisi	I > 20	manager	56-60	Married/in a relationship	0-1 times per week	2	5 totally	1 never	1 never	3	3	3	4	4	4	4	4	4	4	3	3	3	4	3	4	3	3	3	4	4	1	5	1	4	1	4	1	3
2024/02/01 9:21:58 AM CET	Nurse	Female	Outpatient	11-15	Worker	31-35	Married/in a relationship	0-1 times per week	5 totally	1 not at all	1 never	1 never	5 totally	5 totally	5 totally	4	4	1 not at all true	1 not at all true	1 not at all true	1 not at all true	3	3	2	3	2	3	3	2	3	3	5	5	3	4	3	3	1	4	2	3
2024/02/01 9:34:05 AM CET	Administrative sector worker	Female	Administration	I > 20	Worker	56-60	Married/in a relationship	2-3 times per week	3	3	4 often	3 sometimes	4	4	4	4	5 totally	3	2	1 not at all true	2	4	3	3	4	4	4	4	3	4	3	4	5	1	4	1	5	1	5	1	4
2024/02/01 9:34:55 AM CET	Nurse	Male	Administration	6-10	Worker	31-35	Single	4-5 times per week	4	2	1 never	1 never	4	4	4	3	4	2	2	1 not at all true	1 not at all true	4	4	2	4	4	4	4	4	4	4	3	4	2	3	2	4	4	4	5	5
2024/02/01 9:57:26 AM CET	Nurse	Male	Internal medicine	0-5	Worker	31-35	Married/in a relationship	2-3 times per week	3	2	1 never	1 never	5 totally	4	4	4	3	3	2	4	4	3	2	2	3	2	3	3	2	2	2	4	4	2	4	4	3	2	3	1	3
2024/02/01 10:39:56 AM CET	Nurse	Female	Maternità	6-10	Worker	56-60	Married/in a relationship	0-1 times per week	4	3	3 sometimes	3 sometimes	4	5 totally	5 totally	5 totally	5 totally	4	4	5 totally true	4	4	4	4	4	4	4	4	4	4	4	4	5	2	5	1	5	2	5	1	5
2024/02/01 10:40:14 AM CET	Nurse	Female	Penitenziario	6-10	Worker	31-35	Married/in a relationship	0-1 times per week	1 not at all	4	1 never	1 never	5 totally	5 totally	5 totally	5 totally	4	4	4	5 totally true	5 totally true	4	3	4	4	3	4	4	4	3	4	3	5	1	5	3	4	3	5	1	5
2024/02/01 10:46:47 AM CET	Worker	Female	segretariato physician e outpatient	16-20	ASM	41-45	Married/in a relationship	2-3 times per week	4	2	4 often	3 sometimes	5 totally	5 totally	5 totally	5 totally	5 totally	4	4	4	4	4	4	3	3	4	3	4	4	4	4	4	5	3	5	3	5	3	4	2	3
2024/02/01 10:49:33 AM CET	Apprendista worker	Female	Segretariato physician e outpatient	0-5	assistente studi physician	18-25	Single	0-1 times per week	4	3	3 sometimes	2 seldom	4	4	4	4	4	4	4	3	3	3	3	4	4	3	4	3	2	3	4	5	4	2	3	5	3	1	3	2	3
2024/02/01 11:00:38 AM CET	Technician	Male	Tecnical sector	0-5	worker di manutenzione	35-40	Married/in a relationship	0-1 times per week	1 not at all	1 not at all	2 seldom	1 never	4	4	4	2	2	4	4	4	3	3	3	3	2	2	2	2	2	3	3	3	5	2	3	2	4	3	4	3	4
2024/02/01 11:20:19 AM CET	Nurse	Female	Cardiologia	6-10	Worker	35-40	Married/in a relationship	0-1 times per week	3	3	2 seldom	3 sometimes	1 not at all	1 not at all	1 not at all	2	3	1 not at all true	1 not at all true	1 not at all true	1 not at all true	3	3	2	3	3	3	3	2	3	3	4	5	4	4	3	3	3	4	3	2
2024/02/01 11:30:22 AM CET	Worker	Male	Internal medicine	0-5	Worker	18-25	Single	4-5 times per week	4	2	4 often	1 never	4	4	4	4	5 totally	5 totally true	5 totally true	3	4	4	3	4	4	2	4	3	2	3	4	4	4	2	4	3	3	2	4	1	5
2024/02/01 11:32:35 AM CET	Administrative sector worker	Female	Neurosurgery	0-5	Worker	26-30	Married/in a relationship	0-1 times per week	4	3	1 never	1 never	4	4	4	3	4	3	3	2	3	3	3	2	4	2	3	3	3	3	3	4	4	3	4	5	5	2	3	2	3
2024/02/01 11:51:32 AM CET	Administrative sector worker	Female	Internal medicine	0-5	Worker	35-40	Married/in a relationship	0-1 times per week	4	1 not at all	1 never	1 never	3	3	3	3	3	1 not at all true	1 not at all true	1 not at all true	1 not at all true	4	3	2	2	3	2	2	2	2	2	3	4	3	3	2	3	3	3	3	2
2024/02/01 11:52:42 AM CET	Nurse	Male	Intensive care medicine	16-20	manager	51-55	Married/in a relationship	0-1 times per week	3	3	2 seldom	1 never	3	3	3	2	4	3	3	2	2	3	2	1	3	3	3	3	3	3	3	4	5	2	3	3	5	3	4	2	3
2024/02/01 12:40:54 PM CET	Nurse	Female	Surgery	I > 20	vice capo-reparto	51-55	Single	0-1 times per week	4	3	2 seldom	1 never	3	3	3	3	3	3	3	3	4	3	4	4	3	4	3	3	4	4	3	4	5	2	4	3	5	2	5	2	5
2024/02/01 12:49:47 PM CET	Nurse	Female	Outpatient	I > 20	Worker	51-55	Married/in a relationship	0-1 times per week	4	1 not at all	1 never	1 never	5 totally	5 totally	5 totally	4	4	2	2	3	3	4	4	4	4	3	3	4	4	4	4	3	5	1	3	3	5	2	5	1	3
2024/02/01 1:03:37 PM CET	terapista	Female	Internal medicine	16-20	Worker	46-50	Married/in a relationship	0-1 times per week	4	5 totally	1 never	1 never	5 totally	4	5 totally	5 totally	5 totally	4	4	4	4	2	2	2	2	2	3	3	2	4	2	1	5	1	2	1	5	1	5	5	5
2024/02/01 1:11:36 PM CET	Nurse	Female	Internal medicine	0-5	Worker	26-30	Single	0-1 times per week	4	1 not at all	1 never	1 never	5 totally	5 totally	5 totally	4	3	3	3	4	5 totally true	3	3	3	3	3	3	3	2	3	3	2	5	3	3	2	4	2	4	3	3
2024/02/01 2:22:29 PM CET	Nurse	Female	Emergency medicine	I > 20	Worker	51-55	Married/in a relationship	0-1 times per week	5 totally	1 not at all	1 never	1 never	5 totally	3	5 totally	5 totally	4	4	4	2	2	4	4	2	4	3	3	4	3	4	4	3	5	3	5	3	5	1	5	1	3
2024/02/01 2:40:03 PM CET	Nurse	Female	Internal medicine	6-10	nurse	51-55	Single	0-1 times per week	2	2	4 often	4 often	5 totally	5 totally	5 totally	5 totally	4	5 totally true	5 totally true	5 totally true	5 totally true	3	3	3	0	1	3	1	3	4	3	4	5	4	3	3	5	2	4	3	4
2024/02/01 3:52:28 PM CET	Nurse	Female	Intensive care medicine	I > 20	manager	46-50	Married/in a relationship	0-1 times per week	1 not at all	1 not at all	1 never	1 never	3	3	3	4	3	2	2	1 not at all true	1 not at all true	4	4	0	2	2	3	3	3	4	3	1	5	1	2	5	5	4	5	4	5
2024/02/01 4:18:33 PM CET	Technician	Female	Services	11-15	Worker	35-40	Married/in a relationship	0-1 times per week	4	1 not at all	1 never	1 never	3	3	3	5 totally	3	4	2	5 totally true	3	3	2	3	4	3	3	4	2	4	3	5	3	5	4	1	3	1	3	4	2
2024/02/01 5:17:13 PM CET	Physician	Male	Internal medicine	6-10	worker	31-35	Married/in a relationship	2-3 times per week	1 not at all	1 not at all	1 never	1 never	4	4	4	4	1 not at all	3	3	3	3	4	4	4	4	4	4	4	3	3	3	5	4	1	4	4	1	1	4	1	5
2024/02/01 5:34:05 PM CET	Technician	Female	Technical sector	6-10	Executive	31-35	Married/in a relationship	2-3 times per week	4	1 not at all	3 sometimes	2 seldom	3	3	3	2	2	1 not at all true	1 not at all true	1 not at all true	1 not at all true	3	3	2	2	2	2	2	1	3	2	4	5	2	2	5	4	2	4	3	3
2024/02/01 7:53:43 PM CET	Hospitality staff	Female	Hospitality	6-10	Worker	>60	Married/in a relationship	0-1 times per week	5 totally	4	1 never	1 never	4	3	4	4	5 totally	2	2	1 not at all true	2	4	3	4	4	3	3	3	4	4	3	5	5	3	4	4	5	1	3	1	1
2024/02/02 8:46:59 AM CET	Nurse	Male	Emergency medicine	I > 20	manager	51-55	Single	2-3 times per week	5 totally	3	1 never	1 never	4	4	5 totally	5 totally	4	5 totally true	2	2	2	4	3	4	4	4	4	4	4	4	4	5	5	1	5	2	4	1	4	1	4
2024/02/02 9:15:09 AM CET	Nurse	Female	Reparto Acuto di Minor Intensità- postacuto	I > 20	manager	51-55	Single	0-1 times per week	3	4	3 sometimes	2 seldom	4	4	4	2	2	2	2	1 not at all true	1 not at all true	4	3	3	4	3	3	4	4	4	3	4	4	2	3	2	3	2	4	4	5
2024/02/02 10:42:22 AM CET	Lavoratore serviceso informatico	Male	Settore informatico	I > 20	Worker	51-55	Single	0-1 times per week	2	1 not at all	1 never	1 never	5 totally	4	5 totally	5 totally	3	3	3	4	3	4	3	4	4	4	4	2	3	4	3	3	5	5	2	5	5	5	5	5	5
2024/02/02 11:59:52 AM CET	Nurse	Female	Gestione	I > 20	Executive	46-50	Married/in a relationship	0-1 times per week	4	2	3 sometimes	3 sometimes	4	4	4	3	4	3	3	4	5 totally true	4	4	4	4	4	3	4	4	3	4	3	4	1	4	3	4	2	5	3	3
2024/02/02 12:23:40 PM CET	Technician	Male	Services	0-5	Worker	26-30	Single	0-1 times per week	2	1 not at all	2 seldom	1 never	3	3	3	3	2	3	3	3	2	4	3	2	0	3	2	4	4	4	3	4	4	2	5	2	3	1	5	3	3
2024/02/02 12:23:46 PM CET	Technician	Male	Technical sector	6-10	Worker	31-35	Married/in a relationship	0-1 times per week	3	1 not at all	1 never	1 never	5 totally	5 totally	5 totally	4	3	3	3	5 totally true	5 totally true	3	3	3	3	2	3	3	3	3	3	3	4	2	4	3	2	2	4	2	4
2024/02/02 12:33:05 PM CET	levatrice	Female	Surgery e ostetricia	16-20	levatrice	41-45	Married/in a relationship	0-1 times per week	4	2	1 never	1 never	4	3	4	3	3	2	2	3	3	4	4	3	3	3	3	2	3	3	3	2	4	1	3	2	5	2	4	3	3
2024/02/02 2:01:47 PM CET	Nurse	Female	Outpatient	I > 20	Worker	51-55	Single	0-1 times per week	3	2	1 never	1 never	5 totally	5 totally	5 totally	3	4	2	2	3	3	3	3	4	4	2	3	3	3	4	3	3	5	3	3	3	5	1	5	1	5
2024/02/02 2:07:24 PM CET	Nurse	Female	Surgery	6-10	Worker	31-35	Married/in a relationship	0-1 times per week	1 not at all	1 not at all	1 never	1 never	4	4	4	3	1 not at all	3	3	1 not at all true	1 not at all true	4	3	2	2	2	2	2	2	3	3	2	5	1	4	1	5	2	5	3	4
2024/02/02 2:50:06 PM CET	Nurse	Female	Surgery	6-10	Worker	26-30	Single	0-1 times per week	2	1 not at all	3 sometimes	2 seldom	3	3	4	4	3	2	1 not at all true	2	2	4	3	4	4	3	4	2	3	3	3	3	4	2	3	1	3	1	5	2	4
2024/02/02 4:27:59 PM CET	Nurse	Female	Outpatient	I > 20	manager	46-50	Married/in a relationship	2-3 times per week	4	1 not at all	4 often	4 often	5 totally	5 totally	5 totally	5 totally	4	4	4	4	5 totally true	4	4	3	4	3	3	4	4	4	4	5	5	1	4	3	5	1	5	1	4
2024/02/02 10:04:52 PM CET	Nurse	Female	Odg	16-20	Worker	35-40	Single	0-1 times per week	1 not at all	1 not at all	1 never	1 never	4	4	4	3	3	3	3	3	3	3	3	3	3	3	3	3	3	3	3	3	4	3	4	3	4	3	4	3	3
2024/02/02 10:08:23 PM CET	Nurse	Female	Intensive care medicine	16-20	manager	35-40	Married/in a relationship	0-1 times per week	1 not at all	1 not at all	1 never	1 never	3	3	3	4	2	4	3	1 not at all true	1 not at all true	4	4	2	4	3	3	3	2	4	4	3	5	3	3	4	3	3	4	4	5
2024/02/02 11:24:17 PM CET	Nurse	Female	Surgery e ostetricia	16-20	levatrice	41-45	Married/in a relationship	0-1 times per week	1 not at all	1 not at all	1 never	1 never	4	4	4	4	5 totally	4	4	4	1 not at all true	4	4	4	4	4	4	4	4	4	3	4	5	2	4	3	4	2	5	2	2
2024/02/03 4:17:46 AM CET	Nurse	Female	Intensive care medicine	6-10	manager	26-30	Married/in a relationship	4-5 times per week	2	1 not at all	3 sometimes	1 never	3	3	3	3	2	3	1 not at all true	2	2	3	2	2	4	2	3	4	4	4	3	3	5	1	3	1	5	1	3	2	4
2024/02/03 9:05:14 AM CET	Nurse	Female	Internal medicine	I > 20	Worker	51-55	Married/in a relationship	0-1 times per week	4	1 not at all	1 never	1 never	4	4	4	4	4	1 not at all true	1 not at all true	1 not at all true	1 not at all true	4	4	4	4	3	3	4	3	3	3	1	5	3	4	3	5	2	5	3	5
2024/02/03 11:24:03 AM CET	Nurse	Female	Internal medicine	I > 20	Worker	>60	Single	4-5 times per week	3	1 not at all	1 never	1 never	4	4	4	4	4	3	3	3	3	4	4	3	4	4	4	4	3	4	4	3	5	1	5	3	4	2	5	1	4
2024/02/03 12:37:04 PM CET	OSS	Male	RAMI	0-5	Worker	31-35	Married/in a relationship	4-5 times per week	1 not at all	1 not at all	1 never	1 never	4	4	5 totally	2	2	3	3	3	2	3	3	1	4	4	3	2	4	4	1	4	3	2	5	4	3	1	3	3	3
2024/02/03 5:32:35 PM CET	Nurse	Female	Internal medicine	I > 20	Worker	56-60	Married/in a relationship	0-1 times per week	1 not at all	1 not at all	1 never	1 never	4	4	4	3	4	3	3	4	3	3	3	3	3	3	3	3	3	3	4	2	5	2	3	2	5	1	5	2	5
2024/02/03 9:42:54 PM CET	Nurse	Female	Surgery	11-15	adc	41-45	Married/in a relationship	0-1 times per week	4	4	1 never	2 seldom	5 totally	4	5 totally	4	4	3	2	1 not at all true	1 not at all true	4	4	4	3	2	3	3	4	4	3	5	5	1	4	1	5	1	5	1	3
2024/02/03 9:55:59 PM CET	Nurse	Female	RAMI	0-5	Worker	18-25	Single	2-3 times per week	2	3	1 never	1 never	5 totally	4	4	3	2	3	4	4	4	4	2	3	4	4	3	3	3	4	2	3	4	2	4	3	5	1	4	1	4
2024/02/03 10:36:25 PM CET	Nurse	Female	Surgery	16-20	Worker	41-45	Married/in a relationship	0-1 times per week	3	2	1 never	4 often	4	3	4	4	3	2	3	2	2	3	3	3	3	2	3	2	3	3	3	4	4	3	3	4	3	1	5	3	4
2024/02/03 11:30:24 PM CET	Technician	Female	services	16-20	Worker	41-45	Married/in a relationship	2-3 times per week	2	1 not at all	2 seldom	1 never	3	2	5 totally	2	3	1 not at all true	1 not at all true	3	4	4	4	2	3	3	4	4	3	4	0	3	5	1	4	1	3	3	4	4	3
2024/02/04 4:42:52 AM CET	Nurse	Female	Internal medicine	I > 20	Worker	51-55	Married/in a relationship	4-5 times per week	4	4	2 seldom	1 never	3	4	3	3	5 totally	3	2	4	4	3	3	3	3	2	3	3	3	4	3	2	5	2	5	1	5	2	5	1	2
2024/02/04 11:02:01 AM CET	Nurse	Male	Direzione infermieristica	0-5	manager	41-45	Married/in a relationship	2-3 times per week	3	3	3 sometimes	2 seldom	5 totally	5 totally	5 totally	5 totally	5 totally	5 totally true	5 totally true	5 totally true	5 totally true	4	3	4	4	4	4	3	4	4	4	5	5	1	5	1	5	2	5	1	3
2024/02/04 11:08:54 AM CET	Nurse	Male	Internal medicine	16-20	Nurse	46-50	Single	0-1 times per week	2	1 not at all	2 seldom	1 never	2	3	3	2	2	3	2	3	4	2	2	2	1	3	3	2	2	3	3	3	3	1	3	1	4	2	3	4	5
2024/02/04 5:04:11 PM CET	Nurse	Female	Surgery	I > 20	Nurse	51-55	Married/in a relationship	2-3 times per week	4	2	1 never	1 never	4	4	3	3	4	3	4	4	4	4	3	3	3	3	3	3	3	4	3	2	4	1	3	2	4	2	4	2	2
2024/02/04 9:49:52 PM CET	Nurse	Female	Internal medicine	I > 20	Worker	56-60	Married/in a relationship	0-1 times per week	1 not at all	3	2 seldom	1 never	4	4	4	3	1 not at all	4	4	4	4	4	4	3	4	3	4	2	3	4	4	5	5	1	3	1	4	1	5	4	4
2024/02/04 10:38:29 PM CET	Nurse	Female	Internal medicine	0-5	Worker	26-30	Single	2-3 times per week	2	1 not at all	2 seldom	1 never	4	4	4	4	3	2	3	4	4	3	3	3	3	3	4	3	3	4	3	5	5	3	4	2	3	3	4	2	4
2024/02/05 4:34:34 AM CET	Nurse	Female	Intensive care medicine	11-15	Tutor	35-40	Single	0-1 times per week	3	2	4 often	4 often	4	4	4	4	3	3	3	4	4	3	3	3	4	3	4	3	2	4	4	3	5	2	3	1	5	2	5	1	5
2024/02/05 8:45:39 AM CET	Technician	Female	Cure palliative	I > 20	Worker	41-45	Married/in a relationship	2-3 times per week	2	2	3 sometimes	3 sometimes	4	3	3	3	3	4	4	4	3	4	3	3	3	3	3	2	3	3	2	3	5	1	3	3	3	2	4	3	3
2024/02/05 9:34:53 AM CET	Administrative sector worker	Female	Outpatient	I > 20	Worker	56-60	Single	0-1 times per week	3	3	2 seldom	3 sometimes	4	3	4	4	4	4	4	3	2	3	3	3	3	3	3	3	3	3	3	4	5	1	4	2	4	2	5	2	4
2024/02/05 10:10:17 AM CET	Technician	Male	Tecnical sector	I > 20	Worker	56-60	Married/in a relationship	0-1 times per week	2	1 not at all	1 never	1 never	4	4	4	3	3	2	2	3	1 not at all true	1	3	4	3	3	4	3	3	3	3	4	5	1	4	4	4	1	5	2	3
2024/02/05 10:14:47 AM CET	Physician	Male	Otorinolaringoiatria	I > 20	Executive	>60	Married/in a relationship	2-3 times per week	5 totally	3	2 seldom	1 never	4	4	4	4	3	3	3	1 not at all true	1 not at all true	4	3	2	3	3	3	3	3	3	3	2	4	2	4	1	4	3	4	4	3
2024/02/05 10:21:24 AM CET	Technician	Male	Tecnical sector	I > 20	Worker	56-60	Married/in a relationship	2-3 times per week	4	2	1 never	2 seldom	3	3	3	4	3	4	4	2	2	2	3	3	3	3	3	3	2	2	3	4	4	3	4	3	2	2	3	3	2
2024/02/05 10:29:13 AM CET	Administrative sector worker	Female	Administration	0-5	Worker	31-35	Married/in a relationship	0-1 times per week	3	3	2 seldom	1 never	3	3	3	3	3	3	3	3	2	3	3	3	2	2	3	4	3	3	3	5	5	4	4	2	3	3	4	2	4
2024/02/05 11:53:50 AM CET	Nurse	Female	Outpatient	I > 20	Worker	46-50	Married/in a relationship	0-1 times per week	3	2	2 seldom	2 seldom	4	4	4	3	3	3	2	3	3	3	3	2	2	3	3	3	3	3	3	4	5	2	4	2	4	1	4	1	1
2024/02/05 12:07:24 PM CET	Nurse	Female	Team fix	11-15	Worker	31-35	Married/in a relationship	0-1 times per week	1 not at all	1 not at all	1 never	1 never	3	2	2	3	4	2	1 not at all true	3	3	4	2	4	1	2	2	1	2	4	4	5	4	5	3	2	1	1	4	1	5
2024/02/05 12:13:11 PM CET	Nurse	Female	Outpatient	I > 20	Worker	56-60	Married/in a relationship	0-1 times per week	4	2	2 seldom	1 never	5 totally	4	4	3	4	3	3	3	3	3	2	1	2	1	3	3	1	2	2	4	5	1	4	3	3	3	4	2	3
2024/02/05 1:59:15 PM CET	ASM	Female	Outpatient	I > 20	Worker	56-60	Married/in a relationship	0-1 times per week	4	1 not at all	3 sometimes	1 never	4	4	3	3	3	2	2	3	2	2	2	2	2	2	3	3	2	3	2	3	5	1	3	2	2	3	3	4	5
2024/02/05 2:11:42 PM CET	Nurse	Female	Anaesthesia	I > 20	manager	51-55	Single	2-3 times per week	1 not at all	2	1 never	1 never	4	4	3	3	2	1 not at all true	1 not at all true	3	3	2	3	1	3	4	2	3	2	3	3	4	4	5	2	1	5	4	4	3	5
2024/02/05 3:29:09 PM CET	Administrative sector worker	Female	Administration	0-5	Worker	46-50	Married/in a relationship	4-5 times per week	4	3	4 often	1 never	4	3	4	4	4	3	3	4	3	2	4	4	4	2	3	3	3	3	4	3	5	2	4	2	5	1	5	1	4
2024/02/05 3:37:28 PM CET	Technician	Female	Internal medicine	0-5	parte di un team	26-30	Single	2-3 times per week	3	2	1 never	2 seldom	3	2	2	3	2	1 not at all true	1 not at all true	4	4	4	3	3	4	4	4	3	4	4	3	4	5	1	2	2	5	1	4	3	3
2024/02/05 4:16:26 PM CET	Nurse	Male	Anaesthesia	11-15	manager	35-40	Married/in a relationship	0-1 times per week	1 not at all	2	1 never	1 never	3	3	3	2	3	1 not at all true	1 not at all true	2	2	3	3	1	3	2	2	4	2	4	3	3	4	1	3	2	5	5	5	3	5
2024/02/05 4:46:02 PM CET	Technician	Male	Services	16-20	TRM	41-45	Married/in a relationship	0-1 times per week	1 not at all	3	1 never	1 never	3	3	3	2	3	2	2	1 not at all true	1 not at all true	4	3	4	2	4	4	4	4	4	4	5	5	1	5	1	3	1	5	1	5
2024/02/05 9:37:58 PM CET	Nurse	Male	Internal medicine	16-20	Worker	46-50	Married/in a relationship	0-1 times per week	3	1 not at all	1 never	1 never	2	3	4	2	3	4	2	5 totally true	5 totally true	1	3	3	3	1	2	3	2	2	3	4	4	3	5	3	1	4	3	1	3
2024/02/06 12:18:30 AM CET	Technician	Female	Services	I > 20	Executive	46-50	Single	0-1 times per week	3	3	3 sometimes	1 never	4	4	4	4	3	2	2	2	1 not at all true	4	4	2	2	2	2	3	4	3	3	3	5	3	3	1	5	2	4	3	5
2024/02/06 2:34:26 AM CET	Nurse	Female	Surgery e ostetricia	16-20	manager	41-45	Married/in a relationship	2-3 times per week	3	3	1 never	1 never	4	3	3	3	2	3	1 not at all true	2	1 not at all true	2	1	2	2	1	2	3	1	1	1	3	4	3	2	4	4	2	4	3	5
2024/02/06 11:57:42 AM CET	Administrative sector worker	Female	Administration	16-20	Worker	41-45	Married/in a relationship	2-3 times per week	4	1 not at all	3 sometimes	3 sometimes	4	4	5 totally	5 totally	5 totally	2	2	3	3	2	2	2	4	1	4	4	4	4	0	5	5	1	3	3	2	4	4	3	5
2024/02/06 12:56:17 PM CET	worker	Male	Internal medicine	11-15	worker	35-40	Married/in a relationship	2-3 times per week	4	1 not at all	2 seldom	1 never	2	3	3	3	4	2	2	2	2	4	3	3	3	3	3	2	3	4	3	3	4	1	3	1	5	3	3	2	5
